# Supplementary material for: Cry1Ac toxin binding in the velvetbean caterpillar Anticarsia gemmatalis: study of midgut aminopeptidases N
Source: Front Physiol. 2024 Oct 29;15:1484489. doi: 10.3389/fphys.2024.1484489 (PMC11554492; doi:10.3389/fphys.2024.1484489)
Supplement: Supplementary file 1 [file Table2.XLSX]

## Sheet: Plan1
Checked	Protein FDR Confidence	Master	Accession	Description	Contaminant	Exp. q-value	Sum PEP Score	Coverage	# Peptides	# PSMs	# Unique Peptides	# Protein Groups	# AAs	MW [kDa]	calc. pI	Found in Sample: [S1] F1: Sample	Found in Sample: [S2] F2: Sample	Found in Sample: [S3] F3: Sample	Found in Sample: [S4] F4: Sample	Found in Sample: [S5] F5: Sample	Found in Sample: [S6] F6: Sample	Found in Sample: [S7] F7: Sample	Found in Sample: [S8] F8: Sample	Found in Sample: [S9] F9: Sample	Found in Sample: [S10] F10: Sample	Found in Sample: [S11] F11: Sample	Found in Sample: [S12] F12: Sample	Found in Sample: [S13] F13: Sample	Found in Sample: [S14] F14: Sample	Modifications	Score Sequest HT	# Peptides Sequest HT
False	High	IsMasterProtein	TRINITY_DN2144_c0_g1_i2.p1	type:5prime_partial gc:universal TRINITY_DN2144_c0_g1_i2:10509-520(-)	False	0	532.09	37.3986	116	912	116	1	3329	368.15	8.15	High	High	High	High	High	High	High	High	High	High	High	High	High	High		1576.23	116
False	High	IsMasterProtein	TRINITY_DN216_c0_g1_i11.p2	type:complete gc:universal TRINITY_DN216_c0_g1_i11:6783-11099(+)	False	0	390.913	42.9764	63	688	61	1	1438	164.301	5.8	High	High	High	High	High	High	High	High	High	High	High	High	High	High		1114.03	63
False	High	IsMasterProtein	Cont_P35527	Keratin, type I cytoskeletal 9 OS=Homo sapiens OX=9606 GN=KRT9 PE=1 SV=3	True	0	295.64	58.748	31	643	30	1	623	62.027	5.24	High	High	High	High	High	High	High	High	High	High	High	High	High	High		1553.77	31
False	High	IsMasterProtein	TRINITY_DN139_c0_g1_i2.p1	type:complete gc:universal TRINITY_DN139_c0_g1_i2:8823-118(-)	False	0	276.797	22.0269	42	515	42	1	2901	321.228	4.78	High	High	High	High	High	High	High	High	High	High	High	High	High	High		715.777	42
False	High	IsMasterProtein	Cont_P04264	Keratin, type II cytoskeletal 1 OS=Homo sapiens OX=9606 GN=KRT1 PE=1 SV=6	True	0	273.316	61.3354	43	512	33	1	644	65.999	8.12	High	High	High	High	High	High	High	High	High	High	High	High	High	High		2328.09	43
False	High	IsMasterProtein	TRINITY_DN1949_c0_g1_i1.p1	type:3prime_partial gc:universal TRINITY_DN1949_c0_g1_i1:5013-1(-)	False	0	273.3	26.6308	41	445	41	1	1671	191.33	5.62	High	High	High	High	High	High	High	High	High	High	High	High	High	High		656.594	41
False	High	IsMasterProtein	Cont_P13645	Keratin, type I cytoskeletal 10 OS=Homo sapiens OX=9606 GN=KRT10 PE=1 SV=6	True	0	271.279	58.9041	36	386	21	1	584	58.792	5.21	High	High	High	High	High	High	High	High	High	High	High	High	High	High		1938.47	36
False	High	IsMasterProtein	Cont_P35908	Keratin, type II cytoskeletal 2 epidermal OS=Homo sapiens OX=9606 GN=KRT2 PE=1 SV=2	True	0	270.745	64.4757	40	385	29	1	639	65.393	8	High	High	High	High	High	High	High	High	High	High	High	High	High	High		1421.91	40
False	High	IsMasterProtein	TRINITY_DN2298_c0_g1_i10.p1	type:complete gc:universal TRINITY_DN2298_c0_g1_i10:2565-712(-)	False	0	228.778	58.9951	30	380	30	1	617	68.122	5.29	High	High	High	High	High	High	High	High	High	High	High	High	High	High		1089.24	30
False	High	IsMasterProtein	TRINITY_DN842_c0_g1_i5.p1	type:5prime_partial gc:universal TRINITY_DN842_c0_g1_i5:3-3038(+)	False	0	228.511	34.5203	27	371	27	1	1011	112.491	5.45	High	High	High	High	High	High	High	High	High	High	High	High	High	High		952.191	27
False	High	IsMasterProtein	TRINITY_DN39_c0_g1_i10.p1	type:complete gc:universal TRINITY_DN39_c0_g1_i10:4237-1475(-)	False	0	223.079	50	42	363	42	1	920	102.839	5.25	High	High	High	High	High	High	High	High	High	High	High	High	High	High		822.657	42
False	High	IsMasterProtein	TRINITY_DN1045_c0_g1_i3.p1	type:complete gc:universal TRINITY_DN1045_c0_g1_i3:93-3155(+)	False	0	216.002	30.1961	24	336	24	1	1020	114.515	5.87	High	High	High	High	High	High	High	High	High	High	High	High	High	High		1039.85	24
False	High	IsMasterProtein	TRINITY_DN2409_c0_g1_i6.p1	type:complete gc:universal TRINITY_DN2409_c0_g1_i6:1689-142(-)	False	0	215.488	63.6893	21	323	21	1	515	54.859	5.41	High	High	High	High	High	High	High	High	Not Found	High	High	High	Not Found	Not Found		504.179	21
False	High	IsMasterProtein	TRINITY_DN2576_c0_g1_i2.p1	type:complete gc:universal TRINITY_DN2576_c0_g1_i2:2533-365(-)	False	0	215.279	44.8753	26	320	26	1	722	77.646	7.46	Not Found	Not Found	High	High	High	High	High	High	High	High	High	High	Not Found	Not Found		689.13	26
False	High	IsMasterProtein	TRINITY_DN5097_c0_g1_i10.p1	type:complete gc:universal TRINITY_DN5097_c0_g1_i10:2285-801(-)	False	0	214.332	57.4899	24	311	24	1	494	55.265	4.68	High	High	High	High	High	High	High	High	High	High	High	High	High	High		764.943	24
False	High	IsMasterProtein	TRINITY_DN5616_c0_g1_i1.p1	type:complete gc:universal TRINITY_DN5616_c0_g1_i1:2212-734(-)	False	0	211.24	56.7073	22	287	22	1	492	54.76	5.34	High	High	High	High	High	High	High	High	High	High	High	High	High	High		794.948	22
False	High	IsMasterProtein	TRINITY_DN1001_c0_g1_i16.p1	type:complete gc:universal TRINITY_DN1001_c0_g1_i16:6408-1936(-)	False	0	209.381	26.7114	39	286	39	1	1490	169.859	5.6	High	High	High	High	High	High	High	High	High	High	High	High	High	High		851.918	39
False	High	IsMasterProtein	TRINITY_DN996_c0_g1_i13.p1	type:complete gc:universal TRINITY_DN996_c0_g1_i13:1614-49(-)	False	0	197.572	44.5298	20	285	18	1	521	58.508	8.6	High	High	High	High	High	High	High	High	High	High	High	High	High	High		1003.38	20
False	High	IsMasterProtein	TRINITY_DN2247_c0_g1_i14.p1	type:complete gc:universal TRINITY_DN2247_c0_g1_i14:111-1577(+)	False	0	181.444	71.7213	25	284	14	1	488	52.374	5.86	Not Found	Not Found	High	High	High	High	High	High	Not Found	Not Found	High	High	Not Found	High		431.26	25
False	High	IsMasterProtein	TRINITY_DN2592_c0_g1_i10.p1	type:complete gc:universal TRINITY_DN2592_c0_g1_i10:3613-797(-)	False	0	180.98	27.6119	20	284	20	1	938	105.34	5.15	High	High	High	High	High	High	High	High	High	High	High	High	High	High		516.068	20
False	High	IsMasterProtein	TRINITY_DN1048_c0_g1_i1.p1	type:complete gc:universal TRINITY_DN1048_c0_g1_i1:101-1510(+)	False	0	178.25	59.2751	24	282	24	1	469	53.548	8.56	High	High	High	High	High	High	High	High	High	High	High	High	High	High		499.347	24
False	High	IsMasterProtein	TRINITY_DN3695_c0_g1_i1.p1	type:complete gc:universal TRINITY_DN3695_c0_g1_i1:1988-261(-)	False	0	177.353	57.5652	28	269	28	1	575	64.724	9.2	High	High	High	High	High	High	High	High	High	High	High	High	High	High		436.271	28
False	High	IsMasterProtein	TRINITY_DN1401_c10_g1_i1.p1	type:complete gc:universal TRINITY_DN1401_c10_g1_i1:6488-1788(-)	False	0	168.104	31.6731	41	241	41	1	1566	176.808	5.57	High	High	High	High	High	High	High	High	High	High	High	High	High	High		457.455	41
False	High	IsMasterProtein	Cont_Q2HJ86	Tubulin alpha-1D chain OS=Bos taurus OX=9913 GN=TUBA1D PE=1 SV=1	True	0	167.903	52.8761	18	232	2	1	452	50.251	5.03	High	High	High	Not Found	High	High	High	High	High	High	High	High	High	High		525.079	18
False	High	IsMasterProtein	TRINITY_DN841_c1_g1_i12.p1	type:5prime_partial gc:universal TRINITY_DN841_c1_g1_i12:2-1432(+)	False	0	167.088	59.8739	18	217	4	1	476	52.934	5.6	High	High	High	High	High	High	High	High	High	Not Found	High	High	Not Found	Not Found		516.382	18
False	High	IsMasterProtein	TRINITY_DN5597_c0_g1_i10.p1	type:complete gc:universal TRINITY_DN5597_c0_g1_i10:136-3636(+)	False	0	165.093	41.5952	37	217	37	1	1166	133.636	7.24	High	High	High	High	High	High	High	High	High	High	High	High	High	High		374.836	37
False	High	IsMasterProtein	TRINITY_DN3637_c0_g1_i3.p1	type:complete gc:universal TRINITY_DN3637_c0_g1_i3:204-2183(+)	False	0	162.264	41.4264	26	211	21	1	659	73.011	5.34	Not Found	Not Found	High	High	High	High	High	High	High	High	High	High	Not Found	Not Found		408.719	26
False	High	IsMasterProtein	TRINITY_DN1995_c0_g1_i1.p1	type:complete gc:universal TRINITY_DN1995_c0_g1_i1:1620-58(-)	False	0	161.917	39.2308	20	202	20	1	520	58.365	8.02	Not Found	Not Found	High	High	High	High	High	High	Not Found	Not Found	High	High	High	Not Found		428.881	20
False	High	IsMasterProtein	TRINITY_DN272_c0_g2_i4.p1	type:complete gc:universal TRINITY_DN272_c0_g2_i4:4795-173(-)	False	0	155.91	27.9221	40	201	38	1	1540	173.66	5.64	High	High	High	High	High	High	High	High	High	High	High	High	High	High		416.24	40
False	High	IsMasterProtein	Cont_P02533	Keratin, type I cytoskeletal 14 OS=Homo sapiens OX=9606 GN=KRT14 PE=1 SV=4	True	0	153.377	59.322	30	200	8	1	472	51.529	5.16	High	High	High	High	High	High	High	High	High	High	High	High	High	High		950.723	30
False	High	IsMasterProtein	TRINITY_DN8058_c0_g1_i1.p1	type:5prime_partial gc:universal TRINITY_DN8058_c0_g1_i1:3147-1261(-)	False	0	150.811	38.6943	19	197	19	1	628	68.504	7.96	Not Found	Not Found	High	High	High	High	High	High	High	High	High	High	High	High		393.755	19
False	High	IsMasterProtein	TRINITY_DN2052_c0_g1_i10.p1	type:5prime_partial gc:universal TRINITY_DN2052_c0_g1_i10:3-3572(+)	False	0	147.906	29.2683	25	197	25	1	1189	127.154	7.2	High	High	High	High	High	High	High	High	High	High	High	High	High	High		592.066	25
False	High	IsMasterProtein	TRINITY_DN945_c0_g1_i13.p1	type:complete gc:universal TRINITY_DN945_c0_g1_i13:143-7492(+)	False	0	146.733	18.6198	40	195	40	1	2449	279.776	5.31	High	High	High	High	High	High	High	High	High	High	High	High	High	High		324.187	40
False	High	IsMasterProtein	TRINITY_DN891_c1_g1_i2.p1	type:complete gc:universal TRINITY_DN891_c1_g1_i2:2291-174(-)	False	0	145.997	33.9007	22	194	22	1	705	77.243	6.99	High	High	High	High	High	High	High	High	High	High	High	High	High	High		516.33	22
False	High	IsMasterProtein	Cont_P81948	Tubulin alpha-4A chain OS=Bos taurus OX=9913 GN=TUBA4A PE=1 SV=2	True	0	145.53	40.625	14	194	2	1	448	49.892	5.06	Not Found	Not Found	Not Found	Not Found	Not Found	Not Found	Not Found	Not Found	High	Not Found	Not Found	Not Found	Not Found	Not Found		440.522	14
False	High	IsMasterProtein	Cont_P08779	Keratin, type I cytoskeletal 16 OS=Homo sapiens OX=9606 GN=KRT16 PE=1 SV=4	True	0	144.24	54.7569	27	191	9	1	473	51.236	5.05	High	High	High	High	High	High	High	High	High	High	High	High	High	High		803.251	27
False	High	IsMasterProtein	Cont_Q2KJD0	Tubulin beta-5 chain OS=Bos taurus OX=9913 GN=TUBB5 PE=2 SV=1	True	0	142.522	59.009	19	189	12	1	444	49.639	4.89	High	High	High	High	High	High	High	High	High	High	High	High	High	High		280.185	19
False	High	IsMasterProtein	Cont_P13647	Keratin, type II cytoskeletal 5 OS=Homo sapiens OX=9606 GN=KRT5 PE=1 SV=3	True	0	141.621	42.0339	30	187	9	1	590	62.34	7.74	High	High	High	High	High	High	High	High	High	High	High	High	High	High		774.676	30
False	High	IsMasterProtein	TRINITY_DN20384_c0_g1_i1.p1	type:complete gc:universal TRINITY_DN20384_c0_g1_i1:2342-681(-)	False	0	139.956	42.4955	22	187	22	1	553	61.118	8.02	Not Found	Not Found	High	High	High	High	High	High	Not Found	Not Found	High	High	Not Found	Not Found		358.652	22
False	High	IsMasterProtein	Cont_P60712	Actin, cytoplasmic 1 OS=Bos taurus OX=9913 GN=ACTB PE=1 SV=1	True	0	137.655	59.7333	16	181	10	1	375	41.71	5.48	High	High	High	High	High	High	High	High	High	High	High	High	High	High		775.709	16
False	High	IsMasterProtein	TRINITY_DN2058_c0_g1_i6.p1	type:5prime_partial gc:universal TRINITY_DN2058_c0_g1_i6:3419-885(-)	False	0	135.169	37.3223	21	179	21	1	844	93.7	5.11	High	High	High	High	Not Found	High	High	High	High	High	High	High	High	High		340.579	21
False	High	IsMasterProtein	TRINITY_DN3093_c0_g1_i2.p1	type:complete gc:universal TRINITY_DN3093_c0_g1_i2:204-2513(+)	False	0	133.371	35.3706	21	178	20	1	769	83.534	5.77	High	High	High	High	High	High	High	High	High	High	High	High	High	High		618.884	21
False	High	IsMasterProtein	TRINITY_DN4747_c0_g2_i1.p1	type:complete gc:universal TRINITY_DN4747_c0_g2_i1:4922-1164(-)	False	0	132.67	14.4569	16	178	16	1	1252	138.786	4.56	Not Found	Not Found	High	Not Found	High	High	Not Found	High	Not Found	Not Found	High	High	Not Found	Not Found		236.683	16
False	High	IsMasterProtein	TRINITY_DN5122_c0_g1_i1.p2	type:complete gc:universal TRINITY_DN5122_c0_g1_i1:101-1501(+)	False	0	130.983	40.7725	18	178	18	1	466	51.282	6.47	High	High	High	High	High	High	High	High	High	High	High	High	High	Not Found		484.83	18
False	High	IsMasterProtein	Cont_P02538	Keratin, type II cytoskeletal 6A OS=Homo sapiens OX=9606 GN=KRT6A PE=1 SV=3	True	0	130.943	42.3759	30	176	3	1	564	60.008	8	High	High	High	High	High	High	High	High	High	High	High	High	High	High		695.783	30
False	High	IsMasterProtein	TRINITY_DN2573_c0_g1_i12.p1	type:3prime_partial gc:universal TRINITY_DN2573_c0_g1_i12:363-1541(+)	False	0	128.811	43.5115	15	176	5	1	393	45.458	6.32	High	High	High	High	High	High	High	High	High	High	High	High	High	High		447.337	15
False	High	IsMasterProtein	TRINITY_DN14322_c1_g1_i3.p1	type:complete gc:universal TRINITY_DN14322_c1_g1_i3:260-2773(+)	False	0	127.442	30.1075	20	176	19	1	837	95.733	6.11	High	High	High	High	High	High	High	High	High	High	High	High	High	High		446.96	20
False	High	IsMasterProtein	TRINITY_DN5872_c0_g1_i11.p1	type:complete gc:universal TRINITY_DN5872_c0_g1_i11:113-1573(+)	False	0	124.953	47.5309	18	175	9	1	486	52.442	6.61	Not Found	Not Found	High	High	Not Found	Not Found	High	High	Not Found	Not Found	High	Not Found	Not Found	Not Found		280.856	18
False	High	IsMasterProtein	TRINITY_DN2251_c0_g2_i1.p1	type:5prime_partial gc:universal TRINITY_DN2251_c0_g2_i1:3704-1482(-)	False	0	124.219	34.3243	21	169	21	1	740	82.104	8.38	High	High	High	High	High	High	High	High	High	High	High	High	High	High		384.42	21
False	High	IsMasterProtein	Cont_P04259	Keratin, type II cytoskeletal 6B OS=Homo sapiens OX=9606 GN=KRT6B PE=1 SV=5	True	0	123.585	42.1986	29	163	4	1	564	60.03	8	High	High	High	Not Found	High	High	High	High	High	High	High	High	High	High		701.381	29
False	High	IsMasterProtein	TRINITY_DN4533_c0_g1_i1.p1	type:complete gc:universal TRINITY_DN4533_c0_g1_i1:1617-316(-)	False	0	123.478	50.5774	15	158	15	1	433	46.554	6.21	Not Found	Not Found	Not Found	Not Found	High	High	Not Found	Not Found	High	Not Found	High	High	High	Not Found		253.162	15
False	High	IsMasterProtein	TRINITY_DN940_c1_g1_i3.p1	type:complete gc:universal TRINITY_DN940_c1_g1_i3:80-1372(+)	False	0	122.545	36.5116	15	158	15	1	430	49.441	4.7	Not Found	Not Found	High	High	High	High	High	High	High	High	High	High	Not Found	High		407.722	15
False	High	IsMasterProtein	TRINITY_DN2573_c0_g1_i13.p1	type:5prime_partial gc:universal TRINITY_DN2573_c0_g1_i13:1-888(+)	False	0	122.318	50.1695	14	155	4	1	295	34.046	7.14	High	High	High	High	High	High	High	High	High	High	High	High	High	High		441.417	14
False	High	IsMasterProtein	TRINITY_DN646_c0_g1_i1.p1	type:complete gc:universal TRINITY_DN646_c0_g1_i1:286-1821(+)	False	0	121.11	41.0959	19	155	19	1	511	57.038	7.08	High	High	High	High	High	High	High	High	High	High	High	High	High	High		503.85	19
False	High	IsMasterProtein	TRINITY_DN1607_c0_g1_i2.p1	type:complete gc:universal TRINITY_DN1607_c0_g1_i2:3141-265(-)	False	0	120.142	27.453	21	153	21	1	958	109.464	5.36	High	High	High	High	High	High	High	High	High	High	High	High	High	Not Found		231.175	21
False	High	IsMasterProtein	TRINITY_DN1226_c0_g1_i2.p1	type:complete gc:universal TRINITY_DN1226_c0_g1_i2:206-1774(+)	False	0	119.321	35.8238	15	152	15	1	522	55.895	7.53	Not Found	Not Found	High	High	High	High	High	High	Not Found	Not Found	High	High	Not Found	Not Found		356.907	15
False	High	IsMasterProtein	TRINITY_DN996_c0_g2_i1.p1	type:3prime_partial gc:universal TRINITY_DN996_c0_g2_i1:1079-3(-)	False	0	118.804	36.4903	10	151	8	1	359	41.044	6.76	Not Found	Not Found	High	High	High	High	High	High	High	High	High	High	Not Found	Not Found		426.804	10
False	High	IsMasterProtein	TRINITY_DN907_c0_g1_i2.p1	type:complete gc:universal TRINITY_DN907_c0_g1_i2:13002-499(-)	False	0	118.291	9.9832	42	149	42	1	4167	476.474	6.52	High	High	High	High	High	High	High	Not Found	High	High	High	High	High	High		210.955	42
False	High	IsMasterProtein	TRINITY_DN6636_c0_g1_i1.p1	type:complete gc:universal TRINITY_DN6636_c0_g1_i1:1995-277(-)	False	0	118.067	44.5804	18	149	18	1	572	60.969	5.86	Not Found	Not Found	High	High	High	High	High	High	Not Found	Not Found	High	High	Not Found	Not Found		281.106	18
False	High	IsMasterProtein	TRINITY_DN2000_c0_g1_i1.p1	type:complete gc:universal TRINITY_DN2000_c0_g1_i1:4837-1532(-)	False	0	117.819	26.2489	29	149	29	1	1101	126.436	9.04	High	High	High	High	High	High	High	High	High	High	High	High	High	High		421.78	29
False	High	IsMasterProtein	TRINITY_DN1746_c0_g1_i7.p1	type:5prime_partial gc:universal TRINITY_DN1746_c0_g1_i7:1412-177(-)	False	0	117.647	49.635	16	148	16	1	411	42.672	7.2	Not Found	Not Found	High	High	Not Found	High	High	High	Not Found	Not Found	Not Found	Not Found	Not Found	Not Found		236.469	16
False	High	IsMasterProtein	TRINITY_DN2151_c0_g1_i3.p1	type:complete gc:universal TRINITY_DN2151_c0_g1_i3:2187-913(-)	False	0	116.534	43.8679	17	146	17	1	424	46.268	5.55	Not Found	Not Found	High	High	High	High	High	High	High	High	High	High	High	High		254.743	17
False	High	IsMasterProtein	TRINITY_DN4622_c0_g1_i14.p1	type:complete gc:universal TRINITY_DN4622_c0_g1_i14:234-3575(+)	False	0	115.008	24.6181	24	146	24	1	1113	123.219	5.94	High	High	High	High	High	High	High	High	High	High	High	High	High	High		396.17	24
False	High	IsMasterProtein	TRINITY_DN156_c0_g1_i30.p1	type:5prime_partial gc:universal TRINITY_DN156_c0_g1_i30:1646-69(-)	False	0	110.792	25.1429	15	146	3	1	525	59.305	7.15	Not Found	Not Found	High	High	High	High	High	High	Not Found	Not Found	High	High	Not Found	Not Found		330.442	15
False	High	IsMasterProtein	TRINITY_DN2849_c0_g1_i20.p1	type:complete gc:universal TRINITY_DN2849_c0_g1_i20:77-2356(+)	False	0	109.74	29.3808	18	145	17	1	759	82.444	5.71	High	High	High	High	High	High	High	High	High	High	High	High	High	High		379.755	18
False	High	IsMasterProtein	TRINITY_DN1376_c0_g1_i2.p1	type:5prime_partial gc:universal TRINITY_DN1376_c0_g1_i2:2786-588(-)	False	0	109.057	36.612	21	143	21	1	732	79.565	6.38	High	High	High	High	High	High	High	High	High	High	High	High	High	High		329.19	21
False	High	IsMasterProtein	TRINITY_DN946_c0_g1_i7.p1	type:complete gc:universal TRINITY_DN946_c0_g1_i7:4021-59(-)	False	0	108.72	21.2121	25	142	25	1	1320	147.21	6.49	High	High	High	High	High	High	High	High	High	High	High	High	High	High		282.449	25
False	High	IsMasterProtein	TRINITY_DN171_c0_g1_i2.p1	type:3prime_partial gc:universal TRINITY_DN171_c0_g1_i2:258-2468(+)	False	0	107.828	28.9009	17	141	16	1	737	84.828	6.77	High	High	High	High	High	High	High	High	High	High	High	High	High	High		507.098	17
False	High	IsMasterProtein	TRINITY_DN3057_c1_g1_i2.p1	type:complete gc:universal TRINITY_DN3057_c1_g1_i2:2993-129(-)	False	0	106.727	19.6017	16	141	16	1	954	108.692	5.66	High	High	High	High	High	High	High	High	High	High	High	High	High	High		463.611	16
False	High	IsMasterProtein	Cont_Q04695	Keratin, type I cytoskeletal 17 OS=Homo sapiens OX=9606 GN=KRT17 PE=1 SV=2	True	0	105.225	53.4722	27	140	6	1	432	48.076	5.02	Not Found	Not Found	High	High	Not Found	Not Found	Not Found	Not Found	High	High	High	High	High	High		496.779	27
False	High	IsMasterProtein	TRINITY_DN2082_c1_g2_i1.p1	type:3prime_partial gc:universal TRINITY_DN2082_c1_g2_i1:342-1820(+)	False	0	104.749	36.714	19	139	16	1	493	55.777	8.07	High	High	High	High	High	High	High	High	High	High	High	High	High	High		415.898	19
False	High	IsMasterProtein	TRINITY_DN19953_c0_g1_i2.p1	type:complete gc:universal TRINITY_DN19953_c0_g1_i2:239-1909(+)	False	0	104.297	36.5108	18	138	18	1	556	59.844	9.17	High	High	High	High	High	High	High	High	High	High	High	High	High	High		335.654	18
False	High	IsMasterProtein	TRINITY_DN3812_c0_g1_i5.p1	type:5prime_partial gc:universal TRINITY_DN3812_c0_g1_i5:1680-151(-)	False	0	101.579	28.8802	12	135	12	1	509	56.637	5.3	Not Found	Not Found	High	High	High	High	High	High	Not Found	Not Found	High	High	Not Found	Not Found		246.899	12
False	High	IsMasterProtein	TRINITY_DN2247_c0_g1_i11.p1	type:complete gc:universal TRINITY_DN2247_c0_g1_i11:205-1671(+)	False	0	100.962	56.3525	20	132	12	1	488	52.179	5.71	Not Found	Not Found	High	High	High	Not Found	High	High	Not Found	Not Found	High	Not Found	Not Found	Not Found		205.696	20
False	High	IsMasterProtein	TRINITY_DN2814_c0_g1_i1.p1	type:complete gc:universal TRINITY_DN2814_c0_g1_i1:178-1698(+)	False	0	100.824	36.3636	16	130	16	1	506	58.709	8.68	High	High	High	High	High	High	High	High	High	High	High	High	High	High		364.947	16
False	High	IsMasterProtein	TRINITY_DN1682_c0_g1_i8.p1	type:complete gc:universal TRINITY_DN1682_c0_g1_i8:1578-58(-)	False	0	100.514	38.7352	16	126	7	1	506	57.573	4.92	Not Found	Not Found	High	High	Not Found	Not Found	High	High	Not Found	Not Found	Not Found	Not Found	Not Found	Not Found		200.718	16
False	High	IsMasterProtein	Cont_Q922U2	Keratin, type II cytoskeletal 5 OS=Mus musculus OX=10090 GN=Krt5 PE=1 SV=1	True	0	98.4682	25	21	126	1	1	580	61.729	7.75	Not Found	Not Found	Not Found	Not Found	Not Found	Not Found	Not Found	Not Found	Not Found	High	Not Found	Not Found	Not Found	Not Found		529.535	21
False	High	IsMasterProtein	TRINITY_DN5239_c0_g1_i12.p1	type:complete gc:universal TRINITY_DN5239_c0_g1_i12:3118-767(-)	False	0	97.4218	26.8199	14	126	14	1	783	89.111	5.16	Not Found	Not Found	High	High	High	High	High	High	High	High	High	High	Not Found	Not Found		253.507	14
False	High	IsMasterProtein	TRINITY_DN2687_c0_g1_i13.p1	type:complete gc:universal TRINITY_DN2687_c0_g1_i13:4908-3025(-)	False	0	97.2207	32.0574	18	126	18	1	627	68.205	8.62	High	High	High	High	High	High	High	High	High	High	High	High	High	High		470.753	18
False	High	IsMasterProtein	TRINITY_DN13610_c0_g1_i1.p1	type:5prime_partial gc:universal TRINITY_DN13610_c0_g1_i1:3-1457(+)	False	0	95.9781	24.7934	11	121	11	1	484	55.333	4.83	Not Found	Not Found	High	High	High	Not Found	High	High	Not Found	Not Found	High	High	Not Found	Not Found		212.01	11
False	High	IsMasterProtein	TRINITY_DN1559_c0_g2_i16.p1	type:complete gc:universal TRINITY_DN1559_c0_g2_i16:287-1819(+)	False	0	95.2541	44.7059	18	120	15	1	510	55.424	7.8	Not Found	Not Found	High	High	Not Found	Not Found	High	High	Not Found	Not Found	High	High	Not Found	Not Found		198.025	18
False	High	IsMasterProtein	TRINITY_DN4925_c0_g1_i1.p1	type:complete gc:universal TRINITY_DN4925_c0_g1_i1:3426-1363(-)	False	0	94.1052	36.6812	19	119	19	1	687	77.293	5.83	Not Found	Not Found	High	High	High	High	High	High	Not Found	Not Found	High	High	Not Found	Not Found		182.913	19
False	High	IsMasterProtein	TRINITY_DN4849_c0_g1_i15.p1	type:complete gc:universal TRINITY_DN4849_c0_g1_i15:1425-37(-)	False	0	94.0141	30.303	15	118	11	1	462	52.529	7.65	High	High	High	High	High	High	High	High	High	High	High	High	High	High		410.157	15
False	High	IsMasterProtein	TRINITY_DN7_c1_g1_i5.p1	type:complete gc:universal TRINITY_DN7_c1_g1_i5:161-2947(+)	False	0	92.916	25.6466	19	116	19	1	928	105.682	6.21	High	High	High	High	High	High	High	High	High	High	High	High	High	High		272.023	19
False	High	IsMasterProtein	TRINITY_DN676_c0_g1_i12.p1	type:complete gc:universal TRINITY_DN676_c0_g1_i12:71-1471(+)	False	0	92.2076	31.5451	13	115	13	1	466	52.575	6.54	Not Found	Not Found	Not Found	High	High	High	High	Not Found	Not Found	Not Found	High	High	Not Found	Not Found		209.531	13
False	High	IsMasterProtein	TRINITY_DN985_c0_g1_i2.p1	type:complete gc:universal TRINITY_DN985_c0_g1_i2:45-1352(+)	False	0	92.0815	41.6092	16	112	16	1	435	49.092	5.74	High	High	High	High	High	High	High	High	High	High	High	High	High	High		480.582	16
False	High	IsMasterProtein	TRINITY_DN3297_c0_g1_i2.p1	type:5prime_partial gc:universal TRINITY_DN3297_c0_g1_i2:2-1564(+)	False	0	91.8613	33.2692	15	111	13	1	520	58.611	5.96	High	High	High	High	Not Found	Not Found	High	High	High	High	High	High	High	Not Found		216.1	15
False	High	IsMasterProtein	TRINITY_DN4293_c0_g2_i2.p1	type:complete gc:universal TRINITY_DN4293_c0_g2_i2:5097-1696(-)	False	0	91.3502	20.2118	23	110	23	1	1133	131.449	7.27	High	High	High	High	High	High	High	High	High	High	High	High	High	High		288.562	23
False	High	IsMasterProtein	TRINITY_DN598_c0_g2_i12.p1	type:complete gc:universal TRINITY_DN598_c0_g2_i12:13977-10498(-)	False	0	90.1524	21.0526	18	109	18	1	1159	127.375	7.84	High	High	High	High	High	High	High	High	High	High	High	High	High	High		243.894	18
False	High	IsMasterProtein	TRINITY_DN1138_c0_g1_i13.p1	type:complete gc:universal TRINITY_DN1138_c0_g1_i13:2443-716(-)	False	0	89.9549	30.7826	19	109	19	1	575	67.398	6.3	Not Found	Not Found	High	High	Not Found	Not Found	High	High	Not Found	Not Found	Not Found	Not Found	Not Found	Not Found		177.696	19
False	High	IsMasterProtein	TRINITY_DN1849_c0_g1_i2.p1	type:complete gc:universal TRINITY_DN1849_c0_g1_i2:1640-123(-)	False	0	89.6722	33.0693	16	109	15	1	505	57.731	8.47	High	High	High	High	Not Found	High	High	High	High	High	High	High	High	High		206.222	16
False	High	IsMasterProtein	TRINITY_DN1385_c0_g1_i1.p1	type:complete gc:universal TRINITY_DN1385_c0_g1_i1:2728-437(-)	False	0	89.4017	34.4692	20	109	20	1	763	82.254	9.36	High	High	High	High	High	High	High	High	High	Not Found	High	High	Not Found	Not Found		218.623	20
False	High	IsMasterProtein	TRINITY_DN296_c0_g1_i11.p1	type:5prime_partial gc:universal TRINITY_DN296_c0_g1_i11:5372-3867(-)	False	0	88.1206	28.9421	11	108	11	1	501	57.155	6.68	Not Found	Not Found	High	High	High	High	High	High	Not Found	Not Found	High	High	Not Found	Not Found		316.215	11
False	High	IsMasterProtein	Cont_Q9QWL7	Keratin, type I cytoskeletal 17 OS=Mus musculus OX=10090 GN=Krt17 PE=1 SV=3	True	0	86.9413	39.9538	21	107	1	1	433	48.132	5.06	Not Found	Not Found	Not Found	Not Found	Not Found	Not Found	Not Found	Not Found	High	High	Not Found	Not Found	Not Found	Not Found		503.227	21
False	High	IsMasterProtein	TRINITY_DN2355_c0_g1_i1.p1	type:complete gc:universal TRINITY_DN2355_c0_g1_i1:394-1905(+)	False	0	86.6469	25.8449	12	106	12	1	503	57.522	6.99	Not Found	Not Found	High	High	Not Found	High	High	High	Not Found	Not Found	Not Found	Not Found	Not Found	Not Found		203.129	12
False	High	IsMasterProtein	TRINITY_DN8047_c0_g1_i2.p1	type:complete gc:universal TRINITY_DN8047_c0_g1_i2:2073-484(-)	False	0	85.8262	26.465	15	104	15	1	529	58.639	8.12	Not Found	Not Found	High	High	High	High	High	Not Found	Not Found	Not Found	High	High	Not Found	Not Found		160.912	15
False	High	IsMasterProtein	TRINITY_DN2027_c0_g1_i1.p1	type:complete gc:universal TRINITY_DN2027_c0_g1_i1:218-1294(+)	False	0	82.3632	36.8715	14	103	14	1	358	39.207	8.69	High	High	High	High	High	High	High	High	High	High	High	High	High	High		416.305	14
False	High	IsMasterProtein	TRINITY_DN7618_c0_g1_i1.p1	type:5prime_partial gc:universal TRINITY_DN7618_c0_g1_i1:2-2125(+)	False	0	81.3556	27.157	19	102	19	1	707	84.582	6.23	High	High	High	High	High	High	High	High	High	High	High	High	High	High		194.662	19
False	High	IsMasterProtein	TRINITY_DN5872_c0_g1_i12.p1	type:complete gc:universal TRINITY_DN5872_c0_g1_i12:78-1538(+)	False	0	81.1085	34.5679	15	100	6	1	486	52.575	6.7	Not Found	Not Found	High	High	Not Found	Not Found	High	High	Not Found	Not Found	Not Found	High	Not Found	Not Found		197.565	15
False	High	IsMasterProtein	TRINITY_DN3866_c0_g1_i10.p1	type:complete gc:universal TRINITY_DN3866_c0_g1_i10:246-1607(+)	False	0	80.2155	28.4768	12	96	5	1	453	50.847	4.93	High	High	High	High	High	High	High	High	Not Found	Not Found	High	High	Not Found	Not Found		149.405	12
False	High	IsMasterProtein	Cont_P68103	Elongation factor 1-alpha 1 OS=Bos taurus OX=9913 GN=EEF1A1 PE=1 SV=1	True	0	80.0833	26.1905	8	92	3	1	462	50.109	9.01	High	High	High	High	High	High	High	High	Not Found	High	High	Not Found	High	Not Found		259.659	8
False	High	IsMasterProtein	Cont_Q7Z794	Keratin, type II cytoskeletal 1b OS=Homo sapiens OX=9606 GN=KRT77 PE=1 SV=3	True	0	79.9855	34.6021	21	90	15	1	578	61.864	5.99	High	High	High	High	High	High	High	High	High	High	High	High	High	Not Found		298.251	21
False	High	IsMasterProtein	TRINITY_DN3162_c0_g1_i13.p1	type:complete gc:universal TRINITY_DN3162_c0_g1_i13:1835-225(-)	False	0	79.6071	40.4851	16	89	16	1	536	57.473	6.73	Not Found	Not Found	High	High	Not Found	Not Found	High	High	Not Found	Not Found	High	High	Not Found	Not Found		164.99	16
False	High	IsMasterProtein	TRINITY_DN7443_c0_g1_i1.p1	type:complete gc:universal TRINITY_DN7443_c0_g1_i1:2127-691(-)	False	0	79.4819	29.2887	10	89	10	1	478	51.963	8.12	Not Found	Not Found	High	High	High	High	High	High	Not Found	Not Found	High	High	Not Found	Not Found		211.517	10
False	High	IsMasterProtein	TRINITY_DN3025_c0_g1_i13.p1	type:complete gc:universal TRINITY_DN3025_c0_g1_i13:1090-4167(+)	False	0	79.4249	22.2439	21	87	21	1	1025	112.455	5.39	High	High	High	High	High	High	High	High	High	High	High	High	High	High		236.695	21
False	High	IsMasterProtein	TRINITY_DN17494_c0_g2_i2.p1	type:complete gc:universal TRINITY_DN17494_c0_g2_i2:2510-1020(-)	False	0	79.3793	35.0806	17	87	17	1	496	55.717	5.64	High	High	High	High	High	High	High	High	High	High	High	High	Not Found	Not Found		272.429	17
False	High	IsMasterProtein	TRINITY_DN2389_c0_g1_i10.p1	type:complete gc:universal TRINITY_DN2389_c0_g1_i10:3961-218(-)	False	0	78.7081	12.2694	14	87	14	1	1247	138.508	4.87	High	High	High	High	High	High	High	High	High	High	Not Found	Not Found	High	High		162.852	14
False	High	IsMasterProtein	TRINITY_DN6729_c0_g1_i1.p1	type:complete gc:universal TRINITY_DN6729_c0_g1_i1:128-2662(+)	False	0	78.5635	19.7867	17	85	17	1	844	94.628	6.64	High	Not Found	High	High	High	High	High	High	High	High	High	High	Not Found	Not Found		133.503	17
False	High	IsMasterProtein	Cont_P02769	Albumin OS=Bos taurus OX=9913 GN=ALB PE=1 SV=4	True	0	78.0345	31.4662	18	84	18	1	607	69.248	6.18	High	High	High	High	High	High	High	High	High	High	High	High	High	High		228.944	18
False	High	IsMasterProtein	TRINITY_DN611_c0_g1_i11.p1	type:5prime_partial gc:universal TRINITY_DN611_c0_g1_i11:2-706(+)	False	0	77.8166	69.6581	13	83	3	1	234	27.373	6.9	Not Found	Not Found	High	High	Not Found	Not Found	High	High	Not Found	Not Found	Not Found	Not Found	Not Found	Not Found		201.415	13
False	High	IsMasterProtein	TRINITY_DN2668_c0_g1_i2.p1	type:complete gc:universal TRINITY_DN2668_c0_g1_i2:183-1688(+)	False	0	77.7728	31.5369	15	82	14	1	501	56.042	6.93	Not Found	Not Found	High	High	Not Found	Not Found	High	High	Not Found	Not Found	High	High	Not Found	Not Found		182.152	15
False	High	IsMasterProtein	TRINITY_DN156_c0_g1_i15.p1	type:5prime_partial gc:universal TRINITY_DN156_c0_g1_i15:1809-232(-)	False	0	77.5635	21.9048	13	82	1	1	525	59.259	7.03	Not Found	Not Found	High	High	Not Found	Not Found	Not Found	Not Found	Not Found	Not Found	Not Found	Not Found	Not Found	Not Found		210.307	13
False	High	IsMasterProtein	TRINITY_DN21_c0_g1_i6.p1	type:5prime_partial gc:universal TRINITY_DN21_c0_g1_i6:3457-584(-)	False	0	77.5127	21.4211	16	81	16	1	957	107.821	5.27	High	High	High	High	High	High	High	High	High	High	High	High	High	Not Found		231.774	16
False	High	IsMasterProtein	TRINITY_DN156_c0_g1_i4.p1	type:5prime_partial gc:universal TRINITY_DN156_c0_g1_i4:2174-594(-)	False	0	77.1908	21.673	13	81	1	1	526	59.683	8.02	Not Found	High	Not Found	Not Found	High	High	High	High	Not Found	Not Found	Not Found	Not Found	Not Found	Not Found		183.04	13
False	High	IsMasterProtein	TRINITY_DN2532_c0_g1_i1.p1	type:complete gc:universal TRINITY_DN2532_c0_g1_i1:227-1747(+)	False	0	76.7793	30.6324	18	81	18	1	506	55.138	7.97	Not Found	Not Found	High	High	Not Found	Not Found	High	High	Not Found	Not Found	High	High	Not Found	Not Found		142.452	18
False	High	IsMasterProtein	TRINITY_DN335_c0_g1_i10.p1	type:complete gc:universal TRINITY_DN335_c0_g1_i10:273-2219(+)	False	0	76.6841	27.1605	17	81	17	1	648	72.533	8.57	Not Found	Not Found	High	High	High	High	High	High	Not Found	Not Found	High	High	Not Found	Not Found		165.784	17
False	High	IsMasterProtein	TRINITY_DN2040_c0_g1_i1.p1	type:complete gc:universal TRINITY_DN2040_c0_g1_i1:1636-62(-)	False	0	76.3955	30.916	11	80	10	1	524	58.455	8.07	High	High	High	High	High	High	High	High	High	High	High	High	High	Not Found		149.477	11
False	High	IsMasterProtein	TRINITY_DN2508_c0_g1_i1.p1	type:5prime_partial gc:universal TRINITY_DN2508_c0_g1_i1:3-905(+)	False	0	76.2454	38.6667	9	78	9	1	300	33.963	5.54	High	High	Not Found	Not Found	Not Found	Not Found	Not Found	Not Found	High	High	Not Found	Not Found	High	High		145.232	9
False	High	IsMasterProtein	TRINITY_DN4480_c0_g1_i7.p1	type:complete gc:universal TRINITY_DN4480_c0_g1_i7:2267-756(-)	False	0	76.1434	39.3638	15	77	15	1	503	54.235	8.21	Not Found	Not Found	Not Found	Not Found	High	High	Not Found	Not Found	Not Found	Not Found	High	High	Not Found	Not Found		111.552	15
False	High	IsMasterProtein	TRINITY_DN3200_c0_g1_i1.p1	type:complete gc:universal TRINITY_DN3200_c0_g1_i1:1696-32(-)	False	0	75.4846	27.7978	11	77	11	1	554	63.458	7.81	Not Found	Not Found	High	High	High	High	High	Not Found	Not Found	Not Found	High	High	Not Found	Not Found		118.681	11
False	High	IsMasterProtein	TRINITY_DN7766_c0_g1_i3.p1	type:internal gc:universal TRINITY_DN7766_c0_g1_i3:807-1(-)	False	0	75.2286	44.9814	12	77	5	1	269	30.925	5.92	Not Found	Not Found	High	High	Not Found	Not Found	High	High	Not Found	Not Found	High	High	Not Found	Not Found		217.703	12
False	High	IsMasterProtein	Cont_P13646	Keratin, type I cytoskeletal 13 OS=Homo sapiens OX=9606 GN=KRT13 PE=1 SV=4	True	0	74.8415	30.3493	16	77	7	1	458	49.557	4.96	High	High	High	High	High	High	High	High	High	High	Not Found	Not Found	High	High		441.747	16
False	High	IsMasterProtein	TRINITY_DN386_c1_g1_i1.p1	type:complete gc:universal TRINITY_DN386_c1_g1_i1:266-2422(+)	False	0	74.7513	27.9944	17	77	17	1	718	80.19	5.48	Not Found	Not Found	High	High	High	High	High	High	Not Found	Not Found	High	High	Not Found	Not Found		164.85	17
False	High	IsMasterProtein	TRINITY_DN3544_c0_g1_i5.p1	type:complete gc:universal TRINITY_DN3544_c0_g1_i5:2486-474(-)	False	0	74.693	26.5672	17	76	14	1	670	75.42	6.8	Not Found	Not Found	High	High	High	High	High	High	Not Found	Not Found	High	High	Not Found	Not Found		155.104	17
False	High	IsMasterProtein	TRINITY_DN14441_c0_g1_i1.p2	type:complete gc:universal TRINITY_DN14441_c0_g1_i1:294-605(+)	False	0	73.8758	57.2816	10	76	10	1	103	11.374	11.36	High	High	High	High	High	High	High	High	High	High	High	High	High	High		234.558	10
False	High	IsMasterProtein	Cont_P19013	Keratin, type II cytoskeletal 4 OS=Homo sapiens OX=9606 GN=KRT4 PE=1 SV=5	True	0	73.7291	39.2308	21	76	12	1	520	56.109	6.61	High	High	High	High	High	High	Not Found	Not Found	High	High	Not Found	Not Found	High	High		237.499	21
False	High	IsMasterProtein	TRINITY_DN185_c6_g1_i1.p1	type:complete gc:universal TRINITY_DN185_c6_g1_i1:3038-285(-)	False	0	73.6386	23.7732	19	76	19	1	917	103.631	6.98	Not Found	Not Found	High	High	High	High	High	High	Not Found	High	High	High	Not Found	Not Found		177.501	19
False	High	IsMasterProtein	TRINITY_DN611_c0_g1_i15.p1	type:5prime_partial gc:universal TRINITY_DN611_c0_g1_i15:2-1057(+)	False	0	73.6314	45.8689	14	76	2	1	351	40.486	5.74	Not Found	Not Found	High	High	Not Found	Not Found	High	High	Not Found	High	High	High	Not Found	Not Found		218.743	14
False	High	IsMasterProtein	TRINITY_DN3652_c0_g1_i8.p1	type:complete gc:universal TRINITY_DN3652_c0_g1_i8:180-1613(+)	False	0	73.4454	32.4948	13	76	13	1	477	54.85	8.78	Not Found	Not Found	High	High	High	High	High	High	Not Found	Not Found	High	High	Not Found	Not Found		187.198	13
False	High	IsMasterProtein	TRINITY_DN2265_c0_g1_i16.p1	type:complete gc:universal TRINITY_DN2265_c0_g1_i16:1499-27(-)	False	0	72.8558	21.4286	12	75	12	1	490	56.207	8.65	Not Found	Not Found	High	High	High	High	High	High	Not Found	Not Found	High	High	Not Found	Not Found		141.454	12
False	High	IsMasterProtein	TRINITY_DN3928_c0_g1_i1.p1	type:complete gc:universal TRINITY_DN3928_c0_g1_i1:2206-341(-)	False	0	72.5103	29.9517	16	75	16	1	621	66.248	8.35	Not Found	High	High	High	High	High	High	High	Not Found	Not Found	High	High	Not Found	Not Found		160.404	16
False	High	IsMasterProtein	TRINITY_DN3959_c0_g1_i1.p1	type:complete gc:universal TRINITY_DN3959_c0_g1_i1:1081-2691(+)	False	0	70.8875	28.9179	12	74	12	1	536	57.769	7.25	High	High	High	High	High	High	High	High	Not Found	Not Found	High	High	Not Found	High		140.299	12
False	High	IsMasterProtein	TRINITY_DN962_c0_g1_i13.p1	type:complete gc:universal TRINITY_DN962_c0_g1_i13:2067-553(-)	False	0	70.5787	31.1508	12	72	12	1	504	56.467	6.42	Not Found	Not Found	High	High	High	High	High	High	High	High	High	High	Not Found	Not Found		160.15	12
False	High	IsMasterProtein	TRINITY_DN300_c0_g1_i1.p1	type:complete gc:universal TRINITY_DN300_c0_g1_i1:65-1498(+)	False	0	70.3293	39.6226	16	72	16	1	477	51.939	8.16	Not Found	Not Found	High	High	High	High	High	High	Not Found	Not Found	High	High	Not Found	Not Found		176.036	16
False	High	IsMasterProtein	TRINITY_DN2817_c0_g1_i1.p1	type:complete gc:universal TRINITY_DN2817_c0_g1_i1:224-3019(+)	False	0	70.1511	22.6638	20	72	20	1	931	102.843	7.21	Not Found	Not Found	High	High	Not Found	Not Found	High	High	Not Found	Not Found	High	High	Not Found	Not Found		109.185	20
False	High	IsMasterProtein	TRINITY_DN833_c0_g1_i1.p1	type:complete gc:universal TRINITY_DN833_c0_g1_i1:3564-1039(-)	False	0	69.9513	19.2628	14	70	14	1	841	96.469	6.44	Not Found	Not Found	High	High	Not Found	Not Found	High	High	Not Found	Not Found	Not Found	Not Found	Not Found	Not Found		115.533	14
False	High	IsMasterProtein	TRINITY_DN1336_c0_g1_i12.p1	type:complete gc:universal TRINITY_DN1336_c0_g1_i12:139-1710(+)	False	0	69.781	16.826	7	70	7	1	523	58.298	9.31	Not Found	Not Found	High	High	Not Found	High	High	High	High	Not Found	High	Not Found	Not Found	Not Found		167.459	7
False	High	IsMasterProtein	TRINITY_DN5620_c1_g1_i13.p1	type:complete gc:universal TRINITY_DN5620_c1_g1_i13:1905-637(-)	False	0	69.3778	29.1469	10	70	10	1	422	49.27	8.24	High	High	High	High	High	High	Not Found	Not Found	High	High	High	High	High	High	Acetyl [N-Term]	168.605	10
False	High	IsMasterProtein	TRINITY_DN5891_c0_g1_i2.p1	type:5prime_partial gc:universal TRINITY_DN5891_c0_g1_i2:3-1529(+)	False	0	69.3308	27.3622	12	69	10	1	508	57.634	5.99	Not Found	Not Found	High	High	Not Found	Not Found	High	High	Not Found	Not Found	High	Not Found	Not Found	Not Found		109.149	12
False	High	IsMasterProtein	TRINITY_DN2006_c0_g2_i2.p1	type:5prime_partial gc:universal TRINITY_DN2006_c0_g2_i2:1385-282(-)	False	0	66.9965	40.5995	12	68	12	1	367	40.747	6.89	Not Found	Not Found	High	High	High	High	High	High	High	High	High	High	Not Found	High		153.683	12
False	High	IsMasterProtein	TRINITY_DN900_c0_g1_i5.p1	type:complete gc:universal TRINITY_DN900_c0_g1_i5:4720-3338(-)	False	0	66.299	35.4348	14	68	14	1	460	50.463	7.78	High	High	High	High	High	High	High	High	High	High	High	High	High	High		307.827	14
False	High	IsMasterProtein	Cont_P00761	Trypsin OS=Sus scrofa OX=9823 PE=1 SV=1	True	0	65.9937	25.1082	5	68	5	1	231	24.394	7.18	High	High	High	High	High	High	High	High	High	High	High	High	High	High		569.505	5
False	High	IsMasterProtein	Cont_Q3SY84	Keratin, type II cytoskeletal 71 OS=Homo sapiens OX=9606 GN=KRT71 PE=1 SV=3	True	0	65.693	28.2983	16	67	9	1	523	57.256	6.61	High	High	High	High	High	High	High	High	High	High	High	High	High	High		400.885	16
False	High	IsMasterProtein	TRINITY_DN420_c0_g1_i1.p1	type:complete gc:universal TRINITY_DN420_c0_g1_i1:85-1578(+)	False	0	65.5147	27.9678	15	67	15	1	497	56.896	5.38	Not Found	Not Found	High	High	Not Found	Not Found	High	High	Not Found	Not Found	High	High	Not Found	Not Found		161.507	15
False	High	IsMasterProtein	TRINITY_DN1635_c0_g1_i5.p1	type:complete gc:universal TRINITY_DN1635_c0_g1_i5:1564-83(-)	False	0	64.8663	28.6004	13	67	13	1	493	55.965	5.26	High	High	High	High	High	High	High	High	High	High	High	High	High	High		182.217	13
False	High	IsMasterProtein	TRINITY_DN3230_c0_g2_i2.p1	type:complete gc:universal TRINITY_DN3230_c0_g2_i2:2814-850(-)	False	0	64.788	19.7248	12	66	12	1	654	71.506	6.8	Not Found	Not Found	High	High	High	High	High	High	Not Found	Not Found	High	High	Not Found	Not Found		144.864	12
False	High	IsMasterProtein	TRINITY_DN1188_c0_g1_i7.p1	type:complete gc:universal TRINITY_DN1188_c0_g1_i7:323-1525(+)	False	0	63.7693	36.5	14	66	14	1	400	43.815	6.01	Not Found	Not Found	High	High	High	High	High	High	High	High	High	High	Not Found	Not Found		156.134	14
False	High	IsMasterProtein	TRINITY_DN2657_c0_g1_i4.p1	type:complete gc:universal TRINITY_DN2657_c0_g1_i4:2529-568(-)	False	0	63.3866	23.8897	15	66	15	1	653	74.449	8.16	Not Found	Not Found	High	High	High	High	High	High	Not Found	Not Found	High	High	Not Found	Not Found		98.771	15
False	High	IsMasterProtein	TRINITY_DN1731_c0_g1_i6.p1	type:complete gc:universal TRINITY_DN1731_c0_g1_i6:4807-1067(-)	False	0	63.0332	15.008	15	65	15	1	1246	138.746	6.16	High	High	Not Found	Not Found	High	High	Not Found	Not Found	High	High	Not Found	Not Found	High	High		121.335	15
False	High	IsMasterProtein	TRINITY_DN1632_c0_g1_i1.p1	type:complete gc:universal TRINITY_DN1632_c0_g1_i1:2047-596(-)	False	0	62.6165	26.7081	9	65	9	1	483	52.81	8.16	Not Found	Not Found	Not Found	High	High	High	Not Found	Not Found	Not Found	Not Found	High	High	Not Found	Not Found		111.629	9
False	High	IsMasterProtein	TRINITY_DN7619_c0_g1_i1.p1	type:complete gc:universal TRINITY_DN7619_c0_g1_i1:49-1809(+)	False	0	61.7988	31.7406	17	65	16	1	586	67.058	5.67	Not Found	Not Found	High	High	High	High	Not Found	High	Not Found	Not Found	High	High	Not Found	Not Found		137.409	17
False	High	IsMasterProtein	TRINITY_DN1673_c0_g1_i4.p1	type:complete gc:universal TRINITY_DN1673_c0_g1_i4:1647-46(-)	False	0	61.7838	27.0169	15	64	15	1	533	61.527	7.18	High	High	High	High	High	High	High	High	High	High	High	High	High	High		174.855	15
False	High	IsMasterProtein	TRINITY_DN6552_c0_g1_i1.p1	type:complete gc:universal TRINITY_DN6552_c0_g1_i1:2497-677(-)	False	0	61.6706	24.7525	12	64	12	1	606	65.914	6.61	High	High	High	High	High	Not Found	High	High	High	Not Found	High	High	Not Found	Not Found		158.878	12
False	High	IsMasterProtein	TRINITY_DN1818_c0_g1_i1.p1	type:complete gc:universal TRINITY_DN1818_c0_g1_i1:96-1844(+)	False	0	60.8319	26.2887	11	64	11	1	582	66.153	5.44	Not Found	Not Found	High	High	High	High	High	High	High	High	High	High	Not Found	Not Found		124.732	11
False	High	IsMasterProtein	TRINITY_DN631_c0_g1_i12.p1	type:5prime_partial gc:universal TRINITY_DN631_c0_g1_i12:5632-2867(-)	False	0	60.7988	15.6352	11	63	11	1	921	101.414	6.7	High	High	High	High	High	High	High	High	Not Found	High	High	High	High	High		138.253	11
False	High	IsMasterProtein	TRINITY_DN1591_c0_g1_i13.p1	type:complete gc:universal TRINITY_DN1591_c0_g1_i13:110-1519(+)	False	0	60.5964	30.9168	14	62	14	1	469	53.373	6.54	Not Found	Not Found	High	High	Not Found	Not Found	High	High	Not Found	Not Found	Not Found	Not Found	Not Found	Not Found		92.9852	14
False	High	IsMasterProtein	TRINITY_DN1351_c2_g1_i5.p1	type:complete gc:universal TRINITY_DN1351_c2_g1_i5:102-2105(+)	False	0	60.346	25.0375	12	62	12	1	667	74.853	5.92	Not Found	Not Found	High	High	High	High	High	High	Not Found	Not Found	High	High	Not Found	Not Found		112.392	12
False	High	IsMasterProtein	TRINITY_DN1484_c0_g1_i1.p1	type:5prime_partial gc:universal TRINITY_DN1484_c0_g1_i1:1375-80(-)	False	0	60.2227	26.4501	10	62	10	1	431	47.468	6.87	Not Found	Not Found	High	Not Found	High	High	Not Found	Not Found	Not Found	Not Found	High	High	Not Found	Not Found		86.5426	10
False	High	IsMasterProtein	TRINITY_DN4109_c0_g1_i2.p1	type:complete gc:universal TRINITY_DN4109_c0_g1_i2:4569-3082(-)	False	0	60.1713	31.9192	11	62	11	1	495	52.636	8.41	Not Found	Not Found	High	High	Not Found	Not Found	High	High	Not Found	Not Found	Not Found	Not Found	Not Found	Not Found		118.715	11
False	High	IsMasterProtein	TRINITY_DN3574_c0_g2_i1.p1	type:5prime_partial gc:universal TRINITY_DN3574_c0_g2_i1:3-1568(+)	False	0	59.2134	25.9117	11	61	5	1	521	60.251	4.89	Not Found	Not Found	High	High	High	Not Found	High	High	Not Found	Not Found	Not Found	High	Not Found	Not Found		82.0749	11
False	High	IsMasterProtein	TRINITY_DN3619_c0_g1_i12.p1	type:complete gc:universal TRINITY_DN3619_c0_g1_i12:255-1733(+)	False	0	58.276	28.0488	11	60	11	1	492	55.254	5.21	Not Found	Not Found	High	High	High	High	High	High	Not Found	Not Found	High	High	Not Found	Not Found		149.968	11
False	High	IsMasterProtein	TRINITY_DN30853_c0_g1_i2.p1	type:5prime_partial gc:universal TRINITY_DN30853_c0_g1_i2:2-1498(+)	False	0	58.229	29.7189	13	60	12	1	498	53.929	6.73	Not Found	Not Found	High	High	Not Found	Not Found	High	High	Not Found	Not Found	Not Found	Not Found	Not Found	Not Found		110.563	13
False	High	IsMasterProtein	TRINITY_DN5300_c0_g1_i12.p1	type:complete gc:universal TRINITY_DN5300_c0_g1_i12:527-9595(+)	False	0	58.183	6.94904	17	59	17	1	3022	328.157	8.38	High	High	Not Found	Not Found	High	High	Not Found	Not Found	High	High	High	High	High	High		67.0453	17
False	High	IsMasterProtein	Cont_Q9XSJ4	Alpha-enolase OS=Bos taurus OX=9913 GN=ENO1 PE=1 SV=4	True	0	57.9865	22.3502	8	59	8	1	434	47.296	6.8	High	High	High	High	High	High	High	High	High	High	Not Found	Not Found	High	High		166.084	8
False	High	IsMasterProtein	TRINITY_DN959_c0_g1_i2.p1	type:complete gc:universal TRINITY_DN959_c0_g1_i2:81-1706(+)	False	0	57.9071	26.8022	11	58	11	1	541	60.11	5.22	Not Found	Not Found	High	High	High	High	High	High	Not Found	Not Found	High	High	Not Found	Not Found		121.292	11
False	High	IsMasterProtein	TRINITY_DN738_c3_g1_i3.p1	type:complete gc:universal TRINITY_DN738_c3_g1_i3:1763-261(-)	False	0	57.8039	29.4	10	58	10	1	500	57.401	5.95	Not Found	Not Found	High	High	Not Found	Not Found	Not Found	Not Found	Not Found	Not Found	High	High	Not Found	Not Found		71.9286	10
False	High	IsMasterProtein	TRINITY_DN10698_c0_g1_i5.p1	type:5prime_partial gc:universal TRINITY_DN10698_c0_g1_i5:3-1559(+)	False	0	57.2262	25.8687	12	58	9	1	518	58.936	7.68	Not Found	Not Found	High	High	High	High	High	High	Not Found	Not Found	High	High	Not Found	Not Found		112.83	12
False	High	IsMasterProtein	TRINITY_DN2642_c0_g2_i1.p1	type:internal gc:universal TRINITY_DN2642_c0_g2_i1:1203-1(-)	False	0	57.1769	34.6633	11	58	4	1	401	45.591	4.81	Not Found	Not Found	High	High	Not Found	High	High	High	Not Found	Not Found	Not Found	High	Not Found	Not Found		107.479	11
False	High	IsMasterProtein	Cont_P02535	Keratin, type I cytoskeletal 10 OS=Mus musculus OX=10090 GN=Krt10 PE=1 SV=3	True	0	56.9041	25.7895	14	57	2	1	570	57.735	5.11	High	Not Found	Not Found	Not Found	Not Found	Not Found	Not Found	Not Found	Not Found	Not Found	High	High	Not Found	Not Found		688.535	14
False	High	IsMasterProtein	TRINITY_DN3529_c0_g1_i2.p1	type:internal gc:universal TRINITY_DN3529_c0_g1_i2:854-3(-)	False	0	56.8566	36.9718	10	56	4	1	284	32.495	5.4	Not Found	Not Found	High	High	Not Found	Not Found	High	High	Not Found	Not Found	Not Found	High	Not Found	Not Found		176.245	10
False	High	IsMasterProtein	Cont_Q9Z2K1	Keratin, type I cytoskeletal 16 OS=Mus musculus OX=10090 GN=Krt16 PE=1 SV=3	True	0	56.1424	21.5352	12	56	1	1	469	51.574	5.2	Not Found	High	Not Found	Not Found	Not Found	Not Found	Not Found	Not Found	Not Found	Not Found	Not Found	Not Found	Not Found	Not Found		402.392	12
False	High	IsMasterProtein	TRINITY_DN20715_c0_g2_i3.p1	type:complete gc:universal TRINITY_DN20715_c0_g2_i3:4279-410(-)	False	0	56.0877	14.2746	14	56	14	1	1289	142.364	9.13	High	High	Not Found	Not Found	Not Found	Not Found	Not Found	Not Found	High	High	Not Found	Not Found	High	High		99.2	14
False	High	IsMasterProtein	TRINITY_DN137_c0_g1_i10.p1	type:complete gc:universal TRINITY_DN137_c0_g1_i10:1792-521(-)	False	0	55.9522	28.8416	12	56	12	1	423	47.964	7.69	High	High	High	High	High	High	High	High	High	High	High	High	High	High		233.447	12
False	High	IsMasterProtein	TRINITY_DN2095_c0_g1_i1.p1	type:complete gc:universal TRINITY_DN2095_c0_g1_i1:2677-1352(-)	False	0	55.4994	26.3039	10	56	10	1	441	49.333	8.29	Not Found	Not Found	High	Not Found	High	High	High	High	Not Found	Not Found	High	High	Not Found	Not Found		108.768	10
False	High	IsMasterProtein	TRINITY_DN2434_c0_g1_i1.p1	type:5prime_partial gc:universal TRINITY_DN2434_c0_g1_i1:1918-299(-)	False	0	55.2555	28.9425	14	56	14	1	539	60.213	6.99	Not Found	Not Found	High	High	Not Found	Not Found	High	High	Not Found	Not Found	High	Not Found	Not Found	Not Found		124.584	14
False	High	IsMasterProtein	Cont_Q86YZ3	Hornerin OS=Homo sapiens OX=9606 GN=HRNR PE=1 SV=2	True	0	54.961	11.5789	8	55	8	1	2850	282.228	10.04	High	High	High	High	High	High	High	High	High	High	High	High	High	High		148.447	8
False	High	IsMasterProtein	TRINITY_DN3763_c0_g1_i10.p1	type:3prime_partial gc:universal TRINITY_DN3763_c0_g1_i10:1475-3(-)	False	0	54.7867	26.6802	13	54	13	1	491	56.134	6.49	Not Found	Not Found	High	High	High	High	High	High	High	High	High	High	Not Found	Not Found		108.842	13
False	High	IsMasterProtein	Cont_Q5D862	Filaggrin-2 OS=Homo sapiens OX=9606 GN=FLG2 PE=1 SV=1	True	0	54.5929	8.82476	10	54	10	1	2391	247.928	8.31	High	High	High	High	High	High	High	High	High	High	High	High	High	High		154.144	10
False	High	IsMasterProtein	TRINITY_DN2654_c0_g1_i2.p1	type:complete gc:universal TRINITY_DN2654_c0_g1_i2:445-2010(+)	False	0	54.5718	23.6084	12	53	6	1	521	59.858	6.8	Not Found	Not Found	High	High	High	High	High	High	Not Found	Not Found	High	High	Not Found	Not Found		117.9	12
False	High	IsMasterProtein	TRINITY_DN2642_c0_g1_i16.p1	type:internal gc:universal TRINITY_DN2642_c0_g1_i16:1043-3(-)	False	0	54.5386	34.2939	9	53	4	1	347	39.357	4.81	Not Found	Not Found	High	High	Not Found	Not Found	High	High	Not Found	Not Found	Not Found	Not Found	Not Found	Not Found		88.5756	9
False	High	IsMasterProtein	TRINITY_DN6327_c0_g1_i1.p1	type:complete gc:universal TRINITY_DN6327_c0_g1_i1:2293-155(-)	False	0	54.192	17.8371	11	53	11	1	712	81.753	5.03	High	High	High	High	High	High	High	High	High	Not Found	High	High	Not Found	High		113.023	11
False	High	IsMasterProtein	TRINITY_DN24984_c0_g1_i1.p1	type:complete gc:universal TRINITY_DN24984_c0_g1_i1:1474-182(-)	False	0	53.8354	21.8605	10	53	10	1	430	47.365	6.29	Not Found	Not Found	Not Found	Not Found	High	High	Not Found	Not Found	Not Found	Not Found	High	High	Not Found	Not Found		96.4371	10
False	High	IsMasterProtein	TRINITY_DN1354_c0_g1_i10.p1	type:complete gc:universal TRINITY_DN1354_c0_g1_i10:325-1887(+)	False	0	53.5952	24.4231	13	52	11	1	520	59.553	8.46	Not Found	Not Found	High	High	High	High	High	High	Not Found	Not Found	High	High	Not Found	Not Found		138.839	13
False	High	IsMasterProtein	Cont_Q8N1N4	Keratin, type II cytoskeletal 78 OS=Homo sapiens OX=9606 GN=KRT78 PE=1 SV=2	True	0	53.5026	28.4615	12	51	10	1	520	56.83	6.02	High	High	High	High	High	Not Found	High	High	High	High	Not Found	High	High	High		125.839	12
False	High	IsMasterProtein	TRINITY_DN474_c0_g1_i1.p1	type:complete gc:universal TRINITY_DN474_c0_g1_i1:1957-200(-)	False	0	53.4512	26.8376	12	51	11	1	585	65.897	5.8	Not Found	Not Found	High	High	High	High	High	High	Not Found	Not Found	High	High	Not Found	Not Found		105.074	12
False	High	IsMasterProtein	TRINITY_DN426_c0_g1_i1.p1	type:complete gc:universal TRINITY_DN426_c0_g1_i1:1408-26(-)	False	0	53.319	20.8696	10	51	9	1	460	52.248	7.64	High	High	High	High	High	High	High	High	High	Not Found	High	High	High	Not Found		180.992	10
False	High	IsMasterProtein	TRINITY_DN5698_c0_g1_i1.p1	type:internal gc:universal TRINITY_DN5698_c0_g1_i1:1-1341(+)	False	0	53.1874	24.3848	13	50	9	1	447	51.199	6.4	High	High	High	High	High	High	High	High	High	High	High	High	Not Found	High		139.91	13
False	High	IsMasterProtein	Cont_P12035	Keratin, type II cytoskeletal 3 OS=Homo sapiens OX=9606 GN=KRT3 PE=1 SV=3	True	0	53.0548	14.0127	14	50	2	1	628	64.378	6.48	High	High	Not Found	Not Found	Not Found	Not Found	Not Found	High	High	Not Found	Not Found	Not Found	Not Found	Not Found		249.973	14
False	High	IsMasterProtein	TRINITY_DN7145_c0_g1_i1.p1	type:complete gc:universal TRINITY_DN7145_c0_g1_i1:2584-1187(-)	False	0	52.5511	31.828	12	50	12	1	465	51.755	8.75	Not Found	Not Found	High	High	Not Found	Not Found	Not Found	Not Found	Not Found	Not Found	High	High	Not Found	Not Found		73.5285	12
False	High	IsMasterProtein	TRINITY_DN2475_c0_g1_i1.p1	type:3prime_partial gc:universal TRINITY_DN2475_c0_g1_i1:1484-3(-)	False	0	52.1719	18.2186	9	50	7	1	494	55.881	5	High	High	High	High	High	High	High	High	Not Found	High	High	High	Not Found	Not Found		144.096	9
False	High	IsMasterProtein	TRINITY_DN4016_c0_g1_i11.p1	type:complete gc:universal TRINITY_DN4016_c0_g1_i11:1904-42(-)	False	0	51.4604	19.5161	11	49	10	1	620	70.166	4.82	Not Found	Not Found	High	High	Not Found	Not Found	High	High	Not Found	Not Found	Not Found	Not Found	Not Found	Not Found		92.3641	11
False	High	IsMasterProtein	TRINITY_DN28_c0_g1_i2.p1	type:complete gc:universal TRINITY_DN28_c0_g1_i2:282-1655(+)	False	0	50.7715	26.2582	10	49	10	1	457	51.228	5.06	Not Found	Not Found	High	High	High	High	High	High	Not Found	Not Found	Not Found	Not Found	Not Found	Not Found		99.766	10
False	High	IsMasterProtein	Cont_Q6IFZ6	Keratin, type II cytoskeletal 1b OS=Mus musculus OX=10090 GN=Krt77 PE=1 SV=1	True	0	50.2955	14.3357	11	49	3	1	572	61.322	8.02	Not Found	Not Found	High	High	Not Found	Not Found	Not Found	Not Found	High	Not Found	Not Found	Not Found	Not Found	Not Found		273.527	11
False	High	IsMasterProtein	TRINITY_DN344_c0_g4_i1.p1	type:complete gc:universal TRINITY_DN344_c0_g4_i1:2030-69(-)	False	0	49.9409	17.7642	11	49	6	1	653	71.488	5.47	High	Not Found	High	High	Not Found	Not Found	High	High	High	High	High	High	High	Not Found		159.402	11
False	High	IsMasterProtein	TRINITY_DN2261_c0_g1_i1.p1	type:5prime_partial gc:universal TRINITY_DN2261_c0_g1_i1:1862-165(-)	False	0	49.391	21.4159	11	48	10	1	565	64.304	4.94	High	High	High	High	High	High	High	High	High	High	High	High	Not Found	High		153.359	11
False	High	IsMasterProtein	TRINITY_DN795_c0_g2_i1.p1	type:complete gc:universal TRINITY_DN795_c0_g2_i1:359-2032(+)	False	0	49.359	28.5458	11	48	11	1	557	62.824	5.3	Not Found	Not Found	High	High	Not Found	Not Found	Not Found	Not Found	Not Found	Not Found	High	High	Not Found	Not Found		69.6971	11
False	High	IsMasterProtein	TRINITY_DN230_c4_g1_i1.p1	type:5prime_partial gc:universal TRINITY_DN230_c4_g1_i1:2109-931(-)	False	0	49.2468	27.0408	10	48	9	1	392	44.996	6.76	Not Found	Not Found	High	High	High	Not Found	High	High	High	High	High	High	Not Found	High		121.315	10
False	High	IsMasterProtein	Cont_Q8BGZ7	Keratin, type II cytoskeletal 75 OS=Mus musculus OX=10090 GN=Krt75 PE=1 SV=1	True	0	48.9678	21.5971	16	48	4	1	551	59.704	8.31	Not Found	Not Found	Not Found	Not Found	Not Found	Not Found	Not Found	Not Found	High	High	Not Found	Not Found	Not Found	High		247.885	16
False	High	IsMasterProtein	Cont_P08727	Keratin, type I cytoskeletal 19 OS=Homo sapiens OX=9606 GN=KRT19 PE=1 SV=4	True	0	48.9405	22.75	11	47	1	1	400	44.079	5.14	High	High	Not Found	Not Found	High	High	Not Found	Not Found	High	High	High	Not Found	High	High		319.413	11
False	High	IsMasterProtein	TRINITY_DN166_c0_g1_i1.p1	type:complete gc:universal TRINITY_DN166_c0_g1_i1:5242-1139(-)	False	0	48.5023	12.8018	13	47	10	1	1367	152.266	7.24	High	High	High	High	High	Not Found	High	High	High	High	Not Found	Not Found	High	High		130.174	13
False	High	IsMasterProtein	Cont_Q7Z3Y8	Keratin, type I cytoskeletal 27 OS=Homo sapiens OX=9606 GN=KRT27 PE=1 SV=2	True	0	48.2441	20.915	10	46	3	1	459	49.792	5.05	High	High	High	High	High	High	High	High	High	High	High	High	High	Not Found		375.61	10
False	High	IsMasterProtein	TRINITY_DN2942_c0_g1_i1.p1	type:complete gc:universal TRINITY_DN2942_c0_g1_i1:2474-846(-)	False	0	47.8944	19.1882	9	46	9	1	542	60.051	7.43	Not Found	High	High	High	High	High	High	High	Not Found	Not Found	High	High	Not Found	Not Found		95.8225	9
False	High	IsMasterProtein	TRINITY_DN2825_c0_g1_i10.p1	type:5prime_partial gc:universal TRINITY_DN2825_c0_g1_i10:2-1747(+)	False	0	47.8828	23.58	10	45	10	1	581	64.326	8.18	Not Found	Not Found	High	High	High	High	High	High	Not Found	Not Found	High	High	Not Found	Not Found		120.203	10
False	High	IsMasterProtein	TRINITY_DN9351_c0_g1_i1.p1	type:complete gc:universal TRINITY_DN9351_c0_g1_i1:179-1510(+)	False	0	47.752	31.8284	11	45	11	1	443	49.874	5.69	Not Found	Not Found	High	High	High	High	High	High	Not Found	Not Found	High	High	Not Found	Not Found	Acetyl [N-Term]	101.747	11
False	High	IsMasterProtein	TRINITY_DN1178_c0_g1_i10.p1	type:5prime_partial gc:universal TRINITY_DN1178_c0_g1_i10:2167-50(-)	False	0	47.6287	16.8794	10	45	10	1	705	76.491	5.95	Not Found	Not Found	Not Found	Not Found	High	High	High	Not Found	Not Found	Not Found	High	High	Not Found	Not Found		97.3688	10
False	High	IsMasterProtein	TRINITY_DN9860_c0_g1_i3.p1	type:complete gc:universal TRINITY_DN9860_c0_g1_i3:3466-1589(-)	False	0	47.5706	18.88	10	45	10	1	625	70.938	8.1	Not Found	Not Found	High	High	High	High	High	High	Not Found	Not Found	High	High	Not Found	Not Found		96.8767	10
False	High	IsMasterProtein	TRINITY_DN156_c0_g1_i11.p1	type:5prime_partial gc:universal TRINITY_DN156_c0_g1_i11:2168-594(-)	False	0	47.2863	23.2824	12	44	7	1	524	59.725	7.36	Not Found	Not Found	High	High	High	High	High	High	Not Found	Not Found	High	High	Not Found	Not Found		103.529	12
False	High	IsMasterProtein	TRINITY_DN1041_c0_g1_i31.p1	type:complete gc:universal TRINITY_DN1041_c0_g1_i31:2102-528(-)	False	0	47.1302	18.1298	9	43	6	1	524	61.007	7.87	High	High	High	High	Not Found	Not Found	High	Not Found	Not Found	Not Found	High	High	Not Found	Not Found		102.485	9
False	High	IsMasterProtein	TRINITY_DN3132_c0_g1_i10.p1	type:complete gc:universal TRINITY_DN3132_c0_g1_i10:3045-1306(-)	False	0	46.9257	16.0622	7	43	7	1	579	62.889	6.25	Not Found	Not Found	High	High	High	High	High	High	Not Found	Not Found	High	High	Not Found	Not Found		95.2622	7
False	High	IsMasterProtein	TRINITY_DN4243_c2_g1_i2.p1	type:complete gc:universal TRINITY_DN4243_c2_g1_i2:1765-374(-)	False	0	46.9177	27.6458	9	43	4	1	463	50.381	9.09	Not Found	Not Found	High	High	High	High	Not Found	Not Found	Not Found	Not Found	High	High	Not Found	Not Found		135.994	9
False	High	IsMasterProtein	TRINITY_DN4275_c1_g1_i5.p1	type:3prime_partial gc:universal TRINITY_DN4275_c1_g1_i5:1039-2(-)	False	0	46.8099	28.3237	10	43	6	1	346	39.441	6.3	Not Found	Not Found	High	High	Not Found	Not Found	High	High	Not Found	Not Found	Not Found	Not Found	Not Found	Not Found		88.4244	10
False	High	IsMasterProtein	TRINITY_DN974_c0_g1_i6.p1	type:complete gc:universal TRINITY_DN974_c0_g1_i6:2800-1271(-)	False	0	46.7894	22.5933	11	43	10	1	509	57.948	4.94	High	High	High	High	High	High	High	High	High	High	High	High	High	High		153.325	11
False	High	IsMasterProtein	TRINITY_DN975_c0_g1_i3.p1	type:complete gc:universal TRINITY_DN975_c0_g1_i3:86-1333(+)	False	0	46.0409	31.3253	12	43	12	1	415	44.146	6.67	High	Not Found	Not Found	Not Found	High	High	Not Found	Not Found	Not Found	Not Found	High	High	Not Found	Not Found		64.7262	12
False	High	IsMasterProtein	TRINITY_DN395_c0_g1_i20.p1	type:complete gc:universal TRINITY_DN395_c0_g1_i20:1219-380(-)	False	0	45.5779	23.6559	8	43	8	1	279	30.472	5.99	High	High	High	High	High	High	High	High	High	High	High	High	High	High		243.55	8
False	High	IsMasterProtein	Cont_P08730	Keratin, type I cytoskeletal 13 OS=Mus musculus OX=10090 GN=Krt13 PE=1 SV=2	True	0	44.7763	15.103	10	42	2	1	437	47.724	4.86	High	High	Not Found	Not Found	Not Found	High	High	Not Found	High	High	Not Found	Not Found	High	High		309.631	10
False	High	IsMasterProtein	TRINITY_DN8348_c0_g1_i4.p1	type:complete gc:universal TRINITY_DN8348_c0_g1_i4:2654-237(-)	False	0	44.4701	14.2857	10	42	10	1	805	91.768	7.65	Not Found	Not Found	High	High	High	High	High	High	High	High	High	High	High	Not Found		98.7552	10
False	High	IsMasterProtein	TRINITY_DN2571_c0_g1_i10.p1	type:complete gc:universal TRINITY_DN2571_c0_g1_i10:46-1473(+)	False	0	44.4333	23.5789	10	42	10	1	475	52.897	6.02	Not Found	Not Found	High	High	High	Not Found	High	High	Not Found	Not Found	Not Found	Not Found	Not Found	Not Found		92.3093	10
False	High	IsMasterProtein	Cont_Q7Z3Z0	Keratin, type I cytoskeletal 25 OS=Homo sapiens OX=9606 GN=KRT25 PE=1 SV=1	True	0	44.2104	20.2222	10	42	3	1	450	49.287	5.08	High	High	Not Found	High	High	High	High	High	High	High	High	High	High	High		334.452	10
False	High	IsMasterProtein	TRINITY_DN3936_c0_g1_i10.p2	type:complete gc:universal TRINITY_DN3936_c0_g1_i10:6762-4894(-)	False	0	43.802	16.881	10	42	10	1	622	66.611	7.46	Not Found	Not Found	High	High	High	High	High	High	Not Found	High	High	High	Not Found	Not Found		103.258	10
False	High	IsMasterProtein	TRINITY_DN1873_c0_g1_i1.p1	type:complete gc:universal TRINITY_DN1873_c0_g1_i1:2932-440(-)	False	0	43.2399	11.6867	7	41	7	1	830	91.163	5.74	High	High	High	High	High	High	High	High	High	High	High	High	High	High		105.286	7
False	High	IsMasterProtein	TRINITY_DN1072_c0_g1_i1.p2	type:complete gc:universal TRINITY_DN1072_c0_g1_i1:147-1541(+)	False	0	43.202	22.8448	8	41	8	1	464	50.167	6.54	Not Found	Not Found	Not Found	Not Found	High	High	Not Found	Not Found	Not Found	Not Found	High	High	Not Found	Not Found		56.7168	8
False	High	IsMasterProtein	TRINITY_DN1846_c0_g1_i10.p1	type:complete gc:universal TRINITY_DN1846_c0_g1_i10:1814-72(-)	False	0	43.1473	15.8621	10	41	10	1	580	66.484	4.61	Not Found	Not Found	High	High	High	High	High	High	Not Found	Not Found	High	High	Not Found	Not Found		107.236	10
False	High	IsMasterProtein	TRINITY_DN7056_c0_g1_i1.p1	type:complete gc:universal TRINITY_DN7056_c0_g1_i1:92-5227(+)	False	0	42.8045	11.4553	16	41	16	1	1711	183.85	5.9	High	High	Not Found	Not Found	Not Found	Not Found	Not Found	Not Found	High	High	High	Not Found	High	High		76.7071	16
False	High	IsMasterProtein	TRINITY_DN2557_c0_g1_i2.p1	type:complete gc:universal TRINITY_DN2557_c0_g1_i2:2005-122(-)	False	0	42.5305	17.5439	10	41	10	1	627	70.277	6.6	Not Found	Not Found	High	High	High	Not Found	High	High	Not Found	Not Found	High	High	Not Found	Not Found		68.9969	10
False	High	IsMasterProtein	TRINITY_DN1544_c0_g1_i9.p1	type:complete gc:universal TRINITY_DN1544_c0_g1_i9:1418-225(-)	False	0	42.3028	27.9597	10	41	10	1	397	44.503	6.47	High	High	High	High	High	High	High	High	High	High	High	High	High	High		114.968	10
False	High	IsMasterProtein	TRINITY_DN9544_c0_g1_i2.p1	type:complete gc:universal TRINITY_DN9544_c0_g1_i2:114-2801(+)	False	0	42.0053	17.6536	13	41	13	1	895	99.626	8.19	Not Found	Not Found	High	High	High	High	High	High	Not Found	Not Found	High	High	Not Found	Not Found		99.2084	13
False	High	IsMasterProtein	TRINITY_DN1943_c0_g2_i1.p1	type:complete gc:universal TRINITY_DN1943_c0_g2_i1:2492-1116(-)	False	0	41.8692	20.3057	7	41	7	1	458	52.484	8.18	Not Found	Not Found	High	High	High	High	High	High	Not Found	Not Found	High	High	Not Found	Not Found		113.52	7
False	High	IsMasterProtein	TRINITY_DN4074_c0_g1_i2.p1	type:complete gc:universal TRINITY_DN4074_c0_g1_i2:3210-1279(-)	False	0	41.6733	15.2411	8	41	8	1	643	71.109	8.59	High	Not Found	High	High	High	High	High	High	Not Found	High	High	High	Not Found	Not Found		101.562	8
False	High	IsMasterProtein	TRINITY_DN7317_c0_g1_i1.p1	type:complete gc:universal TRINITY_DN7317_c0_g1_i1:3837-1504(-)	False	0	41.4561	14.157	11	40	11	1	777	89.554	8.73	High	High	High	High	High	High	High	High	High	High	High	Not Found	High	High		109.095	11
False	High	IsMasterProtein	TRINITY_DN6000_c0_g1_i1.p1	type:complete gc:universal TRINITY_DN6000_c0_g1_i1:151-1572(+)	False	0	41.4112	29.3869	12	40	12	1	473	50.998	9.11	Not Found	Not Found	Not Found	Not Found	High	High	Not Found	Not Found	Not Found	Not Found	High	High	Not Found	Not Found		75.8841	12
False	High	IsMasterProtein	TRINITY_DN2756_c0_g2_i2.p1	type:5prime_partial gc:universal TRINITY_DN2756_c0_g2_i2:1972-332(-)	False	0	41.3346	19.9634	11	40	11	1	546	62.653	8.88	Not Found	Not Found	High	High	High	High	High	High	High	Not Found	High	High	Not Found	Not Found		110.215	11
False	High	IsMasterProtein	TRINITY_DN1564_c0_g1_i1.p1	type:complete gc:universal TRINITY_DN1564_c0_g1_i1:1547-126(-)	False	0	40.7315	20.296	7	40	7	1	473	52.348	4.67	Not Found	Not Found	High	High	Not Found	Not Found	High	High	Not Found	Not Found	Not Found	Not Found	Not Found	Not Found		58.8319	7
False	High	IsMasterProtein	TRINITY_DN4639_c0_g1_i17.p1	type:complete gc:universal TRINITY_DN4639_c0_g1_i17:40-1290(+)	False	0	40.2081	21.1538	8	40	8	1	416	48.201	8.46	High	High	High	High	High	High	High	High	High	High	High	High	High	High		144.405	8
False	High	IsMasterProtein	TRINITY_DN227_c2_g1_i1.p1	type:complete gc:universal TRINITY_DN227_c2_g1_i1:209-1426(+)	False	0	40.1584	28.3951	9	40	9	1	405	45.39	4.87	High	High	High	High	High	High	High	High	High	High	High	High	High	High		121.823	9
False	High	IsMasterProtein	TRINITY_DN795_c0_g1_i6.p1	type:complete gc:universal TRINITY_DN795_c0_g1_i6:71-1744(+)	False	0	40.064	16.5171	6	40	2	1	557	62.531	5.31	Not Found	Not Found	Not Found	High	Not Found	Not Found	Not Found	Not Found	Not Found	Not Found	High	High	Not Found	Not Found		57.1665	6
False	High	IsMasterProtein	TRINITY_DN1869_c0_g1_i4.p1	type:complete gc:universal TRINITY_DN1869_c0_g1_i4:215-4120(+)	False	0	40.0451	12.6826	11	40	11	1	1301	142.957	6.96	High	High	High	Not Found	High	High	High	High	High	High	High	High	High	High		90.9506	11
False	High	IsMasterProtein	Cont_Q6KB66	Keratin, type II cytoskeletal 80 OS=Homo sapiens OX=9606 GN=KRT80 PE=1 SV=2	True	0	39.739	32.9646	14	40	13	1	452	50.494	5.67	High	High	High	High	High	Not Found	High	High	High	High	High	High	High	High		86.7858	14
False	High	IsMasterProtein	TRINITY_DN344_c0_g3_i2.p1	type:complete gc:universal TRINITY_DN344_c0_g3_i2:3240-1183(-)	False	0	39.6261	16.3504	10	40	10	1	685	74.558	6.27	Not Found	Not Found	High	High	High	High	High	High	Not Found	Not Found	High	High	Not Found	Not Found		84.7645	10
False	High	IsMasterProtein	TRINITY_DN4534_c0_g1_i3.p1	type:complete gc:universal TRINITY_DN4534_c0_g1_i3:2716-935(-)	False	0	39.4055	17.2007	8	39	8	1	593	64.103	8.35	Not Found	Not Found	High	High	Not Found	High	High	High	Not Found	Not Found	High	High	Not Found	Not Found		82.4608	8
False	High	IsMasterProtein	Cont_Q7RTS7	Keratin, type II cytoskeletal 74 OS=Homo sapiens OX=9606 GN=KRT74 PE=1 SV=2	True	0	39.1507	15.3119	12	39	1	1	529	57.83	7.71	High	High	Not Found	High	Not Found	Not Found	High	High	High	High	Not Found	Not Found	High	High		263.547	12
False	High	IsMasterProtein	TRINITY_DN3974_c0_g1_i2.p1	type:complete gc:universal TRINITY_DN3974_c0_g1_i2:234-1700(+)	False	0	38.7271	11.8852	5	39	5	1	488	52.638	5.78	High	High	High	High	High	High	High	High	High	High	High	High	High	High		208.86	5
False	High	IsMasterProtein	Cont_P12763	Alpha-2-HS-glycoprotein OS=Bos taurus OX=9913 GN=AHSG PE=1 SV=2	True	0	38.1104	12.5348	2	39	2	1	359	38.394	5.5	High	High	High	High	High	High	High	High	High	High	High	High	High	High		1164.48	2
False	High	IsMasterProtein	TRINITY_DN3831_c0_g1_i1.p1	type:complete gc:universal TRINITY_DN3831_c0_g1_i1:3176-390(-)	False	0	37.9606	13.5776	11	39	11	1	928	105.449	4.81	High	High	Not Found	Not Found	Not Found	High	Not Found	Not Found	High	High	Not Found	Not Found	High	High		94.2947	11
False	High	IsMasterProtein	TRINITY_DN2022_c0_g1_i12.p1	type:internal gc:universal TRINITY_DN2022_c0_g1_i12:1-3783(+)	False	0	37.5913	8.64393	8	39	6	1	1261	145.596	4.37	Not Found	Not Found	High	High	High	High	Not Found	Not Found	Not Found	Not Found	High	High	Not Found	Not Found		47.2617	8
False	High	IsMasterProtein	TRINITY_DN12687_c0_g1_i3.p1	type:5prime_partial gc:universal TRINITY_DN12687_c0_g1_i3:1-501(+)	False	0	37.5015	51.8072	7	39	5	1	166	19.15	5.63	Not Found	Not Found	High	High	Not Found	Not Found	High	High	High	High	High	High	Not Found	Not Found		139.332	7
False	High	IsMasterProtein	TRINITY_DN4275_c0_g1_i14.p1	type:complete gc:universal TRINITY_DN4275_c0_g1_i14:1609-29(-)	False	0	37.2638	18.251	10	39	8	1	526	59.721	8.69	Not Found	Not Found	High	High	High	High	High	High	Not Found	Not Found	High	High	Not Found	Not Found		128.336	10
False	High	IsMasterProtein	TRINITY_DN1208_c0_g1_i6.p1	type:complete gc:universal TRINITY_DN1208_c0_g1_i6:5367-181(-)	False	0	37.1901	8.21759	10	38	10	1	1728	193.927	4.4	High	High	Not Found	High	Not Found	Not Found	High	High	High	High	High	High	High	High		54.476	10
False	High	IsMasterProtein	TRINITY_DN1554_c0_g1_i1.p1	type:complete gc:universal TRINITY_DN1554_c0_g1_i1:2314-1217(-)	False	0	37.0967	20.274	8	38	8	1	365	41.555	7.62	Not Found	Not Found	High	High	High	High	High	High	Not Found	Not Found	High	High	Not Found	Not Found		85.7112	8
False	High	IsMasterProtein	TRINITY_DN1585_c0_g2_i10.p1	type:5prime_partial gc:universal TRINITY_DN1585_c0_g2_i10:1506-31(-)	False	0	36.8694	21.1813	9	38	2	1	491	55.873	5.06	Not Found	Not Found	High	High	Not Found	Not Found	Not Found	Not Found	Not Found	Not Found	Not Found	Not Found	Not Found	Not Found		74.1405	9
False	High	IsMasterProtein	TRINITY_DN2515_c0_g1_i12.p1	type:complete gc:universal TRINITY_DN2515_c0_g1_i12:3177-922(-)	False	0	36.86	17.1771	10	38	10	1	751	83.803	4.6	Not Found	Not Found	Not Found	Not Found	High	High	Not Found	Not Found	Not Found	Not Found	High	High	Not Found	Not Found		55.7837	10
False	High	IsMasterProtein	Cont_Q7Z3Y7	Keratin, type I cytoskeletal 28 OS=Homo sapiens OX=9606 GN=KRT28 PE=1 SV=2	True	0	36.6378	14.2241	8	38	2	1	464	50.536	5.47	High	High	Not Found	Not Found	Not Found	Not Found	Not Found	Not Found	Not Found	Not Found	Not Found	Not Found	High	Not Found		344.283	8
False	High	IsMasterProtein	TRINITY_DN996_c0_g1_i8.p1	type:5prime_partial gc:universal TRINITY_DN996_c0_g1_i8:806-141(-)	False	0	36.3996	22.6244	5	38	3	1	221	24.972	9.72	Not Found	Not Found	High	High	High	High	High	High	Not Found	Not Found	High	High	High	Not Found		165.595	5
False	High	IsMasterProtein	TRINITY_DN5542_c0_g1_i4.p1	type:complete gc:universal TRINITY_DN5542_c0_g1_i4:71-1615(+)	False	0	36.2772	21.4008	9	38	5	1	514	58.584	8.16	Not Found	Not Found	High	High	Not Found	Not Found	High	High	Not Found	Not Found	Not Found	Not Found	Not Found	Not Found		58.9351	9
False	High	IsMasterProtein	TRINITY_DN5770_c0_g1_i6.p1	type:complete gc:universal TRINITY_DN5770_c0_g1_i6:383-1666(+)	False	0	36.1683	16.6276	6	38	6	1	427	46.154	5.15	Not Found	Not Found	High	High	High	High	High	High	Not Found	Not Found	High	High	Not Found	Not Found		90.7273	6
False	High	IsMasterProtein	Cont_P78385	Keratin, type II cuticular Hb3 OS=Homo sapiens OX=9606 GN=KRT83 PE=1 SV=2	True	0	36.1294	20.0811	9	37	2	1	493	54.161	5.64	Not Found	Not Found	Not Found	Not Found	Not Found	Not Found	Not Found	High	High	Not Found	Not Found	Not Found	Not Found	Not Found		42.8875	9
False	High	IsMasterProtein	TRINITY_DN194_c0_g1_i57.p1	type:complete gc:universal TRINITY_DN194_c0_g1_i57:13461-964(-)	False	0	35.9463	2.71309	9	37	9	1	4165	457.689	4.82	High	High	Not Found	Not Found	Not Found	Not Found	Not Found	Not Found	High	High	Not Found	Not Found	High	High		43.2318	9
False	High	IsMasterProtein	TRINITY_DN8285_c0_g1_i6.p1	type:complete gc:universal TRINITY_DN8285_c0_g1_i6:1971-589(-)	False	0	35.875	26.5217	12	37	12	1	460	52.165	6.44	High	Not Found	High	High	High	High	High	High	High	High	High	High	High	Not Found		78.5279	12
False	High	IsMasterProtein	Cont_Q15323	Keratin, type I cuticular Ha1 OS=Homo sapiens OX=9606 GN=KRT31 PE=1 SV=3	True	0	35.7942	24.5192	10	37	1	1	416	47.207	4.88	Not Found	Not Found	Not Found	Not Found	Not Found	Not Found	Not Found	Not Found	High	High	Not Found	Not Found	Not Found	Not Found		128.738	10
False	High	IsMasterProtein	TRINITY_DN1505_c0_g1_i7.p1	type:complete gc:universal TRINITY_DN1505_c0_g1_i7:123-2279(+)	False	0	35.4998	15.3203	10	37	9	1	718	79.893	4.89	Not Found	Not Found	High	High	High	High	High	High	Not Found	Not Found	Not Found	Not Found	Not Found	Not Found		45.5709	10
False	High	IsMasterProtein	Cont_P78386	Keratin, type II cuticular Hb5 OS=Homo sapiens OX=9606 GN=KRT85 PE=1 SV=1	True	0	35.4416	17.357	9	37	2	1	507	55.766	6.55	High	High	High	High	Not Found	Not Found	High	High	High	High	High	Not Found	High	Not Found		64.4548	9
False	High	IsMasterProtein	TRINITY_DN6965_c0_g1_i1.p1	type:complete gc:universal TRINITY_DN6965_c0_g1_i1:2860-1529(-)	False	0	35.0432	22.1219	9	36	9	1	443	48.337	5.38	Not Found	Not Found	High	High	High	High	High	High	Not Found	Not Found	High	High	Not Found	Not Found		87.3778	9
False	High	IsMasterProtein	TRINITY_DN133_c0_g1_i2.p1	type:complete gc:universal TRINITY_DN133_c0_g1_i2:2294-723(-)	False	0	34.8239	16.4436	8	36	7	1	523	57.655	8.02	Not Found	Not Found	Not Found	Not Found	High	High	Not Found	Not Found	Not Found	Not Found	High	High	Not Found	Not Found		48.337	8
False	High	IsMasterProtein	TRINITY_DN4528_c0_g1_i5.p1	type:5prime_partial gc:universal TRINITY_DN4528_c0_g1_i5:1664-90(-)	False	0	34.3903	16.0305	8	36	5	1	524	60.59	5.11	Not Found	Not Found	High	High	Not Found	Not Found	Not Found	Not Found	Not Found	Not Found	Not Found	Not Found	Not Found	Not Found		41.5821	8
False	High	IsMasterProtein	TRINITY_DN1037_c0_g1_i1.p1	type:complete gc:universal TRINITY_DN1037_c0_g1_i1:1830-700(-)	False	0	34.3042	20.2128	6	36	6	1	376	44.656	6.93	High	High	High	High	High	High	High	High	High	High	High	High	High	High		83.3577	6
False	High	IsMasterProtein	TRINITY_DN1626_c1_g2_i3.p1	type:complete gc:universal TRINITY_DN1626_c1_g2_i3:66-3557(+)	False	0	34.2891	12.8977	13	35	13	1	1163	129.376	5.07	High	High	Not Found	Not Found	Not Found	Not Found	Not Found	High	High	High	Not Found	Not Found	Not Found	High		67.1057	13
False	High	IsMasterProtein	TRINITY_DN5129_c0_g1_i2.p1	type:complete gc:universal TRINITY_DN5129_c0_g1_i2:129-1460(+)	False	0	34.172	22.7991	10	35	10	1	443	48.654	6.47	Not Found	Not Found	Not Found	Not Found	High	High	High	Not Found	Not Found	Not Found	High	High	Not Found	Not Found		56.9251	10
False	High	IsMasterProtein	TRINITY_DN751_c0_g1_i2.p1	type:3prime_partial gc:universal TRINITY_DN751_c0_g1_i2:18-1391(+)	False	0	33.7586	14.8472	7	35	6	1	458	51.639	6.61	Not Found	Not Found	High	High	Not Found	Not Found	High	High	Not Found	Not Found	Not Found	Not Found	Not Found	Not Found		59.4152	7
False	High	IsMasterProtein	TRINITY_DN5592_c0_g1_i1.p1	type:complete gc:universal TRINITY_DN5592_c0_g1_i1:1758-856(-)	False	0	33.6168	35.3333	12	35	12	1	300	32.762	9.83	High	High	High	High	High	High	High	High	High	High	High	High	High	High		142.911	12
False	High	IsMasterProtein	TRINITY_DN5469_c0_g1_i5.p1	type:complete gc:universal TRINITY_DN5469_c0_g1_i5:88-1887(+)	False	0	33.5511	22.8715	12	35	12	1	599	67.936	8.59	Not Found	Not Found	High	High	High	High	High	High	Not Found	High	High	High	Not Found	Not Found		58.8096	12
False	High	IsMasterProtein	Cont_Q14CN4	Keratin, type II cytoskeletal 72 OS=Homo sapiens OX=9606 GN=KRT72 PE=1 SV=2	True	0	33.3584	16.8297	11	34	4	1	511	55.842	6.89	High	High	High	High	Not Found	Not Found	High	High	High	High	High	High	High	Not Found		218.163	11
False	High	IsMasterProtein	TRINITY_DN8439_c0_g1_i11.p5	type:complete gc:universal TRINITY_DN8439_c0_g1_i11:698-288(-)	False	0	33.2728	47.7941	5	34	5	1	136	15.379	11.27	High	High	High	Not Found	High	High	High	High	High	High	High	High	Not Found	High		72.3639	5
False	High	IsMasterProtein	TRINITY_DN1398_c1_g1_i1.p1	type:complete gc:universal TRINITY_DN1398_c1_g1_i1:786-2378(+)	False	0	33.1079	21.5094	10	34	8	1	530	61.409	7.12	Not Found	Not Found	High	High	Not Found	Not Found	High	High	Not Found	Not Found	High	Not Found	Not Found	Not Found		57.8301	10
False	High	IsMasterProtein	TRINITY_DN380_c0_g1_i1.p1	type:complete gc:universal TRINITY_DN380_c0_g1_i1:1711-1235(-)	False	0	33.0564	11.3924	1	34	1	1	158	16.1	9	High	High	High	High	High	High	High	High	High	High	High	High	High	High		111.126	1
False	High	IsMasterProtein	TRINITY_DN2548_c0_g1_i5.p1	type:complete gc:universal TRINITY_DN2548_c0_g1_i5:134-1726(+)	False	0	33.0224	13.9623	7	34	7	1	530	59.571	5.62	Not Found	Not Found	High	High	High	High	High	High	Not Found	Not Found	High	Not Found	Not Found	Not Found		55.3691	7
False	High	IsMasterProtein	TRINITY_DN1072_c0_g1_i1.p1	type:5prime_partial gc:universal TRINITY_DN1072_c0_g1_i1:5044-2453(-)	False	0	32.8602	12.7462	9	33	9	1	863	97.025	4.73	Not Found	Not Found	High	High	High	Not Found	High	High	Not Found	Not Found	High	High	Not Found	Not Found		48.317	9
False	High	IsMasterProtein	TRINITY_DN302_c1_g1_i11.p1	type:complete gc:universal TRINITY_DN302_c1_g1_i11:4016-1278(-)	False	0	32.7655	9.42982	8	33	8	1	912	100.58	6.86	High	High	High	High	High	High	High	High	High	High	High	High	High	High		127.277	8
False	High	IsMasterProtein	TRINITY_DN1042_c1_g1_i5.p1	type:complete gc:universal TRINITY_DN1042_c1_g1_i5:4055-273(-)	False	0	32.2215	9.60317	9	33	9	1	1260	139.314	6.01	High	Not Found	Not Found	Not Found	Not Found	Not Found	Not Found	Not Found	High	High	Not Found	Not Found	Not Found	High		35.4436	9
False	High	IsMasterProtein	Cont_P34955	Alpha-1-antiproteinase OS=Bos taurus OX=9913 GN=SERPINA1 PE=1 SV=1	True	0	32.0117	10.0962	3	33	3	1	416	46.075	6.52	High	High	High	High	High	High	High	High	Not Found	Not Found	High	High	High	High		74.8935	3
False	High	IsMasterProtein	TRINITY_DN4266_c0_g1_i3.p1	type:5prime_partial gc:universal TRINITY_DN4266_c0_g1_i3:1106-72(-)	False	0	31.9731	25.5814	9	33	9	1	344	36.855	9.98	High	High	High	Not Found	High	High	Not Found	Not Found	High	Not Found	High	High	Not Found	Not Found		67.8557	9
False	High	IsMasterProtein	TRINITY_DN5691_c0_g1_i2.p1	type:complete gc:universal TRINITY_DN5691_c0_g1_i2:1615-134(-)	False	0	31.5379	21.501	10	33	10	1	493	55.473	5.81	Not Found	Not Found	Not Found	Not Found	High	High	Not Found	Not Found	Not Found	Not Found	High	High	Not Found	Not Found		42.9674	10
False	High	IsMasterProtein	TRINITY_DN154_c0_g1_i3.p1	type:complete gc:universal TRINITY_DN154_c0_g1_i3:194-2707(+)	False	0	31.4343	12.9032	11	32	11	1	837	93.931	5.97	Not Found	Not Found	High	High	High	High	High	High	Not Found	Not Found	High	High	Not Found	Not Found		80.8021	11
False	High	IsMasterProtein	TRINITY_DN12427_c0_g1_i1.p1	type:complete gc:universal TRINITY_DN12427_c0_g1_i1:122-1774(+)	False	0	31.3887	18	9	32	9	1	550	60.366	6.34	High	High	High	High	High	High	High	High	High	High	High	High	Not Found	High		107.388	9
False	High	IsMasterProtein	TRINITY_DN8338_c0_g1_i26.p1	type:complete gc:universal TRINITY_DN8338_c0_g1_i26:1743-349(-)	False	0	31.3577	19.6121	7	32	7	1	464	51.904	5.94	Not Found	Not Found	High	High	High	Not Found	High	High	Not Found	Not Found	High	High	Not Found	Not Found		70.891	7
False	High	IsMasterProtein	Cont_P02534	Keratin, type I microfibrillar 48 kDa, component 8C-1 OS=Ovis aries OX=9940 PE=1 SV=2	True	0	31.2817	22.0874	9	32	1	1	412	46.645	4.81	Not Found	Not Found	Not Found	Not Found	Not Found	Not Found	Not Found	Not Found	High	Not Found	Not Found	Not Found	Not Found	High		120.403	9
False	High	IsMasterProtein	TRINITY_DN10518_c0_g1_i1.p1	type:internal gc:universal TRINITY_DN10518_c0_g1_i1:1602-1(-)	False	0	31.219	19.6629	8	31	8	1	534	59.364	6.48	Not Found	Not Found	High	High	Not Found	Not Found	High	High	Not Found	Not Found	Not Found	Not Found	Not Found	Not Found		50.5967	8
False	High	IsMasterProtein	Cont_Q01546	Keratin, type II cytoskeletal 2 oral OS=Homo sapiens OX=9606 GN=KRT76 PE=1 SV=2	True	0	31.1809	9.87461	10	31	1	1	638	65.8	8.12	Not Found	Not Found	Not Found	Not Found	Not Found	Not Found	Not Found	Not Found	Not Found	High	Not Found	Not Found	Not Found	High		122.829	10
False	High	IsMasterProtein	TRINITY_DN1585_c0_g1_i3.p1	type:3prime_partial gc:universal TRINITY_DN1585_c0_g1_i3:595-2(-)	False	0	31.116	38.8889	7	30	3	1	198	22.513	4.6	Not Found	Not Found	High	High	High	High	High	High	High	Not Found	Not Found	Not Found	Not Found	Not Found		212.432	7
False	High	IsMasterProtein	TRINITY_DN4263_c0_g1_i1.p1	type:complete gc:universal TRINITY_DN4263_c0_g1_i1:2228-288(-)	False	0	30.8498	19.3498	10	30	10	1	646	73.344	6.8	Not Found	Not Found	High	High	Not Found	Not Found	High	High	High	Not Found	High	Not Found	High	Not Found		57.9238	10
False	High	IsMasterProtein	TRINITY_DN459_c0_g1_i12.p2	type:complete gc:universal TRINITY_DN459_c0_g1_i12:1779-754(-)	False	0	30.7723	19.6481	7	30	7	1	341	37.973	6.74	Not Found	Not Found	High	High	High	High	High	High	Not Found	Not Found	High	High	Not Found	Not Found		65.6538	7
False	High	IsMasterProtein	Cont_P68138	Actin, alpha skeletal muscle OS=Bos taurus OX=9913 GN=ACTA1 PE=1 SV=1	True	0	30.6532	22.8117	7	30	1	1	377	42.024	5.39	High	High	Not Found	High	High	Not Found	Not Found	Not Found	Not Found	Not Found	Not Found	Not Found	Not Found	High		107.804	7
False	High	IsMasterProtein	TRINITY_DN3792_c0_g1_i1.p1	type:complete gc:universal TRINITY_DN3792_c0_g1_i1:1287-64(-)	False	0	30.6487	29.484	9	30	9	1	407	44.451	7.83	Not Found	Not Found	Not Found	Not Found	Not Found	High	Not Found	Not Found	Not Found	Not Found	High	High	Not Found	Not Found		30.971	9
False	High	IsMasterProtein	TRINITY_DN216_c0_g1_i45.p2	type:complete gc:universal TRINITY_DN216_c0_g1_i45:954-2891(+)	False	0	30.4057	10.5426	6	30	5	1	645	72.649	6.89	High	High	High	High	High	High	High	High	High	High	High	High	High	High		71.8013	6
False	High	IsMasterProtein	TRINITY_DN5435_c0_g1_i2.p1	type:complete gc:universal TRINITY_DN5435_c0_g1_i2:233-9334(+)	False	0	30.3109	3.23112	9	29	9	1	3033	342.918	6.38	High	High	High	Not Found	Not Found	Not Found	High	High	High	High	Not Found	Not Found	High	High		43.832	9
False	High	IsMasterProtein	TRINITY_DN894_c1_g3_i1.p1	type:complete gc:universal TRINITY_DN894_c1_g3_i1:1251-439(-)	False	0	30.2622	22.2222	5	29	5	1	270	30.485	8.65	High	High	High	High	High	Not Found	High	High	High	High	High	High	High	High	Acetyl [N-Term]	73.2935	5
False	High	IsMasterProtein	TRINITY_DN4686_c0_g1_i2.p1	type:5prime_partial gc:universal TRINITY_DN4686_c0_g1_i2:1920-181(-)	False	0	29.7646	12.2625	5	29	5	1	579	65.449	5.36	Not Found	Not Found	High	High	High	Not Found	Not Found	Not Found	Not Found	Not Found	High	High	Not Found	Not Found		44.1882	5
False	High	IsMasterProtein	TRINITY_DN219_c0_g1_i10.p1	type:complete gc:universal TRINITY_DN219_c0_g1_i10:191-2935(+)	False	0	29.7159	8.53392	7	29	7	1	914	103.209	4.16	Not Found	High	High	High	High	High	High	High	Not Found	Not Found	High	High	Not Found	Not Found		45.5961	7
False	High	IsMasterProtein	TRINITY_DN696_c2_g1_i8.p1	type:3prime_partial gc:universal TRINITY_DN696_c2_g1_i8:295-2328(+)	False	0	29.7016	14.3068	9	29	9	1	678	75.586	8.51	Not Found	Not Found	High	High	High	High	High	High	Not Found	Not Found	Not Found	High	Not Found	Not Found		52.4382	9
False	High	IsMasterProtein	TRINITY_DN91_c0_g1_i25.p1	type:3prime_partial gc:universal TRINITY_DN91_c0_g1_i25:178-3144(+)	False	0	29.4756	7.58342	6	29	6	1	989	111.447	7.37	Not Found	Not Found	High	High	High	High	High	High	High	High	High	High	Not Found	Not Found		51.9754	6
False	High	IsMasterProtein	TRINITY_DN7196_c0_g1_i10.p1	type:complete gc:universal TRINITY_DN7196_c0_g1_i10:186-1502(+)	False	0	29.3673	17.3516	7	29	7	1	438	50.505	6.35	Not Found	Not Found	High	High	Not Found	High	High	High	Not Found	Not Found	Not Found	Not Found	Not Found	Not Found		74.0004	7
False	High	IsMasterProtein	TRINITY_DN1496_c0_g1_i2.p1	type:complete gc:universal TRINITY_DN1496_c0_g1_i2:2909-744(-)	False	0	29.284	10.8183	6	29	6	1	721	80.214	7.99	Not Found	Not Found	High	High	High	High	High	High	Not Found	Not Found	High	High	Not Found	Not Found		46.8225	6
False	High	IsMasterProtein	TRINITY_DN60_c0_g1_i11.p1	type:complete gc:universal TRINITY_DN60_c0_g1_i11:134-3103(+)	False	0	29.1723	9.909	8	29	8	1	989	111.651	9.48	Not Found	Not Found	High	High	High	High	High	High	Not Found	Not Found	High	High	Not Found	Not Found		71.309	8
False	High	IsMasterProtein	TRINITY_DN729_c0_g1_i2.p1	type:complete gc:universal TRINITY_DN729_c0_g1_i2:2720-1332(-)	False	0	29.0202	13.6364	6	28	3	1	462	51.837	4.97	Not Found	Not Found	High	High	Not Found	Not Found	High	High	Not Found	Not Found	High	High	Not Found	Not Found		58.7364	6
False	High	IsMasterProtein	TRINITY_DN4819_c0_g1_i11.p1	type:complete gc:universal TRINITY_DN4819_c0_g1_i11:4592-2259(-)	False	0	29.0163	10.4247	7	28	6	1	777	87.102	8.91	High	High	High	High	High	High	High	High	High	High	High	High	High	High		76.2458	7
False	High	IsMasterProtein	TRINITY_DN816_c0_g1_i4.p1	type:5prime_partial gc:universal TRINITY_DN816_c0_g1_i4:3-1658(+)	False	0	28.9934	14.882	7	28	6	1	551	62.303	5.17	High	High	High	High	High	High	High	High	High	High	High	High	Not Found	Not Found		65.8583	7
False	High	IsMasterProtein	TRINITY_DN12451_c0_g1_i9.p1	type:complete gc:universal TRINITY_DN12451_c0_g1_i9:188-2626(+)	False	0	28.8882	8.99015	6	28	6	1	812	89.498	5.03	High	High	Not Found	Not Found	Not Found	High	Not Found	High	High	High	Not Found	Not Found	Not Found	High		32.9393	6
False	High	IsMasterProtein	TRINITY_DN7729_c0_g1_i3.p1	type:complete gc:universal TRINITY_DN7729_c0_g1_i3:2805-1447(-)	False	0	28.7896	20.7965	7	28	7	1	452	49.784	4.97	Not Found	Not Found	High	High	High	High	High	High	High	Not Found	High	High	Not Found	Not Found		93.6867	7
False	High	IsMasterProtein	TRINITY_DN8343_c0_g1_i6.p1	type:3prime_partial gc:universal TRINITY_DN8343_c0_g1_i6:3253-2(-)	False	0	28.6548	9.87085	8	27	8	1	1084	125.434	5.58	High	High	Not Found	Not Found	Not Found	Not Found	Not Found	High	High	High	Not Found	Not Found	High	High		30.073	8
False	High	IsMasterProtein	TRINITY_DN2560_c1_g1_i1.p1	type:complete gc:universal TRINITY_DN2560_c1_g1_i1:2414-981(-)	False	0	28.5745	19.2872	9	27	9	1	477	55.244	6.96	Not Found	Not Found	Not Found	Not Found	High	High	Not Found	Not Found	Not Found	Not Found	High	High	Not Found	Not Found		34.1368	9
False	High	IsMasterProtein	TRINITY_DN795_c1_g1_i1.p1	type:5prime_partial gc:universal TRINITY_DN795_c1_g1_i1:2-1075(+)	False	0	28.5489	28.5714	9	27	9	1	357	39.86	5.5	Not Found	Not Found	High	High	High	High	High	High	Not Found	High	High	High	High	Not Found		112.918	9
False	High	IsMasterProtein	TRINITY_DN1445_c0_g1_i22.p1	type:complete gc:universal TRINITY_DN1445_c0_g1_i22:3910-644(-)	False	0	28.4531	7.99632	9	27	9	1	1088	120.804	6.44	High	High	High	High	High	High	High	Not Found	High	High	Not Found	Not Found	High	High		73.6118	9
False	High	IsMasterProtein	TRINITY_DN2096_c0_g1_i4.p1	type:complete gc:universal TRINITY_DN2096_c0_g1_i4:2071-563(-)	False	0	28.357	15.1394	7	27	7	1	502	58.597	8.43	Not Found	Not Found	High	High	Not Found	Not Found	High	High	Not Found	Not Found	High	Not Found	Not Found	Not Found		41.3605	7
False	High	IsMasterProtein	TRINITY_DN4732_c0_g1_i1.p1	type:3prime_partial gc:universal TRINITY_DN4732_c0_g1_i1:1066-2(-)	False	0	28.1391	18.5915	8	26	4	1	355	40.289	7.18	Not Found	Not Found	High	High	Not Found	Not Found	High	High	Not Found	Not Found	High	High	Not Found	Not Found		55.4612	8
False	High	IsMasterProtein	TRINITY_DN428_c0_g1_i8.p1	type:complete gc:universal TRINITY_DN428_c0_g1_i8:4586-555(-)	False	0	27.9628	6.25465	8	26	6	1	1343	150.423	7.68	High	High	High	High	High	High	High	High	High	High	High	High	High	High		77.6572	8
False	High	IsMasterProtein	TRINITY_DN3458_c0_g1_i1.p1	type:complete gc:universal TRINITY_DN3458_c0_g1_i1:69-1721(+)	False	0	27.9435	11.0909	5	26	5	1	550	64.289	7.75	Not Found	Not Found	High	High	Not Found	Not Found	High	High	Not Found	Not Found	High	High	Not Found	Not Found		41.9055	5
False	High	IsMasterProtein	TRINITY_DN5626_c0_g1_i5.p1	type:complete gc:universal TRINITY_DN5626_c0_g1_i5:2254-818(-)	False	0	27.7925	15.272	6	26	6	1	478	54.193	5.76	Not Found	Not Found	High	High	Not Found	High	High	High	Not Found	Not Found	High	High	Not Found	Not Found		44.9854	6
False	High	IsMasterProtein	TRINITY_DN2685_c0_g1_i5.p1	type:complete gc:universal TRINITY_DN2685_c0_g1_i5:4186-2285(-)	False	0	27.7903	12.4803	7	26	7	1	633	73.047	5.81	High	High	Not Found	High	Not Found	Not Found	High	High	High	High	Not Found	Not Found	High	High		37.82	7
False	High	IsMasterProtein	TRINITY_DN7777_c0_g1_i3.p1	type:complete gc:universal TRINITY_DN7777_c0_g1_i3:1854-244(-)	False	0	27.6748	12.5	5	26	5	1	536	57.406	7.83	Not Found	Not Found	High	High	High	High	Not Found	Not Found	High	High	High	High	Not Found	Not Found		56.7498	5
False	High	IsMasterProtein	TRINITY_DN7029_c0_g1_i1.p1	type:complete gc:universal TRINITY_DN7029_c0_g1_i1:178-2247(+)	False	0	27.3956	15.3846	6	26	6	1	689	77.829	7.53	Not Found	Not Found	High	High	Not Found	Not Found	High	High	Not Found	Not Found	High	High	Not Found	Not Found		54.0903	6
False	High	IsMasterProtein	TRINITY_DN1146_c0_g1_i1.p1	type:complete gc:universal TRINITY_DN1146_c0_g1_i1:3193-182(-)	False	0	27.3907	7.97607	8	26	8	1	1003	110.331	5.45	Not Found	Not Found	High	High	Not Found	High	High	High	Not Found	Not Found	High	Not Found	Not Found	Not Found		53.1278	8
False	High	IsMasterProtein	TRINITY_DN2131_c0_g1_i15.p1	type:complete gc:universal TRINITY_DN2131_c0_g1_i15:1401-61(-)	False	0	27.3907	19.2825	9	26	9	1	446	49.916	5.77	Not Found	Not Found	Not Found	Not Found	High	High	Not Found	Not Found	Not Found	Not Found	High	High	Not Found	Not Found		50.2367	9
False	High	IsMasterProtein	TRINITY_DN702_c0_g1_i5.p1	type:complete gc:universal TRINITY_DN702_c0_g1_i5:1728-133(-)	False	0	27.3353	16.5725	7	26	6	1	531	58.612	5.29	Not Found	Not Found	High	High	High	High	High	High	Not Found	Not Found	High	High	Not Found	Not Found		36.82	7
False	High	IsMasterProtein	TRINITY_DN272_c0_g1_i3.p1	type:5prime_partial gc:universal TRINITY_DN272_c0_g1_i3:4932-289(-)	False	0	27.232	6.01164	10	26	8	1	1547	175.779	6.04	High	High	High	High	Not Found	Not Found	Not Found	Not Found	High	High	Not Found	Not Found	High	High		62.9593	10
False	High	IsMasterProtein	TRINITY_DN56_c0_g2_i1.p1	type:complete gc:universal TRINITY_DN56_c0_g2_i1:160-1725(+)	False	0	27.2153	15.3551	5	26	5	1	521	56.803	5.36	Not Found	Not Found	High	High	Not Found	Not Found	High	High	Not Found	Not Found	Not Found	Not Found	Not Found	Not Found		48.7365	5
False	High	IsMasterProtein	TRINITY_DN3868_c0_g2_i3.p1	type:5prime_partial gc:universal TRINITY_DN3868_c0_g2_i3:1108-35(-)	False	0	27.0288	26.3305	8	25	3	1	357	40.544	5.36	Not Found	Not Found	Not Found	Not Found	Not Found	High	Not Found	Not Found	Not Found	Not Found	High	High	Not Found	Not Found		34.5972	8
False	High	IsMasterProtein	TRINITY_DN549_c1_g1_i1.p1	type:complete gc:universal TRINITY_DN549_c1_g1_i1:2999-759(-)	False	0	26.7177	12.7346	8	25	8	1	746	81.802	5.9	Not Found	Not Found	High	High	Not Found	High	High	High	Not Found	Not Found	High	Not Found	Not Found	Not Found		48.466	8
False	High	IsMasterProtein	TRINITY_DN795_c0_g1_i18.p1	type:5prime_partial gc:universal TRINITY_DN795_c0_g1_i18:2-1684(+)	False	0	26.6426	14.2857	5	25	1	1	560	62.997	5.34	Not Found	Not Found	High	High	Not Found	Not Found	Not Found	Not Found	Not Found	Not Found	High	High	Not Found	Not Found		45.358	5
False	High	IsMasterProtein	TRINITY_DN1149_c4_g1_i3.p1	type:complete gc:universal TRINITY_DN1149_c4_g1_i3:3482-597(-)	False	0	26.3278	6.76379	7	25	7	1	961	108.838	4.55	High	Not Found	High	High	High	High	High	High	Not Found	High	High	High	Not Found	Not Found		85.4642	7
False	High	IsMasterProtein	TRINITY_DN6543_c0_g1_i1.p1	type:complete gc:universal TRINITY_DN6543_c0_g1_i1:3382-941(-)	False	0	26.3066	11.3161	9	25	9	1	813	92.158	6.1	High	High	High	High	High	High	Not Found	High	High	High	High	High	High	High		45.9537	9
False	High	IsMasterProtein	TRINITY_DN29613_c0_g1_i1.p1	type:3prime_partial gc:universal TRINITY_DN29613_c0_g1_i1:611-3(-)	False	0	26.0694	38.4236	7	25	4	1	203	23.099	5.05	Not Found	Not Found	Not Found	Not Found	High	High	Not Found	Not Found	Not Found	Not Found	High	High	Not Found	Not Found		39.411	7
False	High	IsMasterProtein	TRINITY_DN2228_c0_g1_i4.p1	type:complete gc:universal TRINITY_DN2228_c0_g1_i4:2733-1162(-)	False	0	26.0616	12.6195	7	25	7	1	523	56.931	7.47	Not Found	Not Found	High	High	High	Not Found	High	High	High	High	High	High	Not Found	Not Found		59.5126	7
False	High	IsMasterProtein	TRINITY_DN3778_c0_g1_i3.p1	type:5prime_partial gc:universal TRINITY_DN3778_c0_g1_i3:1770-223(-)	False	0	25.9889	12.0388	6	25	6	1	515	56.361	7.56	Not Found	Not Found	High	High	Not Found	Not Found	High	High	Not Found	Not Found	High	High	Not Found	Not Found		33.1677	6
False	High	IsMasterProtein	TRINITY_DN5804_c0_g1_i11.p1	type:complete gc:universal TRINITY_DN5804_c0_g1_i11:122-2146(+)	False	0	25.7405	11.4243	7	25	6	1	674	75.343	7.14	Not Found	Not Found	High	High	High	Not Found	Not Found	Not Found	Not Found	Not Found	High	High	Not Found	Not Found		46.6011	7
False	High	IsMasterProtein	TRINITY_DN16005_c0_g1_i12.p1	type:internal gc:universal TRINITY_DN16005_c0_g1_i12:702-1(-)	False	0	25.6926	33.7607	7	24	1	1	234	26.828	4.86	Not Found	Not Found	High	High	Not Found	Not Found	High	High	Not Found	Not Found	High	High	Not Found	Not Found		74.8555	7
False	High	IsMasterProtein	TRINITY_DN5948_c0_g1_i2.p1	type:complete gc:universal TRINITY_DN5948_c0_g1_i2:5175-2311(-)	False	0	25.6708	7.44235	6	24	6	1	954	104.18	7.17	High	High	High	High	Not Found	Not Found	Not Found	High	High	High	Not Found	Not Found	High	High		51.7128	6
False	High	IsMasterProtein	TRINITY_DN16005_c0_g1_i10.p1	type:internal gc:universal TRINITY_DN16005_c0_g1_i10:702-1(-)	False	0	25.5573	33.7607	7	24	1	1	234	26.8	4.61	Not Found	Not Found	High	High	Not Found	Not Found	Not Found	High	Not Found	Not Found	Not Found	Not Found	Not Found	Not Found		57.3852	7
False	High	IsMasterProtein	TRINITY_DN12915_c0_g1_i1.p1	type:complete gc:universal TRINITY_DN12915_c0_g1_i1:2179-47(-)	False	0	25.4593	9.01408	6	24	6	1	710	79.692	6.64	High	High	Not Found	Not Found	High	Not Found	Not Found	Not Found	High	High	High	High	High	High		46.6708	6
False	High	IsMasterProtein	Cont_Q14532	Keratin, type I cuticular Ha2 OS=Homo sapiens OX=9606 GN=KRT32 PE=1 SV=3	True	0	25.124	15.4018	7	24	1	1	448	50.31	4.84	Not Found	Not Found	Not Found	Not Found	Not Found	Not Found	Not Found	Not Found	High	High	Not Found	Not Found	Not Found	Not Found		91.6954	7
False	High	IsMasterProtein	TRINITY_DN1206_c0_g1_i1.p2	type:complete gc:universal TRINITY_DN1206_c0_g1_i1:4089-2683(-)	False	0	25.1099	16.2393	6	24	6	1	468	50.455	8.92	Not Found	Not Found	Not Found	Not Found	Not Found	Not Found	Not Found	Not Found	Not Found	Not Found	High	High	Not Found	Not Found		30.2508	6
False	High	IsMasterProtein	TRINITY_DN8310_c0_g1_i15.p1	type:5prime_partial gc:universal TRINITY_DN8310_c0_g1_i15:2-4783(+)	False	0	24.9373	4.64532	6	24	6	1	1593	177.865	6.83	High	High	High	High	Not Found	Not Found	High	High	High	High	Not Found	Not Found	High	High		31.5317	6
False	High	IsMasterProtein	Cont_Q9D646	Keratin, type I cuticular Ha4 OS=Mus musculus OX=10090 GN=Krt34 PE=2 SV=1	True	0	24.7644	18.8776	7	24	2	1	392	44.531	4.79	Not Found	Not Found	Not Found	Not Found	Not Found	Not Found	Not Found	Not Found	High	Not Found	Not Found	Not Found	Not Found	High		30.2711	7
False	High	IsMasterProtein	TRINITY_DN11279_c0_g1_i7.p1	type:5prime_partial gc:universal TRINITY_DN11279_c0_g1_i7:2-2161(+)	False	0	24.7362	9.73574	8	23	8	1	719	86.428	8.72	High	High	High	High	High	High	High	High	Not Found	High	High	Not Found	High	Not Found		30.9049	8
False	High	IsMasterProtein	TRINITY_DN2063_c0_g1_i6.p1	type:complete gc:universal TRINITY_DN2063_c0_g1_i6:1922-60(-)	False	0	24.6834	11.129	6	23	6	1	620	70.71	4.78	High	Not Found	High	High	Not Found	Not Found	High	High	High	High	High	High	Not Found	Not Found		51.6725	6
False	High	IsMasterProtein	TRINITY_DN890_c0_g1_i13.p1	type:3prime_partial gc:universal TRINITY_DN890_c0_g1_i13:384-7289(+)	False	0	24.6783	4.86533	9	23	9	1	2302	266.184	5.62	High	High	Not Found	Not Found	Not Found	Not Found	Not Found	High	High	High	High	High	High	High		32.3229	9
False	High	IsMasterProtein	TRINITY_DN3234_c0_g1_i2.p1	type:complete gc:universal TRINITY_DN3234_c0_g1_i2:1277-45(-)	False	0	24.3775	17.0732	6	23	6	1	410	47.045	6.7	Not Found	Not Found	High	High	High	High	Not Found	Not Found	Not Found	Not Found	High	High	Not Found	Not Found		35.5361	6
False	High	IsMasterProtein	TRINITY_DN1618_c0_g1_i1.p1	type:5prime_partial gc:universal TRINITY_DN1618_c0_g1_i1:2-1804(+)	False	0	24.3625	11.3333	5	23	5	1	600	66.305	8.81	Not Found	Not Found	High	High	Not Found	Not Found	Not Found	Not Found	Not Found	Not Found	High	High	Not Found	Not Found		17.5466	5
False	High	IsMasterProtein	TRINITY_DN5413_c0_g1_i4.p1	type:5prime_partial gc:universal TRINITY_DN5413_c0_g1_i4:442-95(-)	False	0	23.8485	38.2609	4	23	2	1	115	12.713	5.22	Not Found	Not Found	High	High	Not Found	Not Found	High	High	Not Found	Not Found	Not Found	Not Found	Not Found	Not Found		85.6705	4
False	High	IsMasterProtein	TRINITY_DN2320_c0_g1_i10.p1	type:complete gc:universal TRINITY_DN2320_c0_g1_i10:6959-1887(-)	False	0	23.7776	5.14793	7	23	7	1	1690	192.375	5.66	Not Found	Not Found	High	High	Not Found	High	High	High	High	Not Found	Not Found	Not Found	Not Found	Not Found		38.9221	7
False	High	IsMasterProtein	TRINITY_DN3780_c0_g2_i2.p1	type:internal gc:universal TRINITY_DN3780_c0_g2_i2:2-691(+)	False	0	23.6835	34.7826	6	23	4	1	230	26.373	6	Not Found	Not Found	High	High	Not Found	Not Found	High	High	Not Found	Not Found	Not Found	Not Found	Not Found	Not Found		48.3075	6
False	High	IsMasterProtein	TRINITY_DN3018_c0_g1_i1.p1	type:complete gc:universal TRINITY_DN3018_c0_g1_i1:112-1731(+)	False	0	23.6556	10.0186	6	23	6	1	539	61.335	5.54	Not Found	Not Found	High	High	Not Found	Not Found	High	High	Not Found	Not Found	High	High	Not Found	Not Found		40.7539	6
False	High	IsMasterProtein	Cont_Q92764	Keratin, type I cuticular Ha5 OS=Homo sapiens OX=9606 GN=KRT35 PE=1 SV=5	True	0	23.5273	13.6264	6	23	3	1	455	50.329	4.91	Not Found	Not Found	Not Found	Not Found	Not Found	Not Found	Not Found	Not Found	High	High	Not Found	Not Found	Not Found	High		86.249	6
False	High	IsMasterProtein	TRINITY_DN1094_c9_g1_i11.p1	type:complete gc:universal TRINITY_DN1094_c9_g1_i11:204-2753(+)	False	0	23.3491	10.4829	7	23	7	1	849	95.102	8	Not Found	Not Found	High	High	High	High	High	High	Not Found	Not Found	High	High	Not Found	Not Found		41.8634	7
False	High	IsMasterProtein	TRINITY_DN5423_c0_g1_i10.p1	type:complete gc:universal TRINITY_DN5423_c0_g1_i10:4118-2550(-)	False	0	23.2096	6.70498	3	22	3	1	522	56.123	6.38	High	High	Not Found	Not Found	High	High	Not Found	High	High	High	Not Found	High	High	High		68.0673	3
False	High	IsMasterProtein	TRINITY_DN1729_c0_g1_i3.p1	type:complete gc:universal TRINITY_DN1729_c0_g1_i3:196-2319(+)	False	0	23.144	10.3253	8	22	7	1	707	79.77	7.17	High	High	High	High	High	High	High	High	High	High	High	High	High	High		53.6591	8
False	High	IsMasterProtein	TRINITY_DN1183_c0_g1_i19.p1	type:5prime_partial gc:universal TRINITY_DN1183_c0_g1_i19:3-1286(+)	False	0	23.1107	19.9063	8	22	7	1	427	48.497	6.21	Not Found	Not Found	Not Found	Not Found	Not Found	Not Found	Not Found	Not Found	Not Found	Not Found	High	High	Not Found	Not Found		30.4065	8
False	High	IsMasterProtein	TRINITY_DN35112_c0_g1_i1.p1	type:complete gc:universal TRINITY_DN35112_c0_g1_i1:1701-169(-)	False	0	23.0845	10.9804	5	22	4	1	510	58.587	8.44	Not Found	Not Found	High	High	Not Found	Not Found	Not Found	Not Found	Not Found	Not Found	High	High	Not Found	Not Found		28.2196	5
False	High	IsMasterProtein	TRINITY_DN1357_c1_g1_i1.p1	type:complete gc:universal TRINITY_DN1357_c1_g1_i1:2239-950(-)	False	0	23.0288	15.3846	6	22	6	1	429	48.143	8.7	High	High	High	High	High	Not Found	High	Not Found	High	High	High	High	High	High		63.0619	6
False	High	IsMasterProtein	TRINITY_DN6692_c0_g1_i4.p2	type:complete gc:universal TRINITY_DN6692_c0_g1_i4:364-1044(+)	False	0	23.0224	27.4336	6	22	6	1	226	26.058	8.31	High	High	High	High	High	High	High	High	High	High	High	High	High	High		57.5303	6
False	High	IsMasterProtein	TRINITY_DN1792_c2_g1_i1.p1	type:internal gc:universal TRINITY_DN1792_c2_g1_i1:3-314(+)	False	0	23.0202	53.8462	4	22	2	1	104	12.278	5.26	Not Found	Not Found	High	High	Not Found	Not Found	High	High	Not Found	Not Found	Not Found	Not Found	Not Found	Not Found		29.845	4
False	High	IsMasterProtein	TRINITY_DN10673_c0_g3_i1.p1	type:internal gc:universal TRINITY_DN10673_c0_g3_i1:2-412(+)	False	0	23.0201	32.1168	4	22	1	1	137	15.471	6	Not Found	Not Found	High	High	Not Found	Not Found	High	High	Not Found	Not Found	Not Found	Not Found	Not Found	Not Found		67.125	4
False	High	IsMasterProtein	TRINITY_DN1041_c0_g1_i14.p1	type:complete gc:universal TRINITY_DN1041_c0_g1_i14:2505-928(-)	False	0	23.0108	12.1905	6	22	3	1	525	60.854	8.15	Not Found	Not Found	High	High	Not Found	Not Found	Not Found	Not Found	Not Found	Not Found	Not Found	Not Found	Not Found	Not Found		77.9253	6
False	High	IsMasterProtein	TRINITY_DN5127_c0_g1_i2.p1	type:5prime_partial gc:universal TRINITY_DN5127_c0_g1_i2:3-1712(+)	False	0	22.8844	9.31459	4	21	4	1	569	64.845	7.65	Not Found	Not Found	Not Found	Not Found	High	High	Not Found	Not Found	Not Found	Not Found	High	High	Not Found	Not Found		48.1118	4
False	High	IsMasterProtein	TRINITY_DN5459_c0_g1_i10.p1	type:complete gc:universal TRINITY_DN5459_c0_g1_i10:1463-147(-)	False	0	22.7598	21.4612	7	21	7	1	438	45.472	8.68	High	High	High	High	High	High	High	High	High	High	High	High	High	High		80.8078	7
False	High	IsMasterProtein	TRINITY_DN3636_c0_g1_i6.p1	type:5prime_partial gc:universal TRINITY_DN3636_c0_g1_i6:3-3212(+)	False	0	22.4413	8.79326	9	21	9	1	1069	121.737	6.81	Not Found	High	Not Found	Not Found	Not Found	High	Not Found	Not Found	High	High	High	High	Not Found	Not Found		20.9724	9
False	High	IsMasterProtein	TRINITY_DN1816_c0_g1_i1.p1	type:complete gc:universal TRINITY_DN1816_c0_g1_i1:100-2058(+)	False	0	22.1885	10.5828	5	21	5	1	652	71.949	7.65	Not Found	Not Found	High	High	High	High	Not Found	Not Found	Not Found	High	Not Found	Not Found	Not Found	High		25.2785	5
False	High	IsMasterProtein	TRINITY_DN3931_c0_g1_i1.p1	type:complete gc:universal TRINITY_DN3931_c0_g1_i1:4845-829(-)	False	0	22.1781	5.75486	6	21	6	1	1338	148.261	5.48	High	High	High	High	Not Found	Not Found	High	High	High	High	Not Found	Not Found	High	High		59.182	6
False	High	IsMasterProtein	TRINITY_DN1761_c0_g1_i2.p1	type:complete gc:universal TRINITY_DN1761_c0_g1_i2:128-2350(+)	False	0	22.1499	10	6	21	6	1	740	80.97	5.08	High	High	High	Not Found	Not Found	Not Found	High	High	High	High	Not Found	Not Found	High	High		35.3851	6
False	High	IsMasterProtein	TRINITY_DN5542_c0_g1_i1.p1	type:complete gc:universal TRINITY_DN5542_c0_g1_i1:106-1749(+)	False	0	22.0204	10.7861	5	21	1	1	547	62.767	8.56	Not Found	Not Found	Not Found	Not Found	Not Found	Not Found	High	Not Found	Not Found	Not Found	Not Found	High	Not Found	Not Found		46.0144	5
False	High	IsMasterProtein	TRINITY_DN13055_c0_g1_i1.p1	type:complete gc:universal TRINITY_DN13055_c0_g1_i1:188-3676(+)	False	0	21.6988	6.79862	7	21	7	1	1162	130.684	6.87	High	High	Not Found	Not Found	High	High	Not Found	High	High	High	High	High	Not Found	High		35.8549	7
False	High	IsMasterProtein	TRINITY_DN1588_c1_g1_i2.p1	type:complete gc:universal TRINITY_DN1588_c1_g1_i2:214-1992(+)	False	0	21.6329	12.5	5	21	5	1	592	64.489	7.25	Not Found	Not Found	High	High	Not Found	Not Found	Not Found	High	Not Found	Not Found	Not Found	Not Found	Not Found	Not Found		27.369	5
False	High	IsMasterProtein	TRINITY_DN3177_c0_g1_i1.p1	type:3prime_partial gc:universal TRINITY_DN3177_c0_g1_i1:615-1160(+)	False	0	21.5274	37.9121	7	21	6	1	182	20.933	9.99	Not Found	High	High	High	High	High	High	High	High	High	High	High	Not Found	Not Found		71.8801	7
False	High	IsMasterProtein	TRINITY_DN1853_c0_g1_i9.p1	type:5prime_partial gc:universal TRINITY_DN1853_c0_g1_i9:2872-1388(-)	False	0	21.4876	12.753	6	21	6	1	494	54.751	7.55	High	High	Not Found	High	Not Found	Not Found	Not Found	Not Found	High	High	Not Found	High	High	High		50.1948	6
False	High	IsMasterProtein	TRINITY_DN3239_c0_g1_i4.p1	type:complete gc:universal TRINITY_DN3239_c0_g1_i4:159-1769(+)	False	0	21.4054	12.1269	7	21	7	1	536	59.355	7.27	Not Found	Not Found	High	High	Not Found	High	High	High	Not Found	Not Found	High	High	Not Found	Not Found		26.6847	7
False	High	IsMasterProtein	TRINITY_DN7828_c0_g1_i1.p1	type:complete gc:universal TRINITY_DN7828_c0_g1_i1:1683-637(-)	False	0	21.3115	25	5	21	5	1	348	39.512	5	High	High	High	High	High	High	High	High	High	High	High	High	High	High		63.0793	5
False	High	IsMasterProtein	TRINITY_DN5430_c0_g1_i2.p1	type:complete gc:universal TRINITY_DN5430_c0_g1_i2:100-5424(+)	False	0	21.2594	3.43856	6	21	6	1	1774	198.88	5.94	Not Found	High	Not Found	Not Found	Not Found	Not Found	High	High	High	High	Not Found	Not Found	High	High		29.9859	6
False	High	IsMasterProtein	TRINITY_DN6049_c0_g1_i1.p2	type:complete gc:universal TRINITY_DN6049_c0_g1_i1:860-471(-)	False	0	21.2479	42.6357	4	21	2	1	129	13.378	10.55	High	High	High	High	Not Found	High	High	High	High	Not Found	Not Found	Not Found	Not Found	High		100.336	4
False	High	IsMasterProtein	TRINITY_DN5420_c0_g1_i2.p1	type:complete gc:universal TRINITY_DN5420_c0_g1_i2:2525-1611(-)	False	0	21.2429	14.4737	3	21	3	1	304	32.892	6.24	High	High	Not Found	Not Found	Not Found	High	Not Found	Not Found	High	High	Not Found	Not Found	High	Not Found		24.8384	3
False	High	IsMasterProtein	TRINITY_DN190_c3_g1_i1.p1	type:complete gc:universal TRINITY_DN190_c3_g1_i1:221-1780(+)	False	0	21.0532	8.09249	4	20	4	1	519	57.235	6.39	High	High	High	High	High	High	High	High	High	High	High	High	High	High		105.198	4
False	High	IsMasterProtein	TRINITY_DN778_c2_g2_i2.p1	type:complete gc:universal TRINITY_DN778_c2_g2_i2:376-3384(+)	False	0	21.0126	7.08583	6	20	6	1	1002	114.679	5.87	High	Not Found	High	High	High	High	High	High	High	High	High	Not Found	Not Found	High		44.3474	6
False	High	IsMasterProtein	TRINITY_DN1448_c0_g1_i1.p1	type:complete gc:universal TRINITY_DN1448_c0_g1_i1:2790-595(-)	False	0	20.9645	7.93434	6	20	6	1	731	82.336	7.43	Not Found	Not Found	Not Found	High	High	High	Not Found	High	Not Found	Not Found	High	High	Not Found	Not Found		54.2328	6
False	High	IsMasterProtein	TRINITY_DN3303_c0_g1_i13.p1	type:complete gc:universal TRINITY_DN3303_c0_g1_i13:122-1396(+)	False	0	20.9447	10.6132	4	20	4	1	424	48.154	6.07	Not Found	Not Found	Not Found	Not Found	High	High	Not Found	Not Found	Not Found	Not Found	High	High	Not Found	Not Found		35.1412	4
False	High	IsMasterProtein	TRINITY_DN2236_c0_g1_i4.p1	type:complete gc:universal TRINITY_DN2236_c0_g1_i4:1395-64(-)	False	0	20.6913	13.0926	5	20	5	1	443	50.507	5.16	Not Found	Not Found	High	High	High	High	High	High	Not Found	Not Found	High	High	Not Found	Not Found		47.8557	5
False	High	IsMasterProtein	TRINITY_DN2008_c0_g1_i4.p1	type:complete gc:universal TRINITY_DN2008_c0_g1_i4:372-3494(+)	False	0	20.6877	6.92308	7	20	7	1	1040	115.597	5.4	Not Found	High	High	High	Not Found	Not Found	High	High	High	High	Not Found	Not Found	Not Found	High		41.7056	7
False	High	IsMasterProtein	TRINITY_DN1094_c2_g1_i6.p1	type:complete gc:universal TRINITY_DN1094_c2_g1_i6:23-3829(+)	False	0	20.5975	8.20189	8	20	8	1	1268	139.609	6	Not Found	High	Not Found	Not Found	Not Found	Not Found	Not Found	Not Found	High	High	Not Found	Not Found	High	High		19.6095	8
False	High	IsMasterProtein	TRINITY_DN11362_c0_g1_i10.p1	type:complete gc:universal TRINITY_DN11362_c0_g1_i10:3043-230(-)	False	0	20.5314	4.69584	5	20	5	1	937	105.12	5.22	Not Found	Not Found	High	High	High	Not Found	High	High	Not Found	Not Found	High	High	Not Found	Not Found		45.9407	5
False	High	IsMasterProtein	TRINITY_DN1634_c0_g1_i1.p1	type:complete gc:universal TRINITY_DN1634_c0_g1_i1:216-1775(+)	False	0	20.3496	5.78035	4	20	4	1	519	56.492	8.63	High	High	Not Found	High	High	High	High	High	High	High	High	High	Not Found	Not Found		48.0603	4
False	High	IsMasterProtein	Cont_Q14525	Keratin, type I cuticular Ha3-II OS=Homo sapiens OX=9606 GN=KRT33B PE=1 SV=3	True	0	20.1845	14.604	7	20	1	1	404	46.185	4.84	Not Found	Not Found	Not Found	Not Found	Not Found	Not Found	Not Found	Not Found	High	High	Not Found	Not Found	Not Found	Not Found		101.355	7
False	High	IsMasterProtein	TRINITY_DN15377_c0_g1_i2.p1	type:internal gc:universal TRINITY_DN15377_c0_g1_i2:497-3(-)	False	0	19.966	23.0303	4	20	1	1	165	19.318	9.28	Not Found	Not Found	Not Found	Not Found	Not Found	Not Found	Not Found	Not Found	Not Found	Not Found	High	High	Not Found	Not Found		81.7786	4
False	High	IsMasterProtein	TRINITY_DN2810_c0_g1_i10.p2	type:complete gc:universal TRINITY_DN2810_c0_g1_i10:7619-6189(-)	False	0	19.9563	10.5042	5	20	5	1	476	52.051	8.24	High	High	High	High	High	High	High	High	High	High	High	High	High	High		82.1765	5
False	High	IsMasterProtein	TRINITY_DN2823_c0_g2_i1.p1	type:5prime_partial gc:universal TRINITY_DN2823_c0_g2_i1:2878-77(-)	False	0	19.8359	5.46624	4	20	4	1	933	105.24	5.52	High	High	High	High	High	High	High	High	High	High	High	High	High	High		61.0217	4
False	High	IsMasterProtein	TRINITY_DN2654_c0_g1_i9.p1	type:5prime_partial gc:universal TRINITY_DN2654_c0_g1_i9:1-1485(+)	False	0	19.7702	12.1457	7	20	1	1	494	56.894	6.9	Not Found	Not Found	High	High	Not Found	Not Found	High	High	Not Found	Not Found	Not Found	Not Found	Not Found	Not Found		45.5762	7
False	High	IsMasterProtein	TRINITY_DN996_c0_g1_i1.p1	type:complete gc:universal TRINITY_DN996_c0_g1_i1:1614-49(-)	False	0	19.7293	8.4453	5	20	3	1	521	59.168	8.79	Not Found	Not Found	High	High	Not Found	Not Found	High	High	Not Found	Not Found	Not Found	Not Found	Not Found	Not Found		90.7348	5
False	High	IsMasterProtein	TRINITY_DN2246_c0_g1_i10.p1	type:complete gc:universal TRINITY_DN2246_c0_g1_i10:285-1985(+)	False	0	19.5864	6.89046	3	19	3	1	566	62.582	8.19	Not Found	Not Found	Not Found	Not Found	High	High	Not Found	Not Found	Not Found	Not Found	High	High	Not Found	Not Found		19.705	3
False	High	IsMasterProtein	TRINITY_DN657_c0_g1_i42.p1	type:complete gc:universal TRINITY_DN657_c0_g1_i42:3202-566(-)	False	0	19.4866	6.83371	6	19	6	1	878	102.706	5.55	Not Found	High	High	High	High	High	High	High	Not Found	Not Found	High	High	Not Found	Not Found		39.5331	6
False	High	IsMasterProtein	TRINITY_DN7232_c0_g1_i10.p1	type:complete gc:universal TRINITY_DN7232_c0_g1_i10:1590-202(-)	False	0	19.4301	13.4199	6	19	6	1	462	52.603	8.13	Not Found	Not Found	Not Found	Not Found	High	High	Not Found	Not Found	Not Found	Not Found	High	High	Not Found	Not Found		28.8686	6
False	High	IsMasterProtein	TRINITY_DN1637_c0_g1_i18.p1	type:complete gc:universal TRINITY_DN1637_c0_g1_i18:5319-1582(-)	False	0	19.2806	5.22088	6	19	6	1	1245	142.849	8.75	Not Found	Not Found	High	High	High	High	High	High	Not Found	Not Found	High	Not Found	Not Found	Not Found		24.1691	6
False	High	IsMasterProtein	TRINITY_DN9120_c0_g1_i13.p1	type:internal gc:universal TRINITY_DN9120_c0_g1_i13:1-4338(+)	False	0	19.2311	6.29322	8	19	8	1	1446	163.691	5.58	High	High	High	Not Found	Not Found	Not Found	High	High	High	High	Not Found	Not Found	High	High		18.2355	8
False	High	IsMasterProtein	TRINITY_DN973_c0_g1_i11.p1	type:complete gc:universal TRINITY_DN973_c0_g1_i11:2261-909(-)	False	0	19.0537	10	4	19	4	1	450	51.148	5.1	Not Found	Not Found	High	High	High	High	High	High	Not Found	Not Found	High	High	Not Found	Not Found		81.0221	4
False	High	IsMasterProtein	TRINITY_DN1672_c0_g1_i1.p1	type:complete gc:universal TRINITY_DN1672_c0_g1_i1:113-727(+)	False	0	18.846	28.4314	6	19	6	1	204	24.032	11.85	High	High	High	High	High	High	High	High	High	High	High	High	High	High		82.5702	6
False	High	IsMasterProtein	TRINITY_DN17436_c0_g1_i11.p1	type:internal gc:universal TRINITY_DN17436_c0_g1_i11:2-700(+)	False	0	18.8372	22.3176	5	19	1	1	233	26.749	5	Not Found	Not Found	High	Not Found	Not Found	Not Found	Not Found	Not Found	Not Found	Not Found	Not Found	Not Found	Not Found	Not Found		55.227	5
False	High	IsMasterProtein	TRINITY_DN3583_c0_g1_i2.p1	type:5prime_partial gc:universal TRINITY_DN3583_c0_g1_i2:1430-90(-)	False	0	18.7817	11.6592	5	19	5	1	446	50.845	6.9	Not Found	Not Found	Not Found	Not Found	Not Found	Not Found	Not Found	Not Found	Not Found	Not Found	High	High	Not Found	Not Found		20.9606	5
False	High	IsMasterProtein	TRINITY_DN6289_c0_g1_i7.p1	type:5prime_partial gc:universal TRINITY_DN6289_c0_g1_i7:2-1813(+)	False	0	18.6893	10.1161	5	19	5	1	603	67.913	7.12	Not Found	Not Found	High	High	Not Found	Not Found	High	High	Not Found	Not Found	Not Found	High	Not Found	Not Found		33.5897	5
False	High	IsMasterProtein	TRINITY_DN1454_c0_g1_i13.p1	type:complete gc:universal TRINITY_DN1454_c0_g1_i13:124-2073(+)	False	0	18.6462	8.16641	5	19	5	1	649	74.409	5.15	Not Found	Not Found	High	High	High	High	High	High	Not Found	Not Found	High	High	Not Found	Not Found		38.122	5
False	High	IsMasterProtein	TRINITY_DN20781_c0_g1_i2.p1	type:3prime_partial gc:universal TRINITY_DN20781_c0_g1_i2:68-1087(+)	False	0	18.5958	13.8235	5	19	4	1	340	39.448	5.91	Not Found	Not Found	High	High	High	High	High	High	Not Found	Not Found	Not Found	High	Not Found	Not Found		47.4381	5
False	High	IsMasterProtein	TRINITY_DN5203_c0_g1_i1.p1	type:complete gc:universal TRINITY_DN5203_c0_g1_i1:233-1732(+)	False	0	18.5105	8.01603	3	19	3	1	499	54.181	8.37	High	High	High	High	Not Found	High	High	High	High	High	High	High	High	High		69.7242	3
False	High	IsMasterProtein	TRINITY_DN1242_c0_g1_i1.p1	type:complete gc:universal TRINITY_DN1242_c0_g1_i1:1605-46(-)	False	0	18.4991	7.12909	4	19	3	1	519	57.404	8.18	High	High	High	High	High	High	High	High	High	High	Not Found	High	High	High		105.169	4
False	High	IsMasterProtein	TRINITY_DN2197_c0_g1_i4.p1	type:complete gc:universal TRINITY_DN2197_c0_g1_i4:3676-101(-)	False	0	18.3887	6.80101	7	19	7	1	1191	141.039	7.96	High	High	Not Found	Not Found	Not Found	Not Found	Not Found	Not Found	High	High	Not Found	High	Not Found	High		10.1873	7
False	High	IsMasterProtein	TRINITY_DN12036_c0_g1_i1.p1	type:5prime_partial gc:universal TRINITY_DN12036_c0_g1_i1:512-63(-)	False	0	18.3685	28.1879	4	19	1	1	149	16.951	8.63	Not Found	Not Found	High	High	Not Found	Not Found	High	High	Not Found	Not Found	Not Found	Not Found	Not Found	Not Found		59.4056	4
False	High	IsMasterProtein	TRINITY_DN10698_c0_g1_i1.p1	type:internal gc:universal TRINITY_DN10698_c0_g1_i1:3-482(+)	False	0	18.2001	8.125	1	19	1	1	160	18.234	6.54	Not Found	High	High	High	Not Found	Not Found	High	High	Not Found	High	Not Found	Not Found	Not Found	Not Found		40.789	1
False	High	IsMasterProtein	TRINITY_DN746_c0_g1_i2.p1	type:complete gc:universal TRINITY_DN746_c0_g1_i2:2758-494(-)	False	0	18.199	10.8753	6	18	6	1	754	84.607	5.2	High	High	High	High	High	High	High	High	High	High	High	High	High	Not Found		76.0702	6
False	High	IsMasterProtein	TRINITY_DN361_c0_g1_i1.p1	type:complete gc:universal TRINITY_DN361_c0_g1_i1:1879-116(-)	False	0	18.1325	7.6661	3	18	3	1	587	63.909	5.45	High	High	Not Found	Not Found	Not Found	Not Found	Not Found	Not Found	High	High	Not Found	Not Found	High	High		27.3561	3
False	High	IsMasterProtein	TRINITY_DN3679_c0_g1_i1.p1	type:complete gc:universal TRINITY_DN3679_c0_g1_i1:2640-1852(-)	False	0	17.99	21.374	6	18	4	1	262	29.766	4.86	Not Found	Not Found	Not Found	Not Found	Not Found	Not Found	Not Found	Not Found	High	High	Not Found	Not Found	High	High		32.3396	6
False	High	IsMasterProtein	TRINITY_DN407_c0_g1_i3.p1	type:complete gc:universal TRINITY_DN407_c0_g1_i3:3718-593(-)	False	0	17.9589	4.70701	3	18	3	1	1041	115.014	5.71	High	High	High	Not Found	Not Found	Not Found	Not Found	Not Found	Not Found	Not Found	Not Found	Not Found	Not Found	Not Found		18.4684	3
False	High	IsMasterProtein	TRINITY_DN3942_c0_g1_i1.p1	type:complete gc:universal TRINITY_DN3942_c0_g1_i1:2604-1621(-)	False	0	17.9256	12.844	3	18	3	1	327	34.457	6.87	High	High	High	High	High	High	High	High	High	High	High	High	High	High		77.4416	3
False	High	IsMasterProtein	TRINITY_DN256_c0_g2_i7.p1	type:complete gc:universal TRINITY_DN256_c0_g2_i7:210-1136(+)	False	0	17.8197	10.0649	3	18	3	1	308	34.111	6.89	High	High	Not Found	Not Found	High	High	Not Found	Not Found	High	High	High	High	High	High		39.5049	3
False	High	IsMasterProtein	TRINITY_DN2615_c0_g1_i2.p1	type:complete gc:universal TRINITY_DN2615_c0_g1_i2:78-1997(+)	False	0	17.7915	9.23318	5	18	5	1	639	71.227	6.8	High	High	High	High	High	High	High	High	High	High	High	High	Not Found	Not Found		51.7819	5
False	High	IsMasterProtein	TRINITY_DN608_c0_g1_i8.p1	type:complete gc:universal TRINITY_DN608_c0_g1_i8:2929-506(-)	False	0	17.7904	7.31103	5	18	5	1	807	89.301	5.47	High	High	Not Found	Not Found	High	High	High	High	High	Not Found	High	High	Not Found	Not Found		20.4742	5
False	High	IsMasterProtein	TRINITY_DN156_c0_g1_i22.p1	type:5prime_partial gc:universal TRINITY_DN156_c0_g1_i22:768-232(-)	False	0	17.574	23.0337	4	18	1	1	178	20.118	8.81	Not Found	Not Found	High	High	Not Found	Not Found	Not Found	Not Found	Not Found	Not Found	Not Found	Not Found	Not Found	Not Found		38.2921	4
False	High	IsMasterProtein	TRINITY_DN311_c0_g1_i4.p1	type:complete gc:universal TRINITY_DN311_c0_g1_i4:2066-330(-)	False	0	17.4132	10.3806	5	17	5	1	578	63.697	7.11	Not Found	Not Found	Not Found	Not Found	High	High	Not Found	Not Found	Not Found	Not Found	High	High	Not Found	Not Found		23.7112	5
False	High	IsMasterProtein	Cont_P07744	Keratin, type II cytoskeletal 4 OS=Mus musculus OX=10090 GN=Krt4 PE=1 SV=2	True	0	17.3765	8.95238	7	17	1	1	525	56.248	8.15	Not Found	Not Found	Not Found	Not Found	Not Found	High	Not Found	Not Found	Not Found	Not Found	Not Found	Not Found	Not Found	Not Found		48.5691	7
False	High	IsMasterProtein	TRINITY_DN31387_c0_g1_i1.p1	type:complete gc:universal TRINITY_DN31387_c0_g1_i1:41-418(+)	False	0	17.3547	18.4	3	17	1	1	125	13.456	10.73	High	High	Not Found	Not Found	High	High	Not Found	Not Found	Not Found	Not Found	Not Found	Not Found	Not Found	Not Found		61.1863	3
False	High	IsMasterProtein	TRINITY_DN4689_c0_g1_i12.p1	type:3prime_partial gc:universal TRINITY_DN4689_c0_g1_i12:4060-2(-)	False	0	17.0814	5.2476	6	17	3	1	1353	150.527	7.09	Not Found	Not Found	Not Found	High	Not Found	Not Found	Not Found	Not Found	High	High	Not Found	Not Found	Not Found	Not Found		33.839	6
False	High	IsMasterProtein	TRINITY_DN28582_c0_g1_i1.p1	type:complete gc:universal TRINITY_DN28582_c0_g1_i1:157-690(+)	False	0	17.0698	27.1186	4	17	4	1	177	20.3	8.94	High	High	Not Found	Not Found	Not Found	Not Found	High	High	High	High	High	High	Not Found	High		40.9966	4
False	High	IsMasterProtein	Cont_P63103	14-3-3 protein zeta/delta OS=Bos taurus OX=9913 GN=YWHAZ PE=1 SV=1	True	0	16.8908	20.8163	4	17	2	1	245	27.728	4.79	High	Not Found	Not Found	Not Found	High	High	Not Found	High	High	High	Not Found	High	Not Found	High		38.8969	4
False	High	IsMasterProtein	TRINITY_DN11285_c0_g1_i1.p1	type:complete gc:universal TRINITY_DN11285_c0_g1_i1:2-637(+)	False	0	16.8332	26.5403	5	17	4	1	211	24.02	6.04	Not Found	Not Found	Not Found	Not Found	High	High	Not Found	Not Found	Not Found	Not Found	High	High	Not Found	Not Found		40.6128	5
False	High	IsMasterProtein	TRINITY_DN605_c0_g1_i11.p1	type:complete gc:universal TRINITY_DN605_c0_g1_i11:4634-3192(-)	False	0	16.8312	8.95833	5	17	5	1	480	55.65	8.85	High	High	Not Found	Not Found	Not Found	Not Found	High	High	High	High	Not Found	Not Found	High	High		28.5449	5
False	High	IsMasterProtein	TRINITY_DN831_c0_g1_i19.p1	type:5prime_partial gc:universal TRINITY_DN831_c0_g1_i19:2109-91(-)	False	0	16.7575	8.63095	6	17	6	1	672	76.312	6.81	Not Found	Not Found	High	High	High	Not Found	Not Found	Not Found	Not Found	Not Found	High	High	Not Found	Not Found		26.8611	6
False	High	IsMasterProtein	TRINITY_DN9000_c0_g2_i2.p1	type:complete gc:universal TRINITY_DN9000_c0_g2_i2:72-1070(+)	False	0	16.727	15.0602	4	17	4	1	332	36.987	4.55	Not Found	Not Found	Not Found	Not Found	Not Found	High	Not Found	Not Found	Not Found	Not Found	High	High	Not Found	Not Found		18.4925	4
False	High	IsMasterProtein	TRINITY_DN3391_c0_g1_i1.p1	type:complete gc:universal TRINITY_DN3391_c0_g1_i1:598-2133(+)	False	0	16.6344	9.98043	4	17	4	1	511	58.601	8.57	Not Found	Not Found	High	High	Not Found	Not Found	High	High	Not Found	Not Found	Not Found	Not Found	Not Found	Not Found		17.7997	4
False	High	IsMasterProtein	TRINITY_DN1583_c0_g1_i10.p1	type:5prime_partial gc:universal TRINITY_DN1583_c0_g1_i10:2215-467(-)	False	0	16.4808	6.01375	3	16	3	1	582	66.551	4.67	Not Found	Not Found	Not Found	Not Found	High	High	Not Found	Not Found	Not Found	Not Found	High	High	Not Found	Not Found		23.5372	3
False	High	IsMasterProtein	TRINITY_DN5676_c0_g1_i2.p1	type:complete gc:universal TRINITY_DN5676_c0_g1_i2:125-1543(+)	False	0	16.4673	10.1695	3	16	3	1	472	51.331	6.92	High	High	Not Found	Not Found	Not Found	Not Found	High	High	High	High	Not Found	Not Found	High	High		41.4549	3
False	High	IsMasterProtein	TRINITY_DN118_c1_g1_i1.p1	type:complete gc:universal TRINITY_DN118_c1_g1_i1:1815-439(-)	False	0	16.4118	14.8472	4	16	4	1	458	51.247	8.81	Not Found	Not Found	Not Found	Not Found	Not Found	Not Found	Not Found	Not Found	Not Found	Not Found	High	High	Not Found	Not Found		14.5781	4
False	High	IsMasterProtein	TRINITY_DN19979_c0_g1_i1.p1	type:complete gc:universal TRINITY_DN19979_c0_g1_i1:132-947(+)	False	0	16.3285	12.5461	4	16	4	1	271	30.392	10.95	Not Found	High	High	High	High	High	Not Found	Not Found	High	High	High	High	Not Found	High		38.9137	4
False	High	IsMasterProtein	TRINITY_DN56_c0_g1_i9.p1	type:5prime_partial gc:universal TRINITY_DN56_c0_g1_i9:1-1650(+)	False	0	16.3111	9.83607	4	16	4	1	549	59.742	6.19	Not Found	Not Found	High	High	Not Found	High	High	High	Not Found	Not Found	Not Found	Not Found	Not Found	Not Found		32.2678	4
False	High	IsMasterProtein	TRINITY_DN184_c0_g1_i4.p1	type:complete gc:universal TRINITY_DN184_c0_g1_i4:1684-161(-)	False	0	16.2873	8.28402	5	16	3	1	507	56.122	7.77	High	High	Not Found	High	High	High	High	High	High	High	High	High	Not Found	High		85.6108	5
False	High	IsMasterProtein	TRINITY_DN4994_c1_g1_i2.p1	type:complete gc:universal TRINITY_DN4994_c1_g1_i2:252-1805(+)	False	0	16.1801	9.47776	4	16	3	1	517	58.762	8.43	Not Found	Not Found	High	High	Not Found	Not Found	High	High	Not Found	Not Found	Not Found	Not Found	Not Found	Not Found		39.5498	4
False	High	IsMasterProtein	TRINITY_DN3981_c0_g1_i2.p1	type:complete gc:universal TRINITY_DN3981_c0_g1_i2:3895-2603(-)	False	0	16.1395	11.6279	5	16	5	1	430	47.86	8.73	Not Found	Not Found	Not Found	Not Found	Not Found	Not Found	Not Found	Not Found	Not Found	Not Found	High	High	Not Found	Not Found		18.7291	5
False	High	IsMasterProtein	TRINITY_DN2838_c0_g1_i1.p1	type:complete gc:universal TRINITY_DN2838_c0_g1_i1:344-1789(+)	False	0	16.1021	12.2661	4	16	4	1	481	54.21	6.29	Not Found	Not Found	High	Not Found	Not Found	Not Found	High	High	Not Found	Not Found	Not Found	Not Found	Not Found	Not Found		22.7788	4
False	High	IsMasterProtein	TRINITY_DN3500_c0_g1_i3.p1	type:complete gc:universal TRINITY_DN3500_c0_g1_i3:2906-540(-)	False	0	15.9855	6.9797	5	16	5	1	788	85.354	8.29	Not Found	Not Found	High	High	Not Found	Not Found	High	High	Not Found	Not Found	High	High	Not Found	Not Found		32.0946	5
False	High	IsMasterProtein	TRINITY_DN3411_c0_g1_i1.p1	type:complete gc:universal TRINITY_DN3411_c0_g1_i1:651-91(-)	False	0	15.9135	18.2796	3	16	3	1	186	21.182	7.83	High	High	High	High	High	High	High	High	High	High	High	High	High	High		51.4376	3
False	High	IsMasterProtein	TRINITY_DN9012_c0_g1_i2.p2	type:3prime_partial gc:universal TRINITY_DN9012_c0_g1_i2:299-3(-)	False	0	15.8929	54.5455	5	16	5	1	99	9.931	5.06	Not Found	Not Found	High	High	High	High	High	High	Not Found	Not Found	High	High	Not Found	Not Found		59.8257	5
False	High	IsMasterProtein	TRINITY_DN2439_c0_g1_i1.p1	type:complete gc:universal TRINITY_DN2439_c0_g1_i1:254-721(+)	False	0	15.8652	25.8065	4	16	4	1	155	17.837	9.73	High	High	High	High	High	High	High	High	High	High	High	High	High	High		92.8003	4
False	High	IsMasterProtein	TRINITY_DN6694_c0_g1_i1.p1	type:3prime_partial gc:universal TRINITY_DN6694_c0_g1_i1:172-1128(+)	False	0	15.8549	18.1818	5	16	5	1	319	35.237	8.95	High	High	High	High	High	High	High	High	High	High	High	High	High	High		77.5474	5
False	High	IsMasterProtein	TRINITY_DN3621_c1_g2_i1.p1	type:complete gc:universal TRINITY_DN3621_c1_g2_i1:4520-3141(-)	False	0	15.8143	9.36819	4	16	4	1	459	50.13	5.73	High	High	High	High	Not Found	Not Found	High	High	High	High	High	High	High	High		34.7539	4
False	High	IsMasterProtein	TRINITY_DN795_c1_g2_i1.p1	type:3prime_partial gc:universal TRINITY_DN795_c1_g2_i1:597-1(-)	False	0	15.6898	27.1357	3	15	3	1	199	21.869	8.15	Not Found	Not Found	Not Found	High	High	High	Not Found	Not Found	High	Not Found	High	High	Not Found	Not Found		28.9838	3
False	High	IsMasterProtein	TRINITY_DN1712_c0_g1_i10.p1	type:complete gc:universal TRINITY_DN1712_c0_g1_i10:254-1519(+)	False	0	15.6204	12.114	6	15	6	1	421	49.273	7.66	Not Found	Not Found	High	High	Not Found	Not Found	High	High	Not Found	Not Found	High	High	Not Found	Not Found		30.4632	6
False	High	IsMasterProtein	TRINITY_DN4900_c0_g1_i1.p1	type:complete gc:universal TRINITY_DN4900_c0_g1_i1:201-3425(+)	False	0	15.5747	6.42458	7	15	7	1	1074	122.769	6.07	High	High	Not Found	Not Found	Not Found	Not Found	Not Found	Not Found	High	High	Not Found	Not Found	Not Found	High		10.229	7
False	High	IsMasterProtein	TRINITY_DN2360_c0_g1_i2.p1	type:complete gc:universal TRINITY_DN2360_c0_g1_i2:199-3462(+)	False	0	15.3148	6.89972	6	15	6	1	1087	119.972	7.88	High	High	Not Found	Not Found	Not Found	High	Not Found	Not Found	High	High	High	Not Found	High	High		21.7939	6
False	High	IsMasterProtein	TRINITY_DN20404_c0_g1_i9.p1	type:complete gc:universal TRINITY_DN20404_c0_g1_i9:171-3269(+)	False	0	15.2824	7.65504	6	15	6	1	1032	111.666	6.68	Not Found	Not Found	High	High	Not Found	Not Found	Not Found	Not Found	High	High	Not Found	Not Found	Not Found	High		18.3906	6
False	High	IsMasterProtein	TRINITY_DN2082_c1_g1_i1.p1	type:5prime_partial gc:universal TRINITY_DN2082_c1_g1_i1:1-663(+)	False	0	15.2702	20.9091	5	15	1	1	220	25.373	9.66	Not Found	Not Found	High	High	Not Found	Not Found	Not Found	Not Found	Not Found	Not Found	Not Found	Not Found	Not Found	Not Found		41.0138	5
False	High	IsMasterProtein	TRINITY_DN3015_c0_g1_i3.p2	type:complete gc:universal TRINITY_DN3015_c0_g1_i3:145-897(+)	False	0	15.2382	14.8	4	15	3	1	250	27.994	6.79	Not Found	Not Found	Not Found	Not Found	High	High	Not Found	Not Found	Not Found	Not Found	High	High	Not Found	Not Found		27.1917	4
False	High	IsMasterProtein	TRINITY_DN94_c0_g1_i2.p1	type:complete gc:universal TRINITY_DN94_c0_g1_i2:2644-1043(-)	False	0	15.0938	10.8818	6	15	5	1	533	59.84	5.63	Not Found	Not Found	High	High	Not Found	Not Found	High	High	High	Not Found	High	Not Found	Not Found	Not Found		26.9919	6
False	High	IsMasterProtein	TRINITY_DN133_c1_g1_i1.p1	type:5prime_partial gc:universal TRINITY_DN133_c1_g1_i1:3-1547(+)	False	0	15.0654	11.6732	6	15	5	1	514	57.745	8.21	Not Found	Not Found	Not Found	Not Found	High	High	Not Found	Not Found	Not Found	Not Found	High	High	Not Found	Not Found		24.4142	6
False	High	IsMasterProtein	TRINITY_DN4645_c0_g1_i2.p1	type:3prime_partial gc:universal TRINITY_DN4645_c0_g1_i2:397-3357(+)	False	0	15.0135	7.49747	6	15	6	1	987	107.764	6.83	Not Found	Not Found	High	High	High	High	High	High	Not Found	Not Found	High	High	Not Found	Not Found		25.2698	6
False	High	IsMasterProtein	TRINITY_DN9302_c0_g1_i10.p1	type:complete gc:universal TRINITY_DN9302_c0_g1_i10:3168-1402(-)	False	0	14.997	8.16327	5	15	5	1	588	67.088	6.23	Not Found	Not Found	High	High	Not Found	Not Found	High	High	Not Found	Not Found	Not Found	Not Found	Not Found	Not Found		36.6026	5
False	High	IsMasterProtein	TRINITY_DN6341_c0_g1_i11.p1	type:complete gc:universal TRINITY_DN6341_c0_g1_i11:2575-1364(-)	False	0	14.986	8.43672	4	15	4	1	403	45.516	7.14	Not Found	Not Found	Not Found	Not Found	High	High	Not Found	Not Found	Not Found	Not Found	High	High	Not Found	Not Found		17.6706	4
False	High	IsMasterProtein	TRINITY_DN3165_c0_g1_i15.p1	type:complete gc:universal TRINITY_DN3165_c0_g1_i15:475-2028(+)	False	0	14.9321	11.2186	6	15	6	1	517	57.438	8.41	Not Found	Not Found	Not Found	Not Found	High	High	Not Found	Not Found	Not Found	Not Found	High	High	Not Found	Not Found		25.0831	6
False	High	IsMasterProtein	TRINITY_DN9915_c0_g1_i1.p1	type:5prime_partial gc:universal TRINITY_DN9915_c0_g1_i1:6507-1123(-)	False	0	14.8761	2.39688	4	15	4	1	1794	199.944	5.39	Not Found	Not Found	Not Found	Not Found	Not Found	Not Found	Not Found	Not Found	High	High	Not Found	Not Found	Not Found	High		21.1114	4
False	High	IsMasterProtein	TRINITY_DN7237_c0_g1_i2.p1	type:complete gc:universal TRINITY_DN7237_c0_g1_i2:2502-1018(-)	False	0	14.7594	13.5628	7	15	7	1	494	57.083	8.1	Not Found	Not Found	High	High	High	High	High	High	Not Found	Not Found	High	High	Not Found	Not Found		22.0938	7
False	High	IsMasterProtein	TRINITY_DN4789_c0_g1_i1.p1	type:complete gc:universal TRINITY_DN4789_c0_g1_i1:141-1469(+)	False	0	14.6564	12.8959	6	14	6	1	442	50.831	7.55	High	High	High	High	High	High	High	High	High	High	High	High	High	High		61.9032	6
False	High	IsMasterProtein	TRINITY_DN1013_c0_g1_i1.p1	type:complete gc:universal TRINITY_DN1013_c0_g1_i1:417-2477(+)	False	0	14.6528	2.04082	1	14	1	1	686	78.708	8.1	High	High	Not Found	High	High	High	High	High	High	High	High	High	High	High		49.4995	1
False	High	IsMasterProtein	Cont_Q9NSB4	Keratin, type II cuticular Hb2 OS=Homo sapiens OX=9606 GN=KRT82 PE=1 SV=3	True	0	14.6076	8.38207	5	14	4	1	513	56.616	6.74	Not Found	Not Found	Not Found	Not Found	Not Found	Not Found	Not Found	Not Found	High	High	Not Found	Not Found	Not Found	High		19.506	5
False	High	IsMasterProtein	TRINITY_DN11407_c0_g1_i4.p1	type:internal gc:universal TRINITY_DN11407_c0_g1_i4:418-2(-)	False	0	14.5854	32.3741	4	14	2	1	139	16.332	9.77	Not Found	Not Found	High	High	Not Found	Not Found	Not Found	Not Found	Not Found	Not Found	Not Found	Not Found	Not Found	Not Found		24.6323	4
False	High	IsMasterProtein	TRINITY_DN2190_c0_g1_i6.p1	type:complete gc:universal TRINITY_DN2190_c0_g1_i6:1154-159(-)	False	0	14.5264	12.6888	4	14	4	1	331	37.606	9.72	High	High	High	High	Not Found	Not Found	High	High	High	High	High	High	High	High		36.7901	4
False	High	IsMasterProtein	TRINITY_DN2790_c0_g1_i1.p2	type:complete gc:universal TRINITY_DN2790_c0_g1_i1:811-359(-)	False	0	14.5137	22	5	14	5	1	150	16.535	9.64	High	High	Not Found	High	High	High	High	High	High	High	High	Not Found	High	High		48.9671	5
False	High	IsMasterProtein	Cont_Q7Z3Y9	Keratin, type I cytoskeletal 26 OS=Homo sapiens OX=9606 GN=KRT26 PE=1 SV=2	True	0	14.4191	5.76923	3	14	1	1	468	51.878	4.92	High	High	Not Found	Not Found	Not Found	Not Found	Not Found	Not Found	Not Found	Not Found	Not Found	Not Found	Not Found	Not Found		167.685	3
False	High	IsMasterProtein	TRINITY_DN3544_c3_g1_i1.p1	type:internal gc:universal TRINITY_DN3544_c3_g1_i1:2-982(+)	False	0	14.408	8.8685	2	14	1	1	327	37.174	8.9	Not Found	Not Found	High	High	Not Found	High	High	High	Not Found	Not Found	High	High	Not Found	Not Found		31.7394	2
False	High	IsMasterProtein	TRINITY_DN2354_c0_g1_i3.p1	type:complete gc:universal TRINITY_DN2354_c0_g1_i3:72-1514(+)	False	0	14.3546	9.58333	5	14	5	1	480	54.799	5.91	Not Found	Not Found	High	High	Not Found	High	High	Not Found	Not Found	Not Found	High	High	Not Found	Not Found		33.4205	5
False	High	IsMasterProtein	TRINITY_DN3632_c0_g1_i1.p1	type:internal gc:universal TRINITY_DN3632_c0_g1_i1:2-961(+)	False	0	14.3118	13.4375	5	14	4	1	320	36.89	8.57	Not Found	Not Found	High	High	High	High	High	High	Not Found	Not Found	High	High	Not Found	Not Found		51.883	5
False	High	IsMasterProtein	TRINITY_DN5698_c0_g1_i5.p1	type:internal gc:universal TRINITY_DN5698_c0_g1_i5:2-1225(+)	False	0	14.2643	11.7647	6	14	1	1	408	46.205	8.41	Not Found	Not Found	High	High	Not Found	Not Found	Not Found	Not Found	Not Found	Not Found	Not Found	Not Found	Not Found	Not Found		45.4268	6
False	High	IsMasterProtein	TRINITY_DN7612_c0_g1_i3.p1	type:3prime_partial gc:universal TRINITY_DN7612_c0_g1_i3:2288-3(-)	False	0	14.216	5.24934	3	14	3	1	762	82.501	6.39	Not Found	Not Found	High	High	Not Found	Not Found	Not Found	Not Found	Not Found	Not Found	Not Found	Not Found	Not Found	Not Found		15.5335	3
False	High	IsMasterProtein	TRINITY_DN6646_c0_g1_i1.p1	type:complete gc:universal TRINITY_DN6646_c0_g1_i1:819-256(-)	False	0	14.1157	19.2513	3	14	3	1	187	20.332	8.54	High	High	High	High	Not Found	Not Found	Not Found	Not Found	High	High	High	Not Found	Not Found	Not Found		25.4304	3
False	High	IsMasterProtein	TRINITY_DN6166_c0_g1_i1.p1	type:complete gc:universal TRINITY_DN6166_c0_g1_i1:2608-1430(-)	False	0	14.057	7.90816	3	14	3	1	392	44.633	9.04	High	High	Not Found	High	High	High	High	Not Found	High	High	High	Not Found	High	High		33.7328	3
False	High	IsMasterProtein	TRINITY_DN1401_c2_g1_i2.p1	type:complete gc:universal TRINITY_DN1401_c2_g1_i2:341-1726(+)	False	0	14.0339	8.67679	3	14	3	1	461	50.942	4.93	Not Found	Not Found	Not Found	Not Found	Not Found	High	Not Found	Not Found	Not Found	Not Found	High	High	Not Found	Not Found		16.0064	3
False	High	IsMasterProtein	TRINITY_DN6045_c0_g1_i3.p1	type:complete gc:universal TRINITY_DN6045_c0_g1_i3:3974-2031(-)	False	0	14.0086	12.0556	5	14	5	1	647	72.436	7.85	Not Found	Not Found	High	High	Not Found	Not Found	Not Found	Not Found	Not Found	Not Found	High	High	Not Found	Not Found		14.9679	5
False	High	IsMasterProtein	TRINITY_DN2932_c0_g1_i2.p1	type:complete gc:universal TRINITY_DN2932_c0_g1_i2:38-1405(+)	False	0	14.0015	9.67033	4	14	4	1	455	51.582	8.12	Not Found	Not Found	Not Found	Not Found	High	Not Found	Not Found	Not Found	Not Found	Not Found	High	High	Not Found	Not Found		17.5614	4
False	High	IsMasterProtein	TRINITY_DN33234_c0_g1_i1.p1	type:internal gc:universal TRINITY_DN33234_c0_g1_i1:1022-3(-)	False	0	13.8538	10.2941	4	14	1	1	340	38.84	8.5	Not Found	Not Found	High	High	High	High	High	High	Not Found	Not Found	High	High	Not Found	Not Found		29.7904	4
False	High	IsMasterProtein	TRINITY_DN545_c0_g1_i40.p1	type:complete gc:universal TRINITY_DN545_c0_g1_i40:109-5622(+)	False	0	13.8489	2.34077	4	14	4	1	1837	200.524	6.61	High	High	Not Found	Not Found	Not Found	Not Found	Not Found	Not Found	High	High	Not Found	Not Found	High	Not Found		26.4143	4
False	High	IsMasterProtein	TRINITY_DN1514_c0_g1_i2.p1	type:complete gc:universal TRINITY_DN1514_c0_g1_i2:1620-109(-)	False	0	13.7772	8.74751	4	14	2	1	503	56.743	5.77	Not Found	Not Found	High	High	Not Found	Not Found	High	High	Not Found	Not Found	Not Found	Not Found	Not Found	Not Found		30.9374	4
False	High	IsMasterProtein	TRINITY_DN1518_c0_g1_i11.p1	type:complete gc:universal TRINITY_DN1518_c0_g1_i11:185-1657(+)	False	0	13.7678	13.2653	6	14	6	1	490	55.189	6.6	Not Found	Not Found	High	High	High	High	High	High	Not Found	Not Found	Not Found	High	Not Found	Not Found		19.6108	6
False	High	IsMasterProtein	TRINITY_DN7000_c0_g1_i1.p1	type:5prime_partial gc:universal TRINITY_DN7000_c0_g1_i1:3250-1973(-)	False	0	13.7172	9.41176	4	13	4	1	425	47.445	6.86	High	High	High	High	High	High	High	High	High	High	High	High	High	High		45.8725	4
False	High	IsMasterProtein	TRINITY_DN56597_c0_g1_i1.p1	type:complete gc:universal TRINITY_DN56597_c0_g1_i1:2225-54(-)	False	0	13.6459	8.71369	5	13	5	1	723	79.832	5.38	Not Found	Not Found	High	High	Not Found	Not Found	High	High	Not Found	Not Found	High	High	Not Found	Not Found		21.514	5
False	High	IsMasterProtein	TRINITY_DN7055_c0_g1_i1.p1	type:complete gc:universal TRINITY_DN7055_c0_g1_i1:2029-650(-)	False	0	13.6417	11.5468	4	13	4	1	459	52.623	6.68	Not Found	Not Found	Not Found	Not Found	Not Found	High	Not Found	Not Found	Not Found	Not Found	High	High	Not Found	Not Found		17.9048	4
False	High	IsMasterProtein	TRINITY_DN5012_c0_g1_i1.p1	type:complete gc:universal TRINITY_DN5012_c0_g1_i1:147-1502(+)	False	0	13.5472	10.643	5	13	5	1	451	50.659	6.37	Not Found	Not Found	Not Found	Not Found	High	High	Not Found	Not Found	Not Found	Not Found	High	High	Not Found	Not Found		16.1126	5
False	High	IsMasterProtein	TRINITY_DN1170_c0_g2_i1.p1	type:complete gc:universal TRINITY_DN1170_c0_g2_i1:101-1177(+)	False	0	13.4512	10.3352	4	13	4	1	358	41.513	6.77	High	High	High	High	High	High	High	High	High	High	High	High	High	High		59.231	4
False	High	IsMasterProtein	Cont_Q9C075	Keratin, type I cytoskeletal 23 OS=Homo sapiens OX=9606 GN=KRT23 PE=1 SV=2	True	0	13.4432	11.3744	4	13	3	1	422	48.101	6.54	High	High	High	High	Not Found	Not Found	High	High	High	High	Not Found	High	Not Found	Not Found		38.6574	4
False	High	IsMasterProtein	TRINITY_DN560_c0_g1_i13.p1	type:complete gc:universal TRINITY_DN560_c0_g1_i13:2478-1789(-)	False	0	13.4138	8.29694	2	13	2	1	229	25.283	9.28	High	High	High	High	Not Found	Not Found	High	High	High	High	High	High	Not Found	High		50.2723	2
False	High	IsMasterProtein	TRINITY_DN94_c0_g2_i1.p1	type:complete gc:universal TRINITY_DN94_c0_g2_i1:3535-1934(-)	False	0	13.3867	7.50469	4	13	3	1	533	59.612	5.3	Not Found	Not Found	High	High	Not Found	Not Found	High	High	Not Found	Not Found	Not Found	Not Found	Not Found	Not Found		24.9902	4
False	High	IsMasterProtein	TRINITY_DN9162_c1_g1_i6.p1	type:complete gc:universal TRINITY_DN9162_c1_g1_i6:102-2909(+)	False	0	13.3659	5.34759	4	13	4	1	935	101.211	8.29	High	Not Found	Not Found	Not Found	Not Found	Not Found	Not Found	Not Found	High	High	Not Found	Not Found	High	High		16.2511	4
False	High	IsMasterProtein	TRINITY_DN9396_c0_g1_i1.p1	type:complete gc:universal TRINITY_DN9396_c0_g1_i1:2453-1035(-)	False	0	13.3211	9.11017	4	13	4	1	472	52.547	6.27	Not Found	Not Found	High	High	Not Found	High	Not Found	Not Found	Not Found	Not Found	High	High	Not Found	Not Found		16.9626	4
False	High	IsMasterProtein	TRINITY_DN573_c0_g1_i1.p1	type:complete gc:universal TRINITY_DN573_c0_g1_i1:2882-1416(-)	False	0	13.2869	11.8852	4	13	4	1	488	56.056	7.55	Not Found	Not Found	Not Found	Not Found	High	High	Not Found	Not Found	Not Found	Not Found	High	High	Not Found	Not Found		16.4477	4
False	High	IsMasterProtein	TRINITY_DN531_c0_g1_i10.p1	type:complete gc:universal TRINITY_DN531_c0_g1_i10:217-1734(+)	False	0	13.2781	10.8911	4	13	4	1	505	57.798	9.5	Not Found	Not Found	Not Found	Not Found	Not Found	Not Found	Not Found	Not Found	High	Not Found	High	High	Not Found	Not Found		9.5151	4
False	High	IsMasterProtein	TRINITY_DN4665_c0_g1_i2.p1	type:complete gc:universal TRINITY_DN4665_c0_g1_i2:1567-341(-)	False	0	13.2538	7.10784	3	13	3	1	408	46.746	8.25	Not Found	High	Not Found	Not Found	Not Found	High	Not Found	Not Found	High	High	High	High	High	High		21.3103	3
False	High	IsMasterProtein	TRINITY_DN256_c1_g1_i2.p1	type:complete gc:universal TRINITY_DN256_c1_g1_i2:249-1769(+)	False	0	13.2229	11.6601	5	13	5	1	506	56.836	6.24	Not Found	Not Found	High	Not Found	Not Found	Not Found	High	High	Not Found	Not Found	High	High	Not Found	Not Found		13.3434	5
False	High	IsMasterProtein	TRINITY_DN10_c0_g1_i14.p1	type:complete gc:universal TRINITY_DN10_c0_g1_i14:107-1264(+)	False	0	13.2013	10.9091	4	13	4	1	385	42.676	6.42	Not Found	Not Found	Not Found	Not Found	High	High	Not Found	Not Found	Not Found	Not Found	High	High	Not Found	Not Found		19.3901	4
False	High	IsMasterProtein	TRINITY_DN6316_c0_g1_i10.p1	type:internal gc:universal TRINITY_DN6316_c0_g1_i10:1-738(+)	False	0	13.1572	32.1138	5	13	5	1	246	26.729	7.01	Not Found	Not Found	High	High	Not Found	Not Found	High	High	Not Found	Not Found	Not Found	Not Found	Not Found	Not Found		17.166	5
False	High	IsMasterProtein	TRINITY_DN4355_c0_g1_i1.p1	type:complete gc:universal TRINITY_DN4355_c0_g1_i1:327-1886(+)	False	0	13.1248	9.24855	4	13	4	1	519	56.498	7.17	Not Found	Not Found	High	High	Not Found	Not Found	Not Found	Not Found	Not Found	Not Found	Not Found	Not Found	Not Found	Not Found		16.3021	4
False	High	IsMasterProtein	TRINITY_DN3909_c0_g1_i16.p1	type:internal gc:universal TRINITY_DN3909_c0_g1_i16:431-3(-)	False	0	13.0867	21.6783	4	13	1	1	143	16.332	5.49	Not Found	Not Found	High	Not Found	Not Found	Not Found	Not Found	Not Found	Not Found	Not Found	Not Found	Not Found	Not Found	Not Found		17.7319	4
False	High	IsMasterProtein	TRINITY_DN5761_c0_g1_i1.p1	type:complete gc:universal TRINITY_DN5761_c0_g1_i1:286-1962(+)	False	0	13.0208	8.60215	4	13	4	1	558	63.758	9.09	Not Found	Not Found	Not Found	Not Found	Not Found	Not Found	Not Found	Not Found	Not Found	Not Found	High	High	Not Found	Not Found		16.9547	4
False	High	IsMasterProtein	TRINITY_DN5407_c0_g1_i1.p1	type:complete gc:universal TRINITY_DN5407_c0_g1_i1:2481-1069(-)	False	0	13.0163	10	4	13	4	1	470	52.691	7.02	Not Found	Not Found	Not Found	Not Found	High	High	Not Found	Not Found	Not Found	Not Found	High	High	Not Found	Not Found		17.3039	4
False	High	IsMasterProtein	TRINITY_DN2689_c0_g1_i2.p1	type:complete gc:universal TRINITY_DN2689_c0_g1_i2:2117-705(-)	False	0	12.9796	7.23404	3	13	3	1	470	51.869	8.32	High	High	High	High	Not Found	High	High	High	High	High	High	High	High	High		64.0156	3
False	High	IsMasterProtein	TRINITY_DN1585_c1_g1_i3.p1	type:internal gc:universal TRINITY_DN1585_c1_g1_i3:3-314(+)	False	0	12.9765	26.9231	3	13	1	1	104	12.104	4.82	Not Found	Not Found	High	Not Found	Not Found	Not Found	Not Found	High	Not Found	Not Found	Not Found	Not Found	Not Found	Not Found		11.8007	3
False	High	IsMasterProtein	TRINITY_DN3029_c0_g1_i20.p1	type:complete gc:universal TRINITY_DN3029_c0_g1_i20:1891-407(-)	False	0	12.9242	9.31174	5	13	5	1	494	56.92	6.74	Not Found	Not Found	High	High	Not Found	Not Found	High	High	Not Found	Not Found	Not Found	Not Found	Not Found	Not Found		23.7474	5
False	High	IsMasterProtein	TRINITY_DN7388_c0_g1_i10.p1	type:3prime_partial gc:universal TRINITY_DN7388_c0_g1_i10:171-2774(+)	False	0	12.8473	5.18433	4	13	4	1	868	96.846	5.36	Not Found	Not Found	High	Not Found	High	High	Not Found	Not Found	Not Found	Not Found	High	High	Not Found	Not Found		5.94383	4
False	High	IsMasterProtein	TRINITY_DN13912_c0_g1_i1.p1	type:complete gc:universal TRINITY_DN13912_c0_g1_i1:2617-548(-)	False	0	12.752	8.27286	7	13	7	1	689	78.907	8.35	Not Found	Not Found	High	High	High	High	High	High	Not Found	Not Found	High	High	Not Found	Not Found		39.3351	7
False	High	IsMasterProtein	TRINITY_DN230_c0_g1_i11.p1	type:complete gc:universal TRINITY_DN230_c0_g1_i11:261-1856(+)	False	0	12.6612	7.53296	4	12	2	1	531	61.232	7.68	Not Found	Not Found	High	High	Not Found	Not Found	Not Found	Not Found	Not Found	Not Found	Not Found	Not Found	Not Found	Not Found		17.8446	4
False	High	IsMasterProtein	TRINITY_DN7481_c0_g1_i7.p1	type:complete gc:universal TRINITY_DN7481_c0_g1_i7:103-1956(+)	False	0	12.6545	4.86224	3	12	3	1	617	70.771	8.78	Not Found	Not Found	High	High	Not Found	Not Found	Not Found	Not Found	Not Found	Not Found	High	High	Not Found	Not Found		14.0804	3
False	High	IsMasterProtein	TRINITY_DN543_c0_g1_i10.p1	type:complete gc:universal TRINITY_DN543_c0_g1_i10:131-1678(+)	False	0	12.6365	9.12621	5	12	4	1	515	59.261	8.35	Not Found	Not Found	High	High	Not Found	Not Found	High	High	Not Found	Not Found	Not Found	Not Found	Not Found	Not Found		18.3874	5
False	High	IsMasterProtein	TRINITY_DN1792_c0_g1_i1.p1	type:complete gc:universal TRINITY_DN1792_c0_g1_i1:1687-167(-)	False	0	12.5329	7.11462	4	12	1	1	506	57.549	5.22	Not Found	Not Found	High	High	Not Found	Not Found	High	Not Found	Not Found	Not Found	Not Found	High	Not Found	Not Found		33.7722	4
False	High	IsMasterProtein	TRINITY_DN1585_c2_g1_i1.p1	type:5prime_partial gc:universal TRINITY_DN1585_c2_g1_i1:671-66(-)	False	0	12.466	17.4129	4	12	1	1	201	23.34	4.89	Not Found	Not Found	High	High	Not Found	Not Found	Not Found	Not Found	Not Found	Not Found	Not Found	Not Found	Not Found	Not Found		33.6211	4
False	High	IsMasterProtein	TRINITY_DN2347_c0_g1_i1.p1	type:complete gc:universal TRINITY_DN2347_c0_g1_i1:1716-199(-)	False	0	12.3779	5.94059	3	12	3	1	505	57.585	7.84	High	High	High	High	High	High	High	Not Found	High	High	High	High	High	High		36.2981	3
False	High	IsMasterProtein	TRINITY_DN2811_c0_g1_i1.p1	type:complete gc:universal TRINITY_DN2811_c0_g1_i1:2345-594(-)	False	0	12.3569	8.06175	3	12	3	1	583	66.847	8.47	Not Found	Not Found	High	High	Not Found	Not Found	High	High	Not Found	Not Found	High	High	Not Found	Not Found		21.2733	3
False	High	IsMasterProtein	TRINITY_DN5344_c0_g1_i6.p1	type:complete gc:universal TRINITY_DN5344_c0_g1_i6:3425-1131(-)	False	0	12.3437	5.10471	3	12	3	1	764	83.015	8.87	High	High	High	Not Found	High	Not Found	High	Not Found	High	Not Found	High	High	High	High		34.586	3
False	High	IsMasterProtein	TRINITY_DN2080_c0_g1_i13.p1	type:5prime_partial gc:universal TRINITY_DN2080_c0_g1_i13:2164-461(-)	False	0	12.302	10.2293	3	12	3	1	567	62.318	6.25	Not Found	Not Found	High	Not Found	High	High	Not Found	Not Found	High	High	High	High	Not Found	Not Found		22.6365	3
False	High	IsMasterProtein	TRINITY_DN187_c0_g1_i20.p1	type:complete gc:universal TRINITY_DN187_c0_g1_i20:3997-2003(-)	False	0	12.2803	4.96988	3	12	3	1	664	75.232	9.2	Not Found	Not Found	High	High	Not Found	Not Found	Not Found	Not Found	Not Found	Not Found	High	High	Not Found	Not Found		17.7818	3
False	High	IsMasterProtein	TRINITY_DN12705_c0_g1_i12.p1	type:5prime_partial gc:universal TRINITY_DN12705_c0_g1_i12:826-74(-)	False	0	12.2276	14	4	12	4	1	250	28.271	9.7	Not Found	Not Found	Not Found	Not Found	Not Found	Not Found	Not Found	Not Found	High	High	Not Found	Not Found	Not Found	High		15.2547	4
False	High	IsMasterProtein	TRINITY_DN2444_c1_g2_i5.p1	type:5prime_partial gc:universal TRINITY_DN2444_c1_g2_i5:4397-2700(-)	False	0	12.1918	7.07965	4	12	4	1	565	61.969	7.59	High	High	Not Found	Not Found	Not Found	Not Found	High	Not Found	High	High	Not Found	Not Found	Not Found	High		25.2316	4
False	High	IsMasterProtein	TRINITY_DN7539_c0_g1_i4.p1	type:complete gc:universal TRINITY_DN7539_c0_g1_i4:314-1006(+)	False	0	12.1697	10.8696	2	12	2	1	230	24.729	4.91	High	High	High	High	High	High	High	High	High	High	High	High	High	High		60.6706	2
False	High	IsMasterProtein	TRINITY_DN5297_c0_g1_i3.p1	type:complete gc:universal TRINITY_DN5297_c0_g1_i3:1799-264(-)	False	0	11.945	7.4364	4	11	3	1	511	59.881	4.88	Not Found	Not Found	High	High	Not Found	Not Found	High	High	Not Found	Not Found	Not Found	Not Found	Not Found	Not Found		20.6432	4
False	High	IsMasterProtein	TRINITY_DN41215_c0_g1_i1.p1	type:5prime_partial gc:universal TRINITY_DN41215_c0_g1_i1:780-190(-)	False	0	11.9022	6.63265	1	11	1	1	196	22.326	8.66	High	High	Not Found	Not Found	High	High	Not Found	Not Found	Not Found	Not Found	Not Found	Not Found	Not Found	Not Found		13.8136	1
False	High	IsMasterProtein	TRINITY_DN6171_c0_g1_i1.p1	type:5prime_partial gc:universal TRINITY_DN6171_c0_g1_i1:3271-1427(-)	False	0	11.8932	6.02606	4	11	4	1	614	71.376	6.9	High	High	High	High	High	High	Not Found	Not Found	High	High	High	High	High	High		37.2865	4
False	High	IsMasterProtein	TRINITY_DN2866_c0_g1_i6.p1	type:complete gc:universal TRINITY_DN2866_c0_g1_i6:6931-3827(-)	False	0	11.8599	4.64217	3	11	3	1	1034	116.643	7.61	Not Found	High	High	High	Not Found	Not Found	Not Found	Not Found	Not Found	Not Found	Not Found	High	Not Found	Not Found		18.56	3
False	High	IsMasterProtein	TRINITY_DN3635_c0_g2_i8.p1	type:complete gc:universal TRINITY_DN3635_c0_g2_i8:543-1901(+)	False	0	11.8128	9.51327	3	11	3	1	452	49.898	6.18	Not Found	Not Found	High	High	High	High	High	High	Not Found	Not Found	High	High	Not Found	Not Found		23.1322	3
False	High	IsMasterProtein	TRINITY_DN15061_c1_g1_i14.p1	type:complete gc:universal TRINITY_DN15061_c1_g1_i14:5744-696(-)	False	0	11.7701	3.21046	4	11	4	1	1682	189.697	7.62	High	High	Not Found	Not Found	Not Found	Not Found	Not Found	Not Found	Not Found	Not Found	Not Found	Not Found	High	Not Found		6.71282	4
False	High	IsMasterProtein	TRINITY_DN3544_c0_g1_i6.p1	type:complete gc:universal TRINITY_DN3544_c0_g1_i6:2224-218(-)	False	0	11.7511	5.98802	3	11	2	1	668	75.674	7.52	Not Found	Not Found	Not Found	Not Found	Not Found	Not Found	Not Found	Not Found	High	High	Not Found	Not Found	Not Found	Not Found		26.1666	3
False	High	IsMasterProtein	TRINITY_DN8421_c0_g1_i1.p1	type:complete gc:universal TRINITY_DN8421_c0_g1_i1:2624-2013(-)	False	0	11.6635	23.1527	3	11	3	1	203	22.452	5.27	High	High	Not Found	High	High	High	High	Not Found	Not Found	Not Found	Not Found	Not Found	Not Found	Not Found		15.6185	3
False	High	IsMasterProtein	TRINITY_DN3548_c0_g1_i1.p1	type:complete gc:universal TRINITY_DN3548_c0_g1_i1:2436-346(-)	False	0	11.6493	6.46552	4	11	4	1	696	80.827	5.36	Not Found	Not Found	Not Found	High	Not Found	Not Found	High	High	Not Found	Not Found	High	High	Not Found	Not Found		13.0195	4
False	High	IsMasterProtein	TRINITY_DN5820_c0_g1_i10.p1	type:complete gc:universal TRINITY_DN5820_c0_g1_i10:4163-2271(-)	False	0	11.5685	7.61905	5	11	5	1	630	72.231	7.42	Not Found	Not Found	High	High	High	Not Found	High	High	Not Found	Not Found	High	High	Not Found	Not Found		29.8869	5
False	High	IsMasterProtein	TRINITY_DN4229_c0_g1_i1.p1	type:complete gc:universal TRINITY_DN4229_c0_g1_i1:1848-919(-)	False	0	11.5168	14.2395	4	11	4	1	309	34.276	5.17	Not Found	Not Found	High	High	High	High	Not Found	High	Not Found	Not Found	High	High	Not Found	Not Found		37.0259	4
False	High	IsMasterProtein	TRINITY_DN18804_c0_g1_i1.p1	type:internal gc:universal TRINITY_DN18804_c0_g1_i1:1-945(+)	False	0	11.5085	11.4286	3	11	1	1	315	36.147	9.38	Not Found	Not Found	High	High	Not Found	Not Found	Not Found	Not Found	Not Found	Not Found	High	Not Found	Not Found	Not Found		15.0009	3
False	High	IsMasterProtein	TRINITY_DN408_c0_g1_i15.p1	type:complete gc:universal TRINITY_DN408_c0_g1_i15:47-1348(+)	False	0	11.4485	10.3926	4	11	4	1	433	47.886	7.81	Not Found	Not Found	Not Found	Not Found	Not Found	Not Found	Not Found	Not Found	Not Found	Not Found	High	High	Not Found	Not Found		14.4735	4
False	High	IsMasterProtein	TRINITY_DN5549_c0_g1_i11.p1	type:5prime_partial gc:universal TRINITY_DN5549_c0_g1_i11:2040-361(-)	False	0	11.4291	8.40787	4	11	1	1	559	62.629	5.58	Not Found	Not Found	High	High	Not Found	Not Found	Not Found	Not Found	Not Found	Not Found	Not Found	Not Found	Not Found	Not Found		15.8227	4
False	High	IsMasterProtein	TRINITY_DN644_c0_g1_i9.p1	type:complete gc:universal TRINITY_DN644_c0_g1_i9:102-1667(+)	False	0	11.3605	11.5163	4	11	4	1	521	58.295	7.65	Not Found	Not Found	High	High	Not Found	Not Found	High	High	Not Found	Not Found	Not Found	Not Found	Not Found	Not Found		27.3315	4
False	High	IsMasterProtein	TRINITY_DN6257_c0_g1_i4.p1	type:complete gc:universal TRINITY_DN6257_c0_g1_i4:3724-1178(-)	False	0	11.2737	6.95755	5	11	5	1	848	95.831	7.71	High	High	High	Not Found	Not Found	Not Found	High	High	High	High	Not Found	Not Found	High	Not Found		25.403	5
False	High	IsMasterProtein	TRINITY_DN2238_c0_g1_i19.p1	type:complete gc:universal TRINITY_DN2238_c0_g1_i19:462-2558(+)	False	0	11.2097	5.44413	4	11	4	1	698	79.289	8.15	High	High	Not Found	Not Found	High	Not Found	Not Found	Not Found	Not Found	High	Not Found	Not Found	High	Not Found		12.104	4
False	High	IsMasterProtein	TRINITY_DN358_c0_g1_i1.p1	type:complete gc:universal TRINITY_DN358_c0_g1_i1:1307-738(-)	False	0	11.2003	15.3439	3	11	3	1	189	22.163	8.09	High	High	High	High	High	High	High	High	High	High	High	Not Found	High	High		29.0035	3
False	High	IsMasterProtein	TRINITY_DN5549_c0_g1_i15.p1	type:5prime_partial gc:universal TRINITY_DN5549_c0_g1_i15:2626-1010(-)	False	0	11.1852	8.55019	4	11	1	1	538	59.625	5.36	Not Found	Not Found	Not Found	High	Not Found	Not Found	High	Not Found	Not Found	Not Found	Not Found	Not Found	Not Found	Not Found		18.7966	4
False	High	IsMasterProtein	TRINITY_DN1780_c0_g1_i11.p1	type:complete gc:universal TRINITY_DN1780_c0_g1_i11:8253-4117(-)	False	0	11.1742	3.33817	4	11	4	1	1378	155.499	5.52	High	High	Not Found	Not Found	Not Found	Not Found	High	High	High	High	Not Found	Not Found	Not Found	Not Found		4.47981	4
False	High	IsMasterProtein	TRINITY_DN56_c0_g1_i1.p1	type:5prime_partial gc:universal TRINITY_DN56_c0_g1_i1:1-1638(+)	False	0	11.1482	6.05505	3	11	3	1	545	59.612	5.69	Not Found	Not Found	High	High	High	High	High	High	Not Found	Not Found	High	High	Not Found	Not Found		28.9653	3
False	High	IsMasterProtein	TRINITY_DN1972_c0_g1_i8.p1	type:internal gc:universal TRINITY_DN1972_c0_g1_i8:1877-3(-)	False	0	11.1283	8	2	11	2	1	625	66.927	4.46	High	High	Not Found	High	Not Found	Not Found	High	High	High	High	Not Found	Not Found	High	High		31.814	2
False	High	IsMasterProtein	TRINITY_DN8717_c0_g1_i1.p1	type:3prime_partial gc:universal TRINITY_DN8717_c0_g1_i1:120-578(+)	False	0	11.1139	21.5686	3	11	1	1	153	18.284	7.97	Not Found	Not Found	Not Found	High	Not Found	Not Found	Not Found	Not Found	Not Found	Not Found	High	High	Not Found	Not Found		20.904	3
False	High	IsMasterProtein	TRINITY_DN2683_c0_g1_i10.p1	type:complete gc:universal TRINITY_DN2683_c0_g1_i10:1765-890(-)	False	0	11.0869	6.87285	2	11	2	1	291	32.238	5.14	High	High	Not Found	Not Found	High	High	High	Not Found	High	High	High	High	High	High		41.841	2
False	High	IsMasterProtein	TRINITY_DN3980_c0_g1_i1.p1	type:complete gc:universal TRINITY_DN3980_c0_g1_i1:956-303(-)	False	0	11.0843	19.8157	4	11	4	1	217	24.727	6.23	Not Found	High	High	High	Not Found	High	High	Not Found	High	High	High	Not Found	Not Found	Not Found		20.807	4
False	High	IsMasterProtein	TRINITY_DN1835_c0_g1_i10.p1	type:complete gc:universal TRINITY_DN1835_c0_g1_i10:109-3117(+)	False	0	11.0802	3.29341	3	11	3	1	1002	114.251	6.34	Not Found	Not Found	Not Found	Not Found	Not Found	Not Found	Not Found	Not Found	High	High	Not Found	Not Found	Not Found	Not Found		4.8325	3
False	High	IsMasterProtein	TRINITY_DN1727_c0_g1_i1.p1	type:5prime_partial gc:universal TRINITY_DN1727_c0_g1_i1:1-2181(+)	False	0	11.0354	5.92287	4	11	4	1	726	83.204	7.02	Not Found	Not Found	High	Not Found	Not Found	Not Found	Not Found	Not Found	Not Found	Not Found	Not Found	High	Not Found	Not Found		10.7744	4
False	High	IsMasterProtein	TRINITY_DN282_c0_g1_i1.p1	type:complete gc:universal TRINITY_DN282_c0_g1_i1:135-1865(+)	False	0	11.0321	6.59722	4	11	4	1	576	64.478	4.86	Not Found	Not Found	High	High	High	High	Not Found	Not Found	Not Found	Not Found	High	High	Not Found	Not Found		33.0321	4
False	High	IsMasterProtein	TRINITY_DN5934_c0_g1_i1.p1	type:complete gc:universal TRINITY_DN5934_c0_g1_i1:298-4098(+)	False	0	11.0219	4.42338	4	10	4	1	1266	141.785	6.51	High	High	Not Found	Not Found	Not Found	High	Not Found	Not Found	High	Not Found	High	High	Not Found	Not Found		18.0266	4
False	High	IsMasterProtein	TRINITY_DN8720_c0_g1_i1.p1	type:complete gc:universal TRINITY_DN8720_c0_g1_i1:876-1934(+)	False	0	11.007	7.67045	2	10	2	1	352	40.47	8.88	High	High	Not Found	High	Not Found	Not Found	Not Found	Not Found	High	High	High	Not Found	High	High		8.57133	2
False	High	IsMasterProtein	TRINITY_DN3381_c0_g1_i15.p1	type:complete gc:universal TRINITY_DN3381_c0_g1_i15:5835-3475(-)	False	0	10.9984	5.34351	3	10	3	1	786	84.37	5.2	Not Found	High	High	Not Found	Not Found	Not Found	High	Not Found	High	High	Not Found	Not Found	High	High		29.7724	3
False	High	IsMasterProtein	TRINITY_DN25358_c0_g1_i5.p1	type:complete gc:universal TRINITY_DN25358_c0_g1_i5:1982-204(-)	False	0	10.9919	8.78378	4	10	4	1	592	65.527	7.53	Not Found	Not Found	High	High	Not Found	Not Found	High	High	Not Found	Not Found	Not Found	Not Found	Not Found	Not Found		18.913	4
False	High	IsMasterProtein	TRINITY_DN10542_c0_g1_i1.p1	type:complete gc:universal TRINITY_DN10542_c0_g1_i1:1602-52(-)	False	0	10.8992	11.0465	6	10	6	1	516	56.92	7.71	High	High	High	Not Found	High	Not Found	High	High	High	High	High	Not Found	High	High		27.4255	6
False	High	IsMasterProtein	TRINITY_DN4642_c0_g1_i1.p1	type:complete gc:universal TRINITY_DN4642_c0_g1_i1:92-643(+)	False	0	10.8852	20.765	4	10	4	1	183	20.817	11.8	Not Found	Not Found	High	High	Not Found	Not Found	Not Found	Not Found	High	High	Not Found	High	High	High		26.15	4
False	High	IsMasterProtein	TRINITY_DN1849_c0_g1_i1.p1	type:complete gc:universal TRINITY_DN1849_c0_g1_i1:1959-442(-)	False	0	10.8764	6.93069	3	10	2	1	505	57.852	7.96	Not Found	Not Found	High	High	Not Found	Not Found	Not Found	Not Found	Not Found	Not Found	Not Found	Not Found	High	High		18.1627	3
False	High	IsMasterProtein	TRINITY_DN719_c0_g1_i1.p1	type:complete gc:universal TRINITY_DN719_c0_g1_i1:327-2420(+)	False	0	10.8418	7.03013	4	10	4	1	697	78.454	7.69	Not Found	Not Found	High	High	Not Found	Not Found	Not Found	Not Found	Not Found	High	High	High	Not Found	Not Found		11.9459	4
False	High	IsMasterProtein	TRINITY_DN2824_c0_g1_i2.p1	type:complete gc:universal TRINITY_DN2824_c0_g1_i2:67-1692(+)	False	0	10.8112	8.31793	4	10	4	1	541	60.689	6.84	Not Found	Not Found	High	High	Not Found	Not Found	High	Not Found	Not Found	Not Found	Not Found	Not Found	Not Found	Not Found		6.34187	4
False	High	IsMasterProtein	TRINITY_DN6816_c0_g1_i7.p1	type:complete gc:universal TRINITY_DN6816_c0_g1_i7:4090-2477(-)	False	0	10.7531	6.33147	4	10	4	1	537	60.576	8.24	Not Found	Not Found	High	High	High	High	High	High	Not Found	Not Found	High	High	Not Found	Not Found		32.8836	4
False	High	IsMasterProtein	TRINITY_DN17398_c0_g2_i1.p1	type:internal gc:universal TRINITY_DN17398_c0_g2_i1:800-3(-)	False	0	10.6754	4.13534	1	10	1	1	266	30.938	5.53	Not Found	Not Found	High	High	Not Found	Not Found	Not Found	Not Found	Not Found	Not Found	Not Found	Not Found	Not Found	Not Found		10.8282	1
False	High	IsMasterProtein	TRINITY_DN1937_c0_g1_i3.p1	type:complete gc:universal TRINITY_DN1937_c0_g1_i3:2755-1367(-)	False	0	10.6114	8.00866	3	10	3	1	462	52.388	6.46	Not Found	Not Found	High	Not Found	Not Found	Not Found	High	High	Not Found	Not Found	Not Found	Not Found	Not Found	Not Found		7.07971	3
False	High	IsMasterProtein	TRINITY_DN7917_c0_g1_i1.p1	type:5prime_partial gc:universal TRINITY_DN7917_c0_g1_i1:1533-235(-)	False	0	10.5356	7.63889	4	10	3	1	432	49.626	6.01	Not Found	Not Found	Not Found	Not Found	High	High	Not Found	Not Found	Not Found	Not Found	High	Not Found	Not Found	Not Found		9.99461	4
False	High	IsMasterProtein	TRINITY_DN33590_c0_g1_i2.p1	type:5prime_partial gc:universal TRINITY_DN33590_c0_g1_i2:385-26(-)	False	0	10.4995	26.8908	2	10	1	1	119	13.896	4.37	Not Found	Not Found	Not Found	High	Not Found	Not Found	Not Found	Not Found	Not Found	Not Found	High	High	Not Found	Not Found		18.845	2
False	High	IsMasterProtein	Cont_Q62168	Keratin, type I cuticular Ha2 OS=Mus musculus OX=10090 GN=Krt32 PE=1 SV=2	True	0	10.474	7.12531	3	10	1	1	407	46.392	4.82	Not Found	Not Found	Not Found	Not Found	Not Found	Not Found	Not Found	Not Found	High	Not Found	Not Found	Not Found	Not Found	Not Found		70.9312	3
False	High	IsMasterProtein	TRINITY_DN45_c0_g1_i30.p1	type:complete gc:universal TRINITY_DN45_c0_g1_i30:174-3554(+)	False	0	10.4064	3.37478	3	10	3	1	1126	123.049	6.27	Not Found	Not Found	High	High	High	High	High	High	High	High	High	High	Not Found	High		37.4353	3
False	High	IsMasterProtein	TRINITY_DN25917_c0_g1_i1.p1	type:complete gc:universal TRINITY_DN25917_c0_g1_i1:329-979(+)	False	0	10.3796	12.037	4	10	4	1	216	24.552	8.82	High	High	High	High	High	High	High	High	High	High	High	High	High	High		41.8619	4
False	High	IsMasterProtein	TRINITY_DN2891_c0_g1_i3.p2	type:complete gc:universal TRINITY_DN2891_c0_g1_i3:3439-2018(-)	False	0	10.3786	9.51374	3	10	3	1	473	52.725	7.34	Not Found	Not Found	Not Found	Not Found	Not Found	Not Found	Not Found	Not Found	Not Found	Not Found	High	High	Not Found	Not Found		15.682	3
False	High	IsMasterProtein	TRINITY_DN13060_c0_g1_i20.p1	type:complete gc:universal TRINITY_DN13060_c0_g1_i20:5656-2087(-)	False	0	10.3051	3.53238	3	10	3	1	1189	133.179	5.81	High	High	Not Found	Not Found	Not Found	Not Found	Not Found	Not Found	High	Not Found	Not Found	Not Found	High	Not Found		11.9382	3
False	High	IsMasterProtein	TRINITY_DN3987_c0_g1_i1.p1	type:complete gc:universal TRINITY_DN3987_c0_g1_i1:3594-2506(-)	False	0	10.1946	9.11602	3	10	3	1	362	41.858	9.19	High	High	Not Found	Not Found	Not Found	Not Found	Not Found	Not Found	High	High	Not Found	High	High	High		21.6418	3
False	High	IsMasterProtein	TRINITY_DN277_c0_g1_i14.p1	type:complete gc:universal TRINITY_DN277_c0_g1_i14:148-1710(+)	False	0	10.1441	6.53846	3	10	3	1	520	56.982	7.11	High	High	Not Found	Not Found	Not Found	Not Found	Not Found	High	High	High	Not Found	Not Found	High	High		30.9753	3
False	High	IsMasterProtein	TRINITY_DN2078_c0_g1_i11.p1	type:complete gc:universal TRINITY_DN2078_c0_g1_i11:6092-4584(-)	False	0	10.1403	6.57371	2	10	2	1	502	54.856	6.18	Not Found	Not Found	Not Found	Not Found	Not Found	High	High	High	High	Not Found	High	Not Found	High	High		19.4584	2
False	High	IsMasterProtein	TRINITY_DN15172_c0_g1_i17.p1	type:complete gc:universal TRINITY_DN15172_c0_g1_i17:1861-749(-)	False	0	10.0997	7.56757	3	10	3	1	370	43.724	9.17	High	High	Not Found	Not Found	Not Found	Not Found	Not Found	Not Found	High	High	Not Found	Not Found	Not Found	High		19.7599	3
False	High	IsMasterProtein	TRINITY_DN3574_c0_g1_i1.p1	type:complete gc:universal TRINITY_DN3574_c0_g1_i1:76-1611(+)	False	0	10.0865	5.87084	3	9	1	1	511	59.197	5	Not Found	Not Found	Not Found	Not Found	Not Found	Not Found	Not Found	High	Not Found	Not Found	Not Found	Not Found	Not Found	Not Found		12.566	3
False	High	IsMasterProtein	TRINITY_DN1151_c0_g1_i3.p1	type:3prime_partial gc:universal TRINITY_DN1151_c0_g1_i3:730-2(-)	False	0	10.0863	11.9342	2	9	2	1	243	26.216	5.33	Not Found	Not Found	Not Found	Not Found	High	Not Found	Not Found	Not Found	Not Found	Not Found	High	High	Not Found	Not Found		16.0367	2
False	High	IsMasterProtein	TRINITY_DN3116_c0_g1_i10.p1	type:complete gc:universal TRINITY_DN3116_c0_g1_i10:126-698(+)	False	0	10.0775	8.94737	2	9	2	1	190	21.14	6.11	High	High	High	High	Not Found	High	High	High	High	High	High	High	High	High	Acetyl [N-Term]	25.1248	2
False	High	IsMasterProtein	TRINITY_DN6026_c0_g1_i4.p1	type:complete gc:universal TRINITY_DN6026_c0_g1_i4:1215-127(-)	False	0	10.0714	7.45856	3	9	3	1	362	43.096	9.52	High	High	Not Found	Not Found	Not Found	Not Found	Not Found	Not Found	High	High	Not Found	Not Found	High	High		30.2054	3
False	High	IsMasterProtein	TRINITY_DN5716_c0_g2_i1.p1	type:3prime_partial gc:universal TRINITY_DN5716_c0_g2_i1:57-2381(+)	False	0	9.98716	3.74194	3	9	3	1	775	86.802	6.51	High	High	High	High	High	High	Not Found	High	Not Found	Not Found	Not Found	Not Found	Not Found	Not Found		18.1213	3
False	High	IsMasterProtein	TRINITY_DN5303_c0_g1_i8.p1	type:complete gc:universal TRINITY_DN5303_c0_g1_i8:2509-1271(-)	False	0	9.96523	6.79612	2	9	2	1	412	47.952	5.73	Not Found	Not Found	Not Found	Not Found	High	High	Not Found	Not Found	Not Found	Not Found	High	High	Not Found	Not Found		16.5976	2
False	High	IsMasterProtein	TRINITY_DN742_c0_g1_i59.p1	type:5prime_partial gc:universal TRINITY_DN742_c0_g1_i59:2-3031(+)	False	0	9.85124	3.56789	4	9	4	1	1009	110.827	7.56	High	High	High	High	Not Found	Not Found	High	High	High	High	Not Found	Not Found	High	High		29.0252	4
False	High	IsMasterProtein	TRINITY_DN4803_c0_g1_i1.p1	type:complete gc:universal TRINITY_DN4803_c0_g1_i1:3603-2452(-)	False	0	9.84238	4.43864	2	9	2	1	383	44.611	9.11	Not Found	Not Found	Not Found	Not Found	Not Found	Not Found	Not Found	Not Found	High	High	Not Found	Not Found	Not Found	High		10.6716	2
False	High	IsMasterProtein	TRINITY_DN10842_c0_g1_i2.p1	type:5prime_partial gc:universal TRINITY_DN10842_c0_g1_i2:3-380(+)	False	0	9.74922	21.6	3	9	1	1	125	14.556	7.24	Not Found	Not Found	High	High	Not Found	Not Found	Not Found	High	Not Found	Not Found	Not Found	Not Found	Not Found	Not Found		25.8178	3
False	High	IsMasterProtein	TRINITY_DN10260_c3_g1_i2.p1	type:complete gc:universal TRINITY_DN10260_c3_g1_i2:2127-499(-)	False	0	9.74462	6.45756	4	9	4	1	542	61.584	8.24	Not Found	Not Found	High	High	Not Found	High	High	High	Not Found	Not Found	Not Found	High	Not Found	Not Found		12.4344	4
False	High	IsMasterProtein	TRINITY_DN4509_c0_g1_i1.p1	type:complete gc:universal TRINITY_DN4509_c0_g1_i1:1630-422(-)	False	0	9.73377	7.46269	3	9	3	1	402	46.06	8.05	Not Found	Not Found	High	Not Found	High	High	Not Found	Not Found	Not Found	Not Found	High	Not Found	Not Found	Not Found		11.9443	3
False	High	IsMasterProtein	TRINITY_DN2875_c0_g1_i1.p1	type:complete gc:universal TRINITY_DN2875_c0_g1_i1:1143-520(-)	False	0	9.68165	11.5942	2	9	2	1	207	23.407	5.59	High	High	High	High	High	Not Found	Not Found	Not Found	High	High	High	High	Not Found	Not Found		20.254	2
False	High	IsMasterProtein	TRINITY_DN6445_c0_g2_i1.p1	type:complete gc:universal TRINITY_DN6445_c0_g2_i1:280-1788(+)	False	0	9.65973	6.1753	3	9	3	1	502	55.487	8.69	High	High	High	High	Not Found	Not Found	Not Found	Not Found	Not Found	High	Not Found	Not Found	High	High		22.25	3
False	High	IsMasterProtein	TRINITY_DN69218_c0_g1_i1.p1	type:internal gc:universal TRINITY_DN69218_c0_g1_i1:3-626(+)	False	0	9.65309	10.0962	2	9	1	1	208	21.906	8.4	High	High	High	High	High	High	High	High	Not Found	Not Found	High	High	Not Found	Not Found		40.2331	2
False	High	IsMasterProtein	TRINITY_DN958_c0_g1_i10.p1	type:complete gc:universal TRINITY_DN958_c0_g1_i10:1995-376(-)	False	0	9.64504	6.12245	3	9	3	1	539	62.348	6.1	Not Found	Not Found	High	High	Not Found	Not Found	High	High	Not Found	Not Found	Not Found	Not Found	Not Found	Not Found		19.9879	3
False	High	IsMasterProtein	TRINITY_DN1585_c1_g1_i15.p1	type:5prime_partial gc:universal TRINITY_DN1585_c1_g1_i15:2-1360(+)	False	0	9.6098	7.9646	4	9	1	1	452	51.431	5.05	Not Found	Not Found	Not Found	High	Not Found	Not Found	Not Found	Not Found	Not Found	Not Found	Not Found	Not Found	Not Found	Not Found		50.9587	4
False	High	IsMasterProtein	TRINITY_DN5658_c0_g1_i1.p1	type:complete gc:universal TRINITY_DN5658_c0_g1_i1:121-1848(+)	False	0	9.60369	3.30435	2	9	2	1	575	65.121	7.34	Not Found	Not Found	High	High	Not Found	High	High	High	Not Found	Not Found	High	Not Found	Not Found	Not Found		11.4276	2
False	High	IsMasterProtein	TRINITY_DN373_c0_g1_i10.p1	type:complete gc:universal TRINITY_DN373_c0_g1_i10:1863-511(-)	False	0	9.60327	6.22222	2	9	2	1	450	51.455	6.64	Not Found	Not Found	Not Found	Not Found	Not Found	Not Found	Not Found	Not Found	Not Found	Not Found	High	High	Not Found	Not Found		7.8476	2
False	High	IsMasterProtein	TRINITY_DN1585_c0_g2_i2.p1	type:internal gc:universal TRINITY_DN1585_c0_g2_i2:566-3(-)	False	0	9.59832	14.8936	3	9	1	1	188	21.378	5.35	Not Found	Not Found	High	High	Not Found	Not Found	High	High	Not Found	Not Found	Not Found	Not Found	Not Found	Not Found		30.8779	3
False	High	IsMasterProtein	TRINITY_DN4140_c0_g1_i11.p1	type:5prime_partial gc:universal TRINITY_DN4140_c0_g1_i11:6606-1495(-)	False	0	9.56504	1.58544	2	9	2	1	1703	188.849	5.22	High	High	Not Found	Not Found	Not Found	Not Found	Not Found	Not Found	High	Not Found	Not Found	Not Found	High	High		15.8854	2
False	High	IsMasterProtein	TRINITY_DN2200_c0_g1_i2.p1	type:complete gc:universal TRINITY_DN2200_c0_g1_i2:1540-641(-)	False	0	9.55977	8.3612	2	9	2	1	299	31.92	7.2	High	Not Found	High	Not Found	Not Found	Not Found	Not Found	Not Found	High	Not Found	High	High	High	Not Found		23.6714	2
False	High	IsMasterProtein	Cont_Q9NSB2	Keratin, type II cuticular Hb4 OS=Homo sapiens OX=9606 GN=KRT84 PE=2 SV=2	True	0	9.55208	4.33333	4	9	1	1	600	64.801	7.56	High	High	Not Found	Not Found	Not Found	Not Found	Not Found	Not Found	Not Found	Not Found	Not Found	Not Found	Not Found	Not Found		35.1137	4
False	High	IsMasterProtein	TRINITY_DN17407_c0_g1_i1.p1	type:complete gc:universal TRINITY_DN17407_c0_g1_i1:2065-1517(-)	False	0	9.50273	17.033	2	9	2	1	182	20.723	6.58	High	High	Not Found	Not Found	Not Found	Not Found	Not Found	Not Found	High	Not Found	Not Found	Not Found	Not Found	Not Found		9.36452	2
False	High	IsMasterProtein	TRINITY_DN13108_c0_g1_i6.p1	type:complete gc:universal TRINITY_DN13108_c0_g1_i6:38-1144(+)	False	0	9.49984	9.51087	3	9	3	1	368	40.524	4.86	Not Found	Not Found	High	High	Not Found	Not Found	High	High	Not Found	Not Found	Not Found	Not Found	Not Found	Not Found		11.8642	3
False	High	IsMasterProtein	TRINITY_DN3868_c0_g1_i1.p1	type:complete gc:universal TRINITY_DN3868_c0_g1_i1:1369-53(-)	False	0	9.45834	6.621	3	9	1	1	438	49.954	5.5	Not Found	Not Found	Not Found	Not Found	High	Not Found	Not Found	Not Found	Not Found	Not Found	High	Not Found	Not Found	Not Found		10.5281	3
False	High	IsMasterProtein	TRINITY_DN3697_c0_g1_i10.p1	type:complete gc:universal TRINITY_DN3697_c0_g1_i10:238-1596(+)	False	0	9.45173	11.2832	5	9	5	1	452	49.922	8.59	Not Found	Not Found	Not Found	Not Found	Not Found	Not Found	Not Found	Not Found	Not Found	Not Found	High	High	Not Found	Not Found		17.453	5
False	High	IsMasterProtein	TRINITY_DN6843_c0_g1_i2.p1	type:complete gc:universal TRINITY_DN6843_c0_g1_i2:1762-275(-)	False	0	9.44901	4.44444	2	9	2	1	495	57.676	9.01	High	High	Not Found	Not Found	Not Found	Not Found	Not Found	Not Found	High	High	High	High	High	High		22.7713	2
False	High	IsMasterProtein	TRINITY_DN14009_c0_g1_i7.p1	type:complete gc:universal TRINITY_DN14009_c0_g1_i7:1446-241(-)	False	0	9.41396	11.2219	5	9	5	1	401	45.391	8.7	Not Found	High	High	Not Found	High	High	High	High	High	Not Found	High	High	Not Found	Not Found		13.2483	5
False	High	IsMasterProtein	TRINITY_DN8648_c0_g1_i2.p1	type:complete gc:universal TRINITY_DN8648_c0_g1_i2:162-1064(+)	False	0	9.41155	11.3333	4	9	4	1	300	34.233	9.45	High	High	Not Found	Not Found	Not Found	Not Found	Not Found	Not Found	High	High	High	Not Found	High	Not Found		16.372	4
False	High	IsMasterProtein	TRINITY_DN3894_c0_g1_i1.p1	type:complete gc:universal TRINITY_DN3894_c0_g1_i1:7253-159(-)	False	0	9.40158	1.56514	4	9	4	1	2364	275.629	9	Not Found	Not Found	High	High	Not Found	Not Found	High	High	Not Found	Not Found	Not Found	Not Found	Not Found	Not Found		18.3094	4
False	High	IsMasterProtein	TRINITY_DN2082_c0_g1_i3.p1	type:complete gc:universal TRINITY_DN2082_c0_g1_i3:1598-42(-)	False	0	9.37948	5.40541	3	9	2	1	518	59.512	8.46	Not Found	Not Found	High	High	High	High	High	High	Not Found	Not Found	High	Not Found	Not Found	Not Found		43.4043	3
False	High	IsMasterProtein	TRINITY_DN1848_c0_g1_i2.p1	type:complete gc:universal TRINITY_DN1848_c0_g1_i2:214-1542(+)	False	0	9.34587	8.1448	3	9	3	1	442	51.164	7.58	Not Found	Not Found	Not Found	Not Found	Not Found	Not Found	Not Found	Not Found	Not Found	Not Found	High	High	Not Found	Not Found		9.71069	3
False	High	IsMasterProtein	TRINITY_DN1078_c0_g3_i2.p1	type:5prime_partial gc:universal TRINITY_DN1078_c0_g3_i2:3543-2326(-)	False	0	9.34312	5.18519	2	9	2	1	405	44.755	5.86	Not Found	Not Found	High	High	Not Found	Not Found	High	High	Not Found	Not Found	Not Found	Not Found	Not Found	Not Found		10.7953	2
False	High	IsMasterProtein	TRINITY_DN6696_c0_g1_i2.p2	type:complete gc:universal TRINITY_DN6696_c0_g1_i2:681-331(-)	False	0	9.28748	15.5172	2	9	2	1	116	12.423	4.48	High	High	High	High	Not Found	Not Found	High	High	Not Found	High	High	High	Not Found	Not Found		34.0586	2
False	High	IsMasterProtein	TRINITY_DN184_c0_g1_i13.p1	type:complete gc:universal TRINITY_DN184_c0_g1_i13:1708-110(-)	False	0	9.26193	6.20301	3	9	2	1	532	58.972	8.18	High	High	High	High	Not Found	High	Not Found	Not Found	High	High	High	High	Not Found	Not Found		29.4131	3
False	High	IsMasterProtein	TRINITY_DN7150_c0_g1_i1.p2	type:complete gc:universal TRINITY_DN7150_c0_g1_i1:2366-75(-)	False	0	9.23999	4.32503	4	9	4	1	763	89.763	8.75	High	High	High	Not Found	Not Found	High	Not Found	Not Found	High	Not Found	High	High	High	Not Found		15.3253	4
False	High	IsMasterProtein	Cont_Q5E9B1	L-lactate dehydrogenase B chain OS=Bos taurus OX=9913 GN=LDHB PE=2 SV=4	True	0	9.20807	9.58084	2	8	2	1	334	36.7	6.44	High	High	Not Found	Not Found	High	Not Found	High	High	Not Found	Not Found	Not Found	Not Found	Not Found	Not Found		13.4279	2
False	High	IsMasterProtein	TRINITY_DN3428_c0_g1_i11.p1	type:internal gc:universal TRINITY_DN3428_c0_g1_i11:1194-1(-)	False	0	9.18262	7.53769	3	8	2	1	398	44.614	8.82	Not Found	Not Found	High	High	High	High	High	High	Not Found	Not Found	High	High	Not Found	Not Found		27.7525	3
False	High	IsMasterProtein	TRINITY_DN1025_c0_g1_i14.p1	type:complete gc:universal TRINITY_DN1025_c0_g1_i14:132-1874(+)	False	0	9.17738	6.55172	3	8	3	1	580	63.189	6.68	Not Found	Not Found	High	High	High	High	High	High	Not Found	Not Found	High	Not Found	Not Found	Not Found		19.4927	3
False	High	IsMasterProtein	TRINITY_DN8013_c0_g1_i1.p1	type:complete gc:universal TRINITY_DN8013_c0_g1_i1:176-1618(+)	False	0	9.11893	8.125	3	8	3	1	480	52.875	7.81	Not Found	Not Found	High	High	Not Found	Not Found	Not Found	Not Found	Not Found	Not Found	Not Found	Not Found	Not Found	Not Found		13.1959	3
False	High	IsMasterProtein	TRINITY_DN24541_c0_g1_i3.p1	type:complete gc:universal TRINITY_DN24541_c0_g1_i3:183-1667(+)	False	0	9.10606	6.68016	3	8	3	1	494	54.762	8.32	High	High	Not Found	Not Found	High	High	High	High	High	High	Not Found	Not Found	Not Found	Not Found		25.543	3
False	High	IsMasterProtein	TRINITY_DN4471_c0_g1_i2.p1	type:complete gc:universal TRINITY_DN4471_c0_g1_i2:435-4910(+)	False	0	9.07086	2.01207	3	8	3	1	1491	166.512	4.78	Not Found	Not Found	Not Found	Not Found	High	High	Not Found	Not Found	Not Found	Not Found	High	High	Not Found	Not Found		9.13335	3
False	High	IsMasterProtein	TRINITY_DN6691_c0_g1_i1.p1	type:complete gc:universal TRINITY_DN6691_c0_g1_i1:188-1930(+)	False	0	9.07061	6.2069	3	8	3	1	580	65.763	6.9	Not Found	Not Found	High	High	Not Found	High	High	High	Not Found	Not Found	Not Found	Not Found	Not Found	Not Found		19.768	3
False	High	IsMasterProtein	TRINITY_DN4214_c0_g1_i1.p1	type:5prime_partial gc:universal TRINITY_DN4214_c0_g1_i1:3585-1102(-)	False	0	9.06784	3.99033	3	8	3	1	827	85.317	5.85	Not Found	Not Found	Not Found	Not Found	Not Found	Not Found	Not Found	Not Found	High	High	High	High	High	High		16.0925	3
False	High	IsMasterProtein	TRINITY_DN1082_c0_g1_i15.p1	type:complete gc:universal TRINITY_DN1082_c0_g1_i15:4283-2154(-)	False	0	9.02524	5.07757	3	8	3	1	709	79.858	8.92	Not Found	Not Found	High	High	Not Found	Not Found	Not Found	Not Found	High	Not Found	High	High	Not Found	Not Found		16.271	3
False	High	IsMasterProtein	TRINITY_DN6695_c0_g1_i18.p1	type:complete gc:universal TRINITY_DN6695_c0_g1_i18:10189-4019(-)	False	0	9.02311	1.79961	3	8	3	1	2056	225.998	6.73	Not Found	Not Found	Not Found	Not Found	High	High	Not Found	Not Found	Not Found	Not Found	High	High	Not Found	Not Found		14.4105	3
False	High	IsMasterProtein	TRINITY_DN784_c0_g1_i2.p1	type:complete gc:universal TRINITY_DN784_c0_g1_i2:3217-803(-)	False	0	8.96934	2.98507	2	8	2	1	804	89.422	5.54	Not Found	Not Found	Not Found	Not Found	High	High	Not Found	Not Found	Not Found	Not Found	High	High	Not Found	Not Found		7.55035	2
False	High	IsMasterProtein	TRINITY_DN116_c0_g1_i1.p1	type:complete gc:universal TRINITY_DN116_c0_g1_i1:478-1824(+)	False	0	8.95199	10.9375	4	8	4	1	448	51.637	7.68	Not Found	Not Found	High	High	Not Found	High	Not Found	High	Not Found	Not Found	Not Found	Not Found	Not Found	Not Found		12.1625	4
False	High	IsMasterProtein	TRINITY_DN24209_c0_g2_i1.p1	type:complete gc:universal TRINITY_DN24209_c0_g2_i1:325-1992(+)	False	0	8.92824	3.78378	2	8	2	1	555	61.922	5.95	Not Found	Not Found	High	High	High	High	High	High	High	Not Found	Not Found	Not Found	Not Found	Not Found		24.1901	2
False	High	IsMasterProtein	Cont_P00883	Fructose-bisphosphate aldolase A OS=Oryctolagus cuniculus OX=9986 GN=ALDOA PE=1 SV=2	True	0	8.90066	11.2637	3	8	3	1	364	39.318	8.09	High	Not Found	High	High	Not Found	High	High	High	Not Found	Not Found	Not Found	High	Not Found	Not Found		10.136	3
False	High	IsMasterProtein	TRINITY_DN6052_c0_g1_i6.p1	type:complete gc:universal TRINITY_DN6052_c0_g1_i6:2099-1437(-)	False	0	8.88685	10	2	8	2	1	220	24.613	7.36	High	Not Found	High	High	Not Found	Not Found	Not Found	High	High	High	Not Found	Not Found	Not Found	Not Found		16.7714	2
False	High	IsMasterProtein	TRINITY_DN217_c0_g1_i18.p1	type:complete gc:universal TRINITY_DN217_c0_g1_i18:7207-3215(-)	False	0	8.87943	2.40602	3	8	3	1	1330	149.05	8.12	Not Found	High	Not Found	Not Found	Not Found	Not Found	Not Found	Not Found	High	High	Not Found	Not Found	High	Not Found		5.63846	3
False	High	IsMasterProtein	TRINITY_DN4932_c0_g1_i6.p1	type:complete gc:universal TRINITY_DN4932_c0_g1_i6:951-52(-)	False	0	8.87356	8.3612	2	8	2	1	299	34.186	9.91	Not Found	Not Found	High	Not Found	Not Found	High	Not Found	Not Found	High	High	Not Found	Not Found	Not Found	High		9.06205	2
False	High	IsMasterProtein	TRINITY_DN14771_c0_g1_i14.p1	type:complete gc:universal TRINITY_DN14771_c0_g1_i14:1006-266(-)	False	0	8.85612	12.1951	3	8	3	1	246	28.366	4.67	Not Found	Not Found	Not Found	Not Found	Not Found	Not Found	Not Found	Not Found	High	High	Not Found	High	Not Found	Not Found		9.20418	3
False	High	IsMasterProtein	TRINITY_DN3534_c1_g2_i1.p1	type:complete gc:universal TRINITY_DN3534_c1_g2_i1:129-2114(+)	False	0	8.85249	5.44629	3	8	3	1	661	73.685	8.9	Not Found	Not Found	Not Found	Not Found	Not Found	Not Found	Not Found	Not Found	Not Found	Not Found	High	High	Not Found	Not Found		9.29434	3
False	High	IsMasterProtein	TRINITY_DN9775_c0_g2_i1.p1	type:complete gc:universal TRINITY_DN9775_c0_g2_i1:1781-165(-)	False	0	8.81596	6.3197	3	8	3	1	538	60.808	7.71	High	Not Found	Not Found	Not Found	Not Found	Not Found	High	High	Not Found	Not Found	Not Found	High	Not Found	Not Found		11.8886	3
False	High	IsMasterProtein	TRINITY_DN3941_c0_g1_i2.p1	type:complete gc:universal TRINITY_DN3941_c0_g1_i2:3135-232(-)	False	0	8.80595	3.61944	3	8	3	1	967	107.386	6.18	Not Found	Not Found	Not Found	Not Found	Not Found	High	Not Found	Not Found	Not Found	Not Found	High	High	Not Found	Not Found		14.4038	3
False	High	IsMasterProtein	TRINITY_DN1024_c0_g1_i4.p1	type:complete gc:universal TRINITY_DN1024_c0_g1_i4:1357-458(-)	False	0	8.80042	9.36455	2	8	2	1	299	33.113	4.42	Not Found	Not Found	Not Found	High	Not Found	High	High	High	High	Not Found	Not Found	High	Not Found	Not Found		20.0989	2
False	High	IsMasterProtein	TRINITY_DN355_c0_g1_i1.p1	type:complete gc:universal TRINITY_DN355_c0_g1_i1:192-1802(+)	False	0	8.77032	4.10448	1	8	1	1	536	57.7	6.44	High	Not Found	High	High	Not Found	Not Found	Not Found	Not Found	Not Found	Not Found	Not Found	Not Found	Not Found	Not Found		9.46513	1
False	High	IsMasterProtein	TRINITY_DN3468_c0_g3_i1.p1	type:complete gc:universal TRINITY_DN3468_c0_g3_i1:145-1422(+)	False	0	8.75141	8.23529	3	8	3	1	425	47.347	11.62	Not Found	Not Found	Not Found	Not Found	Not Found	Not Found	Not Found	Not Found	Not Found	Not Found	High	High	Not Found	Not Found		9.94264	3
False	High	IsMasterProtein	TRINITY_DN12613_c0_g1_i2.p1	type:complete gc:universal TRINITY_DN12613_c0_g1_i2:161-1273(+)	False	0	8.71422	5.13514	1	8	1	1	370	41.113	5.87	High	High	High	High	Not Found	Not Found	High	Not Found	Not Found	High	Not Found	Not Found	High	High		26.1882	1
False	High	IsMasterProtein	TRINITY_DN4306_c0_g1_i1.p1	type:complete gc:universal TRINITY_DN4306_c0_g1_i1:120-2075(+)	False	0	8.68678	3.99386	2	8	2	1	651	74.516	8.7	Not Found	Not Found	High	High	Not Found	Not Found	High	Not Found	High	Not Found	Not Found	Not Found	Not Found	Not Found		9.7385	2
False	High	IsMasterProtein	TRINITY_DN2773_c0_g1_i1.p1	type:3prime_partial gc:universal TRINITY_DN2773_c0_g1_i1:1752-1(-)	False	0	8.64331	5.82192	3	8	3	1	584	65.115	6.13	Not Found	Not Found	Not Found	Not Found	Not Found	Not Found	Not Found	Not Found	Not Found	Not Found	High	High	Not Found	Not Found		4.02525	3
False	High	IsMasterProtein	TRINITY_DN10159_c0_g1_i1.p1	type:5prime_partial gc:universal TRINITY_DN10159_c0_g1_i1:2847-1222(-)	False	0	8.62965	3.8817	2	8	2	1	541	61.598	7.12	Not Found	Not Found	Not Found	High	High	Not Found	High	High	Not Found	Not Found	Not Found	High	Not Found	Not Found		14.5793	2
False	High	IsMasterProtein	TRINITY_DN190_c2_g1_i1.p1	type:complete gc:universal TRINITY_DN190_c2_g1_i1:1685-1080(-)	False	0	8.60005	13.4328	2	8	2	1	201	22.702	9.39	Not Found	High	Not Found	Not Found	Not Found	Not Found	Not Found	Not Found	High	Not Found	Not Found	Not Found	High	Not Found		6.61941	2
False	High	IsMasterProtein	TRINITY_DN2806_c0_g1_i1.p1	type:5prime_partial gc:universal TRINITY_DN2806_c0_g1_i1:1752-481(-)	False	0	8.59876	8.03783	3	8	3	1	423	48.648	9.44	Not Found	Not Found	High	High	Not Found	Not Found	Not Found	Not Found	Not Found	Not Found	Not Found	High	Not Found	Not Found		7.42537	3
False	High	IsMasterProtein	TRINITY_DN2309_c1_g1_i4.p1	type:3prime_partial gc:universal TRINITY_DN2309_c1_g1_i4:157-891(+)	False	0	8.5958	8.57143	2	8	2	1	245	26.842	8.53	High	High	High	High	High	High	High	High	High	High	High	High	High	High		60.6435	2
False	High	IsMasterProtein	TRINITY_DN5469_c0_g2_i1.p1	type:3prime_partial gc:universal TRINITY_DN5469_c0_g2_i1:51-1610(+)	False	0	8.58557	7.30769	3	8	3	1	520	58.511	6.95	Not Found	Not Found	Not Found	Not Found	High	High	Not Found	Not Found	Not Found	Not Found	High	High	Not Found	Not Found		6.85446	3
False	High	IsMasterProtein	TRINITY_DN4562_c0_g1_i4.p1	type:complete gc:universal TRINITY_DN4562_c0_g1_i4:804-64(-)	False	0	8.58177	13.0081	3	7	3	1	246	27.663	8.5	High	High	Not Found	Not Found	High	Not Found	High	Not Found	High	High	High	High	Not Found	Not Found		18.6955	3
False	High	IsMasterProtein	TRINITY_DN1943_c0_g1_i1.p1	type:complete gc:universal TRINITY_DN1943_c0_g1_i1:3786-2773(-)	False	0	8.5656	10.9792	3	7	3	1	337	37.967	8.78	High	High	Not Found	Not Found	Not Found	Not Found	Not Found	Not Found	High	High	Not Found	Not Found	High	High		19.1147	3
False	High	IsMasterProtein	TRINITY_DN4136_c0_g1_i10.p1	type:complete gc:universal TRINITY_DN4136_c0_g1_i10:3178-1283(-)	False	0	8.48345	3.32805	2	7	2	1	631	68.725	8.54	Not Found	Not Found	Not Found	Not Found	Not Found	Not Found	High	High	Not Found	Not Found	Not Found	Not Found	Not Found	Not Found		9.40615	2
False	High	IsMasterProtein	TRINITY_DN3349_c0_g1_i3.p1	type:complete gc:universal TRINITY_DN3349_c0_g1_i3:5548-2717(-)	False	0	8.4602	3.07529	3	7	3	1	943	102.667	9.04	Not Found	Not Found	Not Found	Not Found	High	High	Not Found	Not Found	Not Found	Not Found	High	High	Not Found	Not Found		15.3666	3
False	High	IsMasterProtein	TRINITY_DN429_c0_g1_i3.p1	type:complete gc:universal TRINITY_DN429_c0_g1_i3:1729-902(-)	False	0	8.41438	9.81818	2	7	2	1	275	30.353	9.17	High	High	Not Found	High	High	Not Found	High	High	High	High	High	High	Not Found	High	Acetyl [N-Term]	32.1829	2
False	High	IsMasterProtein	TRINITY_DN1550_c0_g1_i3.p1	type:5prime_partial gc:universal TRINITY_DN1550_c0_g1_i3:3-1625(+)	False	0	8.3727	4.07407	2	7	2	1	540	58.495	4.32	Not Found	Not Found	High	Not Found	Not Found	Not Found	High	Not Found	High	High	Not Found	Not Found	Not Found	Not Found		8.72258	2
False	High	IsMasterProtein	TRINITY_DN3930_c0_g1_i5.p1	type:complete gc:universal TRINITY_DN3930_c0_g1_i5:102-2063(+)	False	0	8.34513	4.44104	3	7	3	1	653	75.968	6.38	Not Found	Not Found	Not Found	Not Found	High	Not Found	High	High	Not Found	Not Found	Not Found	Not Found	Not Found	Not Found		9.62151	3
False	High	IsMasterProtein	TRINITY_DN9395_c0_g1_i4.p1	type:5prime_partial gc:universal TRINITY_DN9395_c0_g1_i4:1695-550(-)	False	0	8.33445	7.34908	2	7	2	1	381	42.948	9.45	High	High	High	High	Not Found	Not Found	High	High	High	High	High	High	High	High		28.0192	2
False	High	IsMasterProtein	TRINITY_DN9397_c0_g1_i1.p1	type:complete gc:universal TRINITY_DN9397_c0_g1_i1:102-1565(+)	False	0	8.30574	9.24025	4	7	4	1	487	54.12	6.84	Not Found	Not Found	High	Not Found	Not Found	Not Found	High	High	Not Found	Not Found	Not Found	Not Found	Not Found	Not Found		8.9011	4
False	High	IsMasterProtein	TRINITY_DN1088_c0_g1_i11.p1	type:complete gc:universal TRINITY_DN1088_c0_g1_i11:4331-1053(-)	False	0	8.29706	2.9304	2	7	2	1	1092	121.872	4.83	Not Found	Not Found	Not Found	Not Found	Not Found	Not Found	Not Found	Not Found	Not Found	Not Found	High	High	Not Found	Not Found		8.60294	2
False	High	IsMasterProtein	TRINITY_DN260_c0_g1_i12.p1	type:complete gc:universal TRINITY_DN260_c0_g1_i12:274-4275(+)	False	0	8.28865	2.32558	3	7	3	1	1333	146.614	7.33	High	High	High	High	High	Not Found	Not Found	Not Found	High	High	High	High	High	Not Found		24.749	3
False	High	IsMasterProtein	TRINITY_DN17551_c0_g1_i1.p1	type:5prime_partial gc:universal TRINITY_DN17551_c0_g1_i1:1527-88(-)	False	0	8.28079	3.75783	2	7	2	1	479	54.246	5.43	Not Found	Not Found	Not Found	Not Found	Not Found	Not Found	Not Found	Not Found	Not Found	Not Found	High	High	Not Found	Not Found		13.6188	2
False	High	IsMasterProtein	TRINITY_DN13249_c0_g1_i10.p1	type:complete gc:universal TRINITY_DN13249_c0_g1_i10:1925-453(-)	False	0	8.18762	6.12245	3	7	3	1	490	56.032	8.95	Not Found	Not Found	Not Found	Not Found	Not Found	High	Not Found	High	Not Found	Not Found	High	High	Not Found	Not Found		7.48531	3
False	High	IsMasterProtein	TRINITY_DN10811_c0_g1_i7.p1	type:complete gc:universal TRINITY_DN10811_c0_g1_i7:3841-476(-)	False	0	8.14583	3.47904	3	7	3	1	1121	127.9	6.84	Not Found	Not Found	Not Found	Not Found	Not Found	Not Found	Not Found	Not Found	High	High	Not Found	Not Found	Not Found	Not Found		10.5679	3
False	High	IsMasterProtein	TRINITY_DN29_c0_g1_i4.p1	type:5prime_partial gc:universal TRINITY_DN29_c0_g1_i4:1-1503(+)	False	0	8.13073	4.8	2	7	2	1	500	54.935	8.59	Not Found	High	Not Found	Not Found	Not Found	Not Found	Not Found	Not Found	High	High	Not Found	Not Found	High	High		15.2152	2
False	High	IsMasterProtein	TRINITY_DN538_c0_g1_i2.p1	type:complete gc:universal TRINITY_DN538_c0_g1_i2:104-778(+)	False	0	8.07365	16.0714	3	7	3	1	224	24.882	5.17	Not Found	High	Not Found	Not Found	Not Found	High	Not Found	Not Found	High	High	High	High	Not Found	High		16.8602	3
False	High	IsMasterProtein	TRINITY_DN257_c0_g1_i2.p1	type:complete gc:universal TRINITY_DN257_c0_g1_i2:150-1592(+)	False	0	8.0024	5.20833	3	7	3	1	480	53.111	7.56	High	High	Not Found	Not Found	Not Found	Not Found	Not Found	Not Found	High	High	Not Found	Not Found	High	High		10.5743	3
False	High	IsMasterProtein	TRINITY_DN6434_c0_g1_i13.p1	type:complete gc:universal TRINITY_DN6434_c0_g1_i13:227-1693(+)	False	0	7.90195	3.68852	2	7	2	1	488	55.166	5.92	Not Found	Not Found	Not Found	Not Found	High	High	Not Found	Not Found	Not Found	Not Found	High	High	Not Found	Not Found		12.1	2
False	High	IsMasterProtein	TRINITY_DN8672_c0_g1_i1.p1	type:complete gc:universal TRINITY_DN8672_c0_g1_i1:81-1754(+)	False	0	7.8915	7.54039	3	7	3	1	557	62.518	7.3	Not Found	Not Found	High	High	Not Found	Not Found	High	High	Not Found	Not Found	Not Found	Not Found	Not Found	Not Found		16.4065	3
False	High	IsMasterProtein	TRINITY_DN2089_c0_g1_i6.p1	type:internal gc:universal TRINITY_DN2089_c0_g1_i6:3-3743(+)	False	0	7.84143	2.72654	3	7	3	1	1247	136.748	6.28	Not Found	High	Not Found	Not Found	Not Found	High	Not Found	Not Found	High	Not Found	High	High	High	Not Found		11.5051	3
False	High	IsMasterProtein	TRINITY_DN14018_c1_g1_i9.p1	type:3prime_partial gc:universal TRINITY_DN14018_c1_g1_i9:380-3013(+)	False	0	7.8347	2.2779	2	7	2	1	878	103.02	7.24	Not Found	Not Found	High	High	Not Found	Not Found	Not Found	Not Found	Not Found	Not Found	Not Found	Not Found	Not Found	Not Found		5.13219	2
False	High	IsMasterProtein	TRINITY_DN606_c0_g1_i1.p1	type:complete gc:universal TRINITY_DN606_c0_g1_i1:1745-132(-)	False	0	7.7679	5.58659	3	7	3	1	537	60.857	8.27	High	Not Found	High	High	High	High	High	Not Found	Not Found	Not Found	High	High	High	Not Found		7.35355	3
False	High	IsMasterProtein	TRINITY_DN12488_c0_g1_i1.p1	type:complete gc:universal TRINITY_DN12488_c0_g1_i1:466-2973(+)	False	0	7.74615	2.87425	2	7	2	1	835	92.33	6.89	Not Found	Not Found	High	High	High	Not Found	High	Not Found	Not Found	Not Found	High	Not Found	Not Found	Not Found		12.2205	2
False	High	IsMasterProtein	TRINITY_DN483_c0_g1_i1.p1	type:complete gc:universal TRINITY_DN483_c0_g1_i1:1936-362(-)	False	0	7.67797	5.15267	2	7	2	1	524	58.474	8.46	Not Found	Not Found	High	High	Not Found	Not Found	High	High	Not Found	Not Found	Not Found	Not Found	Not Found	Not Found		17.0861	2
False	High	IsMasterProtein	TRINITY_DN2424_c0_g1_i10.p1	type:complete gc:universal TRINITY_DN2424_c0_g1_i10:1567-320(-)	False	0	7.64308	7.46988	3	7	3	1	415	48.181	8.5	High	High	Not Found	Not Found	Not Found	Not Found	Not Found	Not Found	Not Found	High	High	Not Found	High	High		13.3606	3
False	High	IsMasterProtein	TRINITY_DN3865_c0_g1_i1.p1	type:complete gc:universal TRINITY_DN3865_c0_g1_i1:309-1925(+)	False	0	7.63676	3.71747	2	7	2	1	538	59.59	7.2	Not Found	Not Found	High	High	Not Found	Not Found	High	High	Not Found	Not Found	High	High	Not Found	Not Found		19.2985	2
False	High	IsMasterProtein	TRINITY_DN782_c0_g1_i1.p1	type:complete gc:universal TRINITY_DN782_c0_g1_i1:166-4068(+)	False	0	7.63311	2.61538	3	7	3	1	1300	140.49	6.81	High	High	Not Found	Not Found	Not Found	Not Found	Not Found	Not Found	High	High	Not Found	Not Found	High	High		14.5472	3
False	High	IsMasterProtein	TRINITY_DN770_c0_g1_i2.p1	type:5prime_partial gc:universal TRINITY_DN770_c0_g1_i2:2097-373(-)	False	0	7.58723	5.57491	2	7	2	1	574	63.761	6.99	Not Found	Not Found	High	High	Not Found	Not Found	Not Found	Not Found	Not Found	Not Found	Not Found	High	Not Found	Not Found		13.1527	2
False	High	IsMasterProtein	TRINITY_DN7703_c0_g1_i2.p1	type:3prime_partial gc:universal TRINITY_DN7703_c0_g1_i2:176-2206(+)	False	0	7.4829	3.54505	3	7	3	1	677	73.468	6.09	High	Not Found	High	High	Not Found	High	High	High	High	High	High	High	High	Not Found		19.0777	3
False	High	IsMasterProtein	TRINITY_DN4518_c0_g1_i10.p1	type:complete gc:universal TRINITY_DN4518_c0_g1_i10:152-1465(+)	False	0	7.46831	5.49199	2	7	2	1	437	48.36	7.66	Not Found	Not Found	Not Found	Not Found	High	Not Found	Not Found	Not Found	Not Found	Not Found	High	High	Not Found	Not Found		11.2951	2
False	High	IsMasterProtein	TRINITY_DN877_c0_g1_i2.p1	type:complete gc:universal TRINITY_DN877_c0_g1_i2:3681-109(-)	False	0	7.46592	1.76471	2	7	2	1	1190	133.432	6.25	High	High	Not Found	Not Found	Not Found	Not Found	Not Found	Not Found	High	Not Found	Not Found	Not Found	High	Not Found		12.0664	2
False	High	IsMasterProtein	TRINITY_DN97_c2_g1_i2.p1	type:complete gc:universal TRINITY_DN97_c2_g1_i2:244-1314(+)	False	0	7.42694	4.77528	2	7	2	1	356	39.441	9.28	Not Found	High	Not Found	Not Found	Not Found	Not Found	Not Found	Not Found	High	High	Not Found	Not Found	High	High	Acetyl [N-Term]	12.4068	2
False	High	IsMasterProtein	TRINITY_DN11835_c0_g1_i1.p1	type:complete gc:universal TRINITY_DN11835_c0_g1_i1:1397-171(-)	False	0	7.37438	3.18627	1	7	1	1	408	46	6.8	Not Found	Not Found	High	High	High	Not Found	Not Found	High	Not Found	High	High	High	Not Found	High		15.73	1
False	High	IsMasterProtein	TRINITY_DN4644_c0_g1_i15.p1	type:5prime_partial gc:universal TRINITY_DN4644_c0_g1_i15:3-1538(+)	False	0	7.34308	4.10959	2	6	2	1	511	57.176	5.15	Not Found	High	High	High	High	High	High	High	Not Found	Not Found	High	High	Not Found	Not Found		32.5978	2
False	High	IsMasterProtein	TRINITY_DN4068_c0_g1_i1.p1	type:complete gc:universal TRINITY_DN4068_c0_g1_i1:103-2037(+)	False	0	7.33456	4.96894	2	6	2	1	644	71.103	9.48	Not Found	High	High	High	Not Found	Not Found	High	Not Found	Not Found	High	High	High	Not Found	High		25.5559	2
False	High	IsMasterProtein	TRINITY_DN2644_c0_g1_i1.p1	type:complete gc:universal TRINITY_DN2644_c0_g1_i1:230-1618(+)	False	0	7.31131	4.11255	2	6	2	1	462	51.918	8.94	High	High	Not Found	Not Found	High	High	Not Found	Not Found	High	High	Not Found	Not Found	High	High		18.9523	2
False	High	IsMasterProtein	TRINITY_DN1945_c0_g1_i6.p1	type:3prime_partial gc:universal TRINITY_DN1945_c0_g1_i6:1100-3(-)	False	0	7.29874	5.19126	2	6	2	1	366	40.618	5.62	Not Found	Not Found	High	High	High	Not Found	Not Found	Not Found	Not Found	Not Found	Not Found	High	Not Found	Not Found		18.4639	2
False	High	IsMasterProtein	TRINITY_DN1813_c0_g1_i10.p1	type:complete gc:universal TRINITY_DN1813_c0_g1_i10:1189-494(-)	False	0	7.28739	9.09091	2	6	2	1	231	26.386	6.38	Not Found	Not Found	High	Not Found	High	High	High	High	Not Found	Not Found	High	High	High	High		16.8108	2
False	High	IsMasterProtein	TRINITY_DN4188_c0_g1_i10.p1	type:complete gc:universal TRINITY_DN4188_c0_g1_i10:1954-128(-)	False	0	7.21449	3.45395	2	6	2	1	608	69.173	7.11	Not Found	Not Found	Not Found	High	Not Found	Not Found	High	High	Not Found	Not Found	High	High	Not Found	Not Found		9.79609	2
False	High	IsMasterProtein	TRINITY_DN15081_c0_g1_i1.p1	type:5prime_partial gc:universal TRINITY_DN15081_c0_g1_i1:499-77(-)	False	0	7.20031	9.28571	1	6	1	1	140	15.359	8.46	High	High	Not Found	Not Found	High	High	Not Found	Not Found	High	High	Not Found	High	High	Not Found		18.438	1
False	High	IsMasterProtein	TRINITY_DN3858_c0_g1_i10.p2	type:complete gc:universal TRINITY_DN3858_c0_g1_i10:2153-1014(-)	False	0	7.17276	8.70712	3	6	3	1	379	42.07	7.02	Not Found	Not Found	Not Found	Not Found	Not Found	Not Found	Not Found	Not Found	Not Found	Not Found	High	High	Not Found	Not Found		9.93585	3
False	High	IsMasterProtein	TRINITY_DN761_c0_g1_i8.p1	type:complete gc:universal TRINITY_DN761_c0_g1_i8:4307-1536(-)	False	0	7.13508	2.8169	2	6	2	1	923	99.86	6.77	Not Found	Not Found	High	High	High	High	Not Found	Not Found	Not Found	Not Found	High	Not Found	Not Found	Not Found		11.8991	2
False	High	IsMasterProtein	TRINITY_DN63418_c0_g1_i1.p1	type:5prime_partial gc:universal TRINITY_DN63418_c0_g1_i1:668-18(-)	False	0	7.12436	6.94444	1	6	1	1	216	24.786	10.8	High	Not Found	Not Found	Not Found	Not Found	Not Found	Not Found	Not Found	Not Found	Not Found	Not Found	Not Found	Not Found	Not Found		3.89376	1
False	High	IsMasterProtein	TRINITY_DN2656_c0_g1_i3.p1	type:complete gc:universal TRINITY_DN2656_c0_g1_i3:2127-820(-)	False	0	7.11956	2.98851	1	6	1	1	435	48.937	7.72	Not Found	Not Found	High	Not Found	Not Found	Not Found	Not Found	Not Found	Not Found	Not Found	High	High	Not Found	Not Found		10.7911	1
False	High	IsMasterProtein	TRINITY_DN2582_c0_g2_i1.p1	type:complete gc:universal TRINITY_DN2582_c0_g2_i1:775-113(-)	False	0	7.11351	5	1	6	1	1	220	23.699	7.02	High	High	High	High	High	High	High	High	High	High	High	High	High	High		40.0028	1
False	High	IsMasterProtein	TRINITY_DN419_c0_g1_i1.p1	type:complete gc:universal TRINITY_DN419_c0_g1_i1:1363-887(-)	False	0	7.09088	13.2911	2	6	2	1	158	17.54	4.61	Not Found	Not Found	High	Not Found	High	Not Found	Not Found	Not Found	Not Found	Not Found	High	High	Not Found	Not Found		14.1361	2
False	High	IsMasterProtein	TRINITY_DN2764_c0_g1_i4.p1	type:complete gc:universal TRINITY_DN2764_c0_g1_i4:2886-1183(-)	False	0	7.06485	3.35097	2	6	2	1	567	62.236	8.03	Not Found	High	Not Found	High	Not Found	Not Found	High	High	Not Found	High	Not Found	Not Found	Not Found	Not Found		12.4972	2
False	High	IsMasterProtein	TRINITY_DN6640_c0_g1_i1.p1	type:complete gc:universal TRINITY_DN6640_c0_g1_i1:153-476(+)	False	0	7.02165	21.4953	2	6	2	1	107	12.537	9.95	High	High	Not Found	High	Not Found	Not Found	High	High	High	Not Found	Not Found	Not Found	High	High		16.6034	2
False	High	IsMasterProtein	TRINITY_DN12414_c0_g2_i3.p1	type:5prime_partial gc:universal TRINITY_DN12414_c0_g2_i3:1810-71(-)	False	0	7.00965	5.00864	2	6	2	1	579	65.699	7.85	Not Found	Not Found	Not Found	Not Found	Not Found	High	High	High	Not Found	Not Found	High	High	Not Found	Not Found		13.8572	2
False	High	IsMasterProtein	TRINITY_DN29_c1_g1_i1.p1	type:internal gc:universal TRINITY_DN29_c1_g1_i1:762-1(-)	False	0	6.98632	7.08661	1	6	1	1	254	27.508	7.81	High	High	High	High	High	Not Found	Not Found	High	High	High	High	High	Not Found	Not Found		21.3757	1
False	High	IsMasterProtein	TRINITY_DN23530_c0_g1_i1.p1	type:internal gc:universal TRINITY_DN23530_c0_g1_i1:1-309(+)	False	0	6.92468	21.3592	3	6	1	1	103	11.812	6.04	Not Found	Not Found	High	High	Not Found	Not Found	Not Found	Not Found	Not Found	Not Found	Not Found	Not Found	Not Found	Not Found		31.864	3
False	High	IsMasterProtein	TRINITY_DN920_c0_g1_i1.p1	type:complete gc:universal TRINITY_DN920_c0_g1_i1:102-995(+)	False	0	6.91527	9.09091	3	6	3	1	297	34.223	6.27	High	Not Found	High	Not Found	Not Found	Not Found	Not Found	High	High	High	High	High	High	High		25.2022	3
False	High	IsMasterProtein	TRINITY_DN5255_c0_g1_i1.p1	type:complete gc:universal TRINITY_DN5255_c0_g1_i1:122-1639(+)	False	0	6.90988	5.14851	3	6	3	1	505	55.589	8.53	High	High	Not Found	Not Found	Not Found	Not Found	Not Found	Not Found	High	High	Not Found	Not Found	High	High		10.2035	3
False	High	IsMasterProtein	TRINITY_DN3383_c0_g1_i7.p1	type:complete gc:universal TRINITY_DN3383_c0_g1_i7:2062-191(-)	False	0	6.90193	4.49438	3	6	3	1	623	71.369	5.97	Not Found	Not Found	High	High	Not Found	Not Found	Not Found	High	Not Found	Not Found	High	High	Not Found	Not Found		7.29482	3
False	High	IsMasterProtein	TRINITY_DN1762_c0_g1_i10.p1	type:complete gc:universal TRINITY_DN1762_c0_g1_i10:108-1190(+)	False	0	6.89243	5.27778	2	6	2	1	360	41.633	8.38	High	High	High	Not Found	High	Not Found	Not Found	High	High	High	High	High	High	High		22.929	2
False	High	IsMasterProtein	TRINITY_DN343_c0_g1_i1.p1	type:complete gc:universal TRINITY_DN343_c0_g1_i1:3336-2143(-)	False	0	6.89007	8.81612	3	6	3	1	397	45.692	6.67	Not Found	Not Found	High	High	Not Found	Not Found	High	High	Not Found	Not Found	Not Found	Not Found	Not Found	Not Found		8.74287	3
False	High	IsMasterProtein	TRINITY_DN7604_c0_g1_i2.p1	type:3prime_partial gc:universal TRINITY_DN7604_c0_g1_i2:5519-3(-)	False	0	6.85647	1.95759	3	6	3	1	1839	203.6	5.55	High	High	Not Found	Not Found	Not Found	Not Found	Not Found	Not Found	Not Found	Not Found	Not Found	Not Found	High	Not Found		11.8618	3
False	High	IsMasterProtein	TRINITY_DN2775_c0_g1_i7.p1	type:complete gc:universal TRINITY_DN2775_c0_g1_i7:1968-769(-)	False	0	6.80096	6.51629	2	6	2	1	399	44.582	5.19	Not Found	Not Found	High	High	Not Found	Not Found	High	High	Not Found	Not Found	High	High	Not Found	Not Found		21.2046	2
False	High	IsMasterProtein	TRINITY_DN1574_c0_g1_i10.p1	type:5prime_partial gc:universal TRINITY_DN1574_c0_g1_i10:3-1340(+)	False	0	6.78556	4.49438	2	6	2	1	445	51.388	5.38	Not Found	Not Found	High	High	Not Found	Not Found	High	High	Not Found	Not Found	High	High	Not Found	Not Found		16.8662	2
False	High	IsMasterProtein	TRINITY_DN1972_c0_g1_i7.p1	type:complete gc:universal TRINITY_DN1972_c0_g1_i7:3935-96(-)	False	0	6.76213	2.50195	3	6	3	1	1279	141.332	4.53	Not Found	High	High	Not Found	Not Found	High	High	High	High	High	Not Found	Not Found	Not Found	Not Found		15.994	3
False	High	IsMasterProtein	TRINITY_DN4662_c0_g1_i2.p1	type:complete gc:universal TRINITY_DN4662_c0_g1_i2:165-3443(+)	False	0	6.7139	2.28938	2	6	2	1	1092	123.359	5.45	Not Found	Not Found	Not Found	Not Found	Not Found	Not Found	High	Not Found	High	High	Not Found	Not Found	Not Found	Not Found		4.10011	2
False	High	IsMasterProtein	TRINITY_DN555_c0_g1_i14.p1	type:5prime_partial gc:universal TRINITY_DN555_c0_g1_i14:1730-135(-)	False	0	6.70216	8.85122	3	6	3	1	531	63.854	3.9	Not Found	Not Found	Not Found	Not Found	High	High	Not Found	Not Found	Not Found	Not Found	High	High	Not Found	Not Found		6.97184	3
False	High	IsMasterProtein	TRINITY_DN3675_c0_g1_i2.p1	type:complete gc:universal TRINITY_DN3675_c0_g1_i2:53-1405(+)	False	0	6.68623	4	2	6	2	1	450	48.251	7.36	High	High	Not Found	Not Found	Not Found	High	High	High	Not Found	High	Not Found	Not Found	Not Found	Not Found		16.9068	2
False	High	IsMasterProtein	TRINITY_DN14641_c0_g1_i1.p1	type:5prime_partial gc:universal TRINITY_DN14641_c0_g1_i1:1900-239(-)	False	0	6.68392	5.60579	2	6	2	1	553	62.574	5.45	Not Found	Not Found	High	High	Not Found	Not Found	Not Found	Not Found	Not Found	Not Found	Not Found	High	Not Found	Not Found		5.65894	2
False	High	IsMasterProtein	TRINITY_DN10315_c0_g1_i1.p1	type:complete gc:universal TRINITY_DN10315_c0_g1_i1:252-1769(+)	False	0	6.66296	2.17822	2	6	2	1	505	56.666	6.71	Not Found	Not Found	High	Not Found	Not Found	Not Found	Not Found	Not Found	Not Found	Not Found	High	Not Found	Not Found	Not Found		4.2614	2
False	High	IsMasterProtein	TRINITY_DN822_c0_g1_i6.p2	type:complete gc:universal TRINITY_DN822_c0_g1_i6:1240-653(-)	False	0	6.63007	9.74359	2	6	1	1	195	21.87	6.2	High	High	High	High	High	High	High	High	High	High	Not Found	Not Found	Not Found	Not Found		36.2843	2
False	High	IsMasterProtein	TRINITY_DN5199_c0_g1_i1.p1	type:complete gc:universal TRINITY_DN5199_c0_g1_i1:1240-2(-)	False	0	6.60023	4.61165	2	6	2	1	412	45.15	9.33	High	High	Not Found	Not Found	Not Found	Not Found	Not Found	Not Found	High	Not Found	Not Found	Not Found	High	High		15.8644	2
False	High	IsMasterProtein	TRINITY_DN2022_c0_g1_i15.p1	type:complete gc:universal TRINITY_DN2022_c0_g1_i15:4042-8229(+)	False	0	6.59906	2.58065	3	6	1	1	1395	162.641	4.35	Not Found	Not Found	Not Found	Not Found	Not Found	Not Found	Not Found	Not Found	Not Found	Not Found	High	High	Not Found	Not Found		10.5031	3
False	High	IsMasterProtein	TRINITY_DN353_c0_g1_i8.p1	type:complete gc:universal TRINITY_DN353_c0_g1_i8:79-14037(+)	False	0	6.53284	0.365434	1	6	1	1	4652	528.883	6.37	High	Not Found	Not Found	Not Found	Not Found	Not Found	Not Found	Not Found	Not Found	Not Found	Not Found	Not Found	Not Found	Not Found		3.18343	1
False	High	IsMasterProtein	TRINITY_DN3284_c0_g1_i3.p1	type:complete gc:universal TRINITY_DN3284_c0_g1_i3:111-767(+)	False	0	6.53032	8.7156	2	6	2	1	218	23.489	8.07	High	High	High	High	High	High	High	High	High	High	High	High	High	High		53.8714	2
False	High	IsMasterProtein	TRINITY_DN13553_c0_g1_i5.p1	type:complete gc:universal TRINITY_DN13553_c0_g1_i5:2599-2063(-)	False	0	6.51414	8.98876	1	6	1	1	178	20.17	5.08	High	High	Not Found	Not Found	Not Found	Not Found	Not Found	Not Found	Not Found	Not Found	Not Found	Not Found	Not Found	Not Found		7.56853	1
False	High	IsMasterProtein	TRINITY_DN9816_c0_g1_i1.p1	type:complete gc:universal TRINITY_DN9816_c0_g1_i1:147-3881(+)	False	0	6.48562	2.65273	2	6	2	1	1244	136.813	7.05	Not Found	Not Found	Not Found	Not Found	Not Found	Not Found	Not Found	Not Found	Not Found	Not Found	High	High	Not Found	Not Found		7.37642	2
False	High	IsMasterProtein	TRINITY_DN1327_c0_g1_i11.p1	type:complete gc:universal TRINITY_DN1327_c0_g1_i11:158-1957(+)	False	0	6.48514	5.67613	2	6	2	1	599	67.896	8.9	Not Found	Not Found	High	High	High	High	Not Found	Not Found	Not Found	Not Found	High	High	Not Found	Not Found		16.0687	2
False	High	IsMasterProtein	TRINITY_DN5056_c0_g1_i17.p1	type:complete gc:universal TRINITY_DN5056_c0_g1_i17:683-345(-)	False	0	6.47157	20.5357	2	6	2	1	112	11.417	4.53	Not Found	Not Found	Not Found	Not Found	Not Found	Not Found	Not Found	Not Found	High	High	Not Found	Not Found	High	High		8.82557	2
False	High	IsMasterProtein	TRINITY_DN2221_c0_g2_i1.p1	type:complete gc:universal TRINITY_DN2221_c0_g2_i1:115-1842(+)	False	0	6.44094	2.95652	2	6	2	1	575	63.407	9.28	High	High	Not Found	Not Found	Not Found	Not Found	Not Found	Not Found	High	High	Not Found	Not Found	High	High		4.13902	2
False	High	IsMasterProtein	TRINITY_DN1041_c0_g1_i11.p1	type:5prime_partial gc:universal TRINITY_DN1041_c0_g1_i11:1400-864(-)	False	0	6.39748	13.4831	2	6	2	1	178	20.868	8.73	Not Found	High	High	High	Not Found	Not Found	High	High	Not Found	High	Not Found	High	Not Found	Not Found		13.3308	2
False	High	IsMasterProtein	TRINITY_DN2272_c0_g1_i15.p1	type:complete gc:universal TRINITY_DN2272_c0_g1_i15:2302-476(-)	False	0	6.3491	3.125	2	6	2	1	608	68.723	7.87	Not Found	Not Found	High	High	Not Found	Not Found	High	High	Not Found	Not Found	Not Found	Not Found	Not Found	Not Found		11.2734	2
False	High	IsMasterProtein	TRINITY_DN368_c0_g1_i1.p1	type:complete gc:universal TRINITY_DN368_c0_g1_i1:446-111(-)	False	0	6.34708	14.4144	1	6	1	1	111	11.291	4.21	Not Found	Not Found	High	High	Not Found	Not Found	High	Not Found	High	High	High	Not Found	High	High		24.2544	1
False	High	IsMasterProtein	TRINITY_DN2756_c0_g3_i1.p1	type:5prime_partial gc:universal TRINITY_DN2756_c0_g3_i1:1907-279(-)	False	0	6.34634	4.05904	2	6	2	1	542	62.193	7.97	High	High	High	High	High	Not Found	Not Found	Not Found	Not Found	Not Found	High	Not Found	Not Found	Not Found		17.923	2
False	High	IsMasterProtein	TRINITY_DN4993_c0_g1_i2.p1	type:complete gc:universal TRINITY_DN4993_c0_g1_i2:5205-3646(-)	False	0	6.33413	3.46821	2	6	2	1	519	57.454	6.95	High	High	Not Found	High	High	High	High	Not Found	High	High	High	High	High	High		30.8482	2
False	High	IsMasterProtein	TRINITY_DN4029_c0_g1_i1.p2	type:complete gc:universal TRINITY_DN4029_c0_g1_i1:1582-1199(-)	False	0	6.266	12.5984	1	6	1	1	127	14.432	4.94	Not Found	Not Found	Not Found	Not Found	Not Found	Not Found	Not Found	Not Found	Not Found	Not Found	High	Not Found	Not Found	Not Found		3.00813	1
False	High	IsMasterProtein	TRINITY_DN235_c0_g1_i4.p1	type:complete gc:universal TRINITY_DN235_c0_g1_i4:250-1509(+)	False	0	6.25499	5.2506	2	6	2	1	419	47.881	4.96	Not Found	Not Found	Not Found	Not Found	Not Found	Not Found	Not Found	Not Found	Not Found	Not Found	High	High	Not Found	Not Found		7.02717	2
False	High	IsMasterProtein	TRINITY_DN3138_c0_g1_i14.p1	type:complete gc:universal TRINITY_DN3138_c0_g1_i14:1926-274(-)	False	0	6.25344	5.09091	2	5	2	1	550	60.836	6.48	Not Found	Not Found	Not Found	High	Not Found	Not Found	High	Not Found	Not Found	Not Found	Not Found	Not Found	Not Found	Not Found		4.38009	2
False	High	IsMasterProtein	TRINITY_DN10797_c0_g2_i11.p1	type:complete gc:universal TRINITY_DN10797_c0_g2_i11:1283-270(-)	False	0	6.24323	2.96736	2	5	2	1	337	36.779	4.6	Not Found	Not Found	Not Found	Not Found	Not Found	High	Not Found	Not Found	Not Found	Not Found	High	Not Found	Not Found	Not Found		9.36444	2
False	High	IsMasterProtein	TRINITY_DN27588_c0_g1_i1.p2	type:complete gc:universal TRINITY_DN27588_c0_g1_i1:503-165(-)	False	0	6.22212	16.0714	2	5	2	1	112	12.572	8.29	High	High	High	High	High	Not Found	Not Found	Not Found	High	High	Not Found	High	High	Not Found		24.3461	2
False	High	IsMasterProtein	Cont_P02666	Beta-casein OS=Bos taurus OX=9913 GN=CSN2 PE=1 SV=2	True	0	6.21488	11.6071	2	5	2	1	224	25.091	5.35	Not Found	Not Found	High	Not Found	Not Found	Not Found	Not Found	Not Found	Not Found	Not Found	Not Found	Not Found	Not Found	High		8.19506	2
False	High	IsMasterProtein	TRINITY_DN22167_c0_g1_i1.p1	type:5prime_partial gc:universal TRINITY_DN22167_c0_g1_i1:2418-1135(-)	False	0	6.20625	6.08899	3	5	3	1	427	48.356	5.71	Not Found	Not Found	Not Found	Not Found	Not Found	High	Not Found	Not Found	Not Found	Not Found	High	High	Not Found	Not Found		7.70124	3
False	High	IsMasterProtein	TRINITY_DN3609_c0_g1_i11.p1	type:complete gc:universal TRINITY_DN3609_c0_g1_i11:319-1701(+)	False	0	6.20144	5	2	5	2	1	460	49.942	7.97	High	Not Found	Not Found	Not Found	Not Found	Not Found	High	High	High	High	Not Found	Not Found	High	High		22.2553	2
False	High	IsMasterProtein	TRINITY_DN13877_c0_g1_i12.p1	type:5prime_partial gc:universal TRINITY_DN13877_c0_g1_i12:1-2913(+)	False	0	6.17647	1.75258	2	5	2	1	970	108.404	7.42	Not Found	High	Not Found	Not Found	Not Found	Not Found	Not Found	Not Found	High	High	Not Found	Not Found	High	Not Found		12.1178	2
False	High	IsMasterProtein	TRINITY_DN10030_c0_g1_i1.p1	type:complete gc:universal TRINITY_DN10030_c0_g1_i1:53-520(+)	False	0	6.15214	12.9032	2	5	2	1	155	17.158	8.28	High	High	Not Found	Not Found	Not Found	High	High	High	High	High	High	Not Found	High	High		29.2054	2
False	High	IsMasterProtein	TRINITY_DN10258_c0_g1_i3.p1	type:complete gc:universal TRINITY_DN10258_c0_g1_i3:296-1984(+)	False	0	6.13071	2.31317	1	5	1	1	562	63.582	8.27	Not Found	Not Found	Not Found	Not Found	Not Found	Not Found	Not Found	Not Found	Not Found	Not Found	High	High	Not Found	Not Found		5.48178	1
False	High	IsMasterProtein	TRINITY_DN4890_c0_g1_i12.p1	type:complete gc:universal TRINITY_DN4890_c0_g1_i12:1615-53(-)	False	0	6.10239	4.61538	2	5	2	1	520	58.531	7.65	Not Found	Not Found	High	High	Not Found	Not Found	Not Found	Not Found	Not Found	Not Found	High	High	Not Found	Not Found		5.77611	2
False	High	IsMasterProtein	TRINITY_DN3023_c0_g1_i1.p1	type:complete gc:universal TRINITY_DN3023_c0_g1_i1:2096-447(-)	False	0	6.06464	3.27869	1	5	1	1	549	61.233	5.36	Not Found	Not Found	Not Found	Not Found	Not Found	Not Found	Not Found	Not Found	High	High	High	Not Found	Not Found	Not Found		9.66431	1
False	High	IsMasterProtein	TRINITY_DN4236_c0_g1_i13.p1	type:complete gc:universal TRINITY_DN4236_c0_g1_i13:4087-1991(-)	False	0	6.05257	2.29226	1	5	1	1	698	77.879	8.02	High	Not Found	Not Found	Not Found	Not Found	Not Found	Not Found	Not Found	Not Found	Not Found	Not Found	Not Found	Not Found	Not Found		4.36857	1
False	High	IsMasterProtein	TRINITY_DN4728_c0_g1_i1.p1	type:5prime_partial gc:universal TRINITY_DN4728_c0_g1_i1:3-1379(+)	False	0	6.0473	3.27511	1	5	1	1	458	52.323	8.85	Not Found	Not Found	Not Found	Not Found	High	Not Found	High	Not Found	Not Found	High	Not Found	Not Found	Not Found	Not Found		8.14258	1
False	High	IsMasterProtein	Cont_Q3MHH8	Alpha-amylase OS=Bos taurus OX=9913 GN=AMY2A PE=2 SV=1	True	0	6.03135	3.32681	2	5	1	1	511	57.371	6.42	High	High	High	High	High	Not Found	High	High	High	High	Not Found	Not Found	Not Found	Not Found		14.0851	2
False	High	IsMasterProtein	TRINITY_DN24912_c0_g1_i2.p1	type:complete gc:universal TRINITY_DN24912_c0_g1_i2:2221-221(-)	False	0	6.00793	2.4024	1	5	1	1	666	73.632	5.69	Not Found	Not Found	Not Found	Not Found	Not Found	Not Found	Not Found	Not Found	Not Found	Not Found	High	Not Found	Not Found	Not Found		3.61387	1
False	High	IsMasterProtein	TRINITY_DN68635_c0_g1_i1.p1	type:3prime_partial gc:universal TRINITY_DN68635_c0_g1_i1:35-1081(+)	False	0	5.99487	4.87106	2	5	2	1	349	40.373	8.22	High	High	High	High	High	High	Not Found	Not Found	Not Found	High	High	High	Not Found	Not Found		17.4252	2
False	High	IsMasterProtein	TRINITY_DN8418_c0_g1_i1.p1	type:complete gc:universal TRINITY_DN8418_c0_g1_i1:186-4100(+)	False	0	5.98093	1.45706	2	5	2	1	1304	149.893	6.37	High	Not Found	Not Found	Not Found	Not Found	Not Found	Not Found	Not Found	Not Found	Not Found	Not Found	Not Found	Not Found	Not Found		4.15645	2
False	High	IsMasterProtein	TRINITY_DN5876_c0_g1_i3.p1	type:complete gc:universal TRINITY_DN5876_c0_g1_i3:125-2866(+)	False	0	5.95861	1.20482	1	5	1	1	913	103.322	6.67	Not Found	Not Found	Not Found	Not Found	Not Found	Not Found	High	High	Not Found	Not Found	Not Found	Not Found	Not Found	Not Found		1.67468	1
False	High	IsMasterProtein	TRINITY_DN1468_c0_g1_i7.p1	type:complete gc:universal TRINITY_DN1468_c0_g1_i7:2070-43(-)	False	0	5.95151	2.96296	2	5	2	1	675	76.362	4.67	High	High	Not Found	High	Not Found	Not Found	Not Found	Not Found	High	Not Found	Not Found	Not Found	High	Not Found		12.0235	2
False	High	IsMasterProtein	TRINITY_DN5349_c0_g1_i1.p1	type:complete gc:universal TRINITY_DN5349_c0_g1_i1:1049-234(-)	False	0	5.93817	6.27306	1	5	1	1	271	29.181	9.13	Not Found	High	Not Found	Not Found	High	High	Not Found	High	High	Not Found	Not Found	Not Found	High	High		23.0971	1
False	High	IsMasterProtein	TRINITY_DN1379_c0_g1_i4.p1	type:complete gc:universal TRINITY_DN1379_c0_g1_i4:4196-2139(-)	False	0	5.92996	3.79562	3	5	3	1	685	78.845	6.55	Not Found	Not Found	Not Found	High	Not Found	Not Found	High	High	Not Found	Not Found	Not Found	Not Found	Not Found	Not Found		9.7429	3
False	High	IsMasterProtein	TRINITY_DN1911_c0_g1_i1.p1	type:complete gc:universal TRINITY_DN1911_c0_g1_i1:1473-733(-)	False	0	5.9164	6.91057	2	5	2	1	246	27.43	4.97	High	High	Not Found	Not Found	Not Found	Not Found	Not Found	Not Found	High	High	Not Found	Not Found	Not Found	High		8.44397	2
False	High	IsMasterProtein	TRINITY_DN11983_c0_g1_i1.p1	type:complete gc:universal TRINITY_DN11983_c0_g1_i1:219-1706(+)	False	0	5.89873	3.83838	2	5	2	1	495	56.08	5.15	High	High	Not Found	Not Found	High	High	High	Not Found	High	High	High	High	High	High		25.0846	2
False	High	IsMasterProtein	TRINITY_DN7057_c0_g1_i3.p1	type:complete gc:universal TRINITY_DN7057_c0_g1_i3:198-1958(+)	False	0	5.85807	4.26621	2	5	2	1	586	66.102	6.28	High	High	Not Found	Not Found	Not Found	Not Found	Not Found	Not Found	Not Found	Not Found	High	Not Found	Not Found	High		8.93447	2
False	High	IsMasterProtein	TRINITY_DN1877_c0_g1_i1.p1	type:complete gc:universal TRINITY_DN1877_c0_g1_i1:2231-786(-)	False	0	5.85329	5.19751	2	5	2	1	481	53.978	6.67	Not Found	Not Found	Not Found	High	High	Not Found	Not Found	Not Found	Not Found	Not Found	High	High	Not Found	Not Found		12.4139	2
False	High	IsMasterProtein	TRINITY_DN4700_c0_g1_i2.p1	type:complete gc:universal TRINITY_DN4700_c0_g1_i2:1735-713(-)	False	0	5.82915	4.11765	1	5	1	1	340	37.216	8.9	Not Found	Not Found	Not Found	Not Found	Not Found	High	Not Found	Not Found	Not Found	High	Not Found	Not Found	High	High		11.2372	1
False	High	IsMasterProtein	TRINITY_DN236_c2_g1_i1.p1	type:5prime_partial gc:universal TRINITY_DN236_c2_g1_i1:4311-3280(-)	False	0	5.8129	7.28863	2	5	2	1	343	37.497	7.14	Not Found	Not Found	High	High	Not Found	Not Found	Not Found	Not Found	Not Found	Not Found	Not Found	Not Found	Not Found	Not Found		6.78951	2
False	High	IsMasterProtein	TRINITY_DN5238_c0_g1_i1.p1	type:complete gc:universal TRINITY_DN5238_c0_g1_i1:691-293(-)	False	0	5.76966	18.9394	2	5	2	1	132	14.795	8.44	Not Found	Not Found	Not Found	Not Found	Not Found	Not Found	Not Found	Not Found	High	High	Not Found	Not Found	High	High		10.2705	2
False	High	IsMasterProtein	TRINITY_DN6815_c0_g1_i9.p1	type:complete gc:universal TRINITY_DN6815_c0_g1_i9:1714-875(-)	False	0.00104058	5.71813	8.96057	2	5	2	1	279	28.466	7.44	High	High	Not Found	Not Found	High	High	Not Found	Not Found	Not Found	High	High	Not Found	Not Found	Not Found		2.44655	2
False	High	IsMasterProtein	TRINITY_DN388_c0_g1_i33.p1	type:5prime_partial gc:universal TRINITY_DN388_c0_g1_i33:2495-405(-)	False	0.00104058	5.69814	4.31034	2	5	2	1	696	71.853	5.52	Not Found	Not Found	High	High	Not Found	Not Found	Not Found	Not Found	Not Found	Not Found	Not Found	High	Not Found	Not Found		8.72313	2
False	High	IsMasterProtein	TRINITY_DN4246_c0_g1_i10.p1	type:complete gc:universal TRINITY_DN4246_c0_g1_i10:4284-2815(-)	False	0.00104058	5.69016	3.27198	1	5	1	1	489	54.81	7.68	High	High	Not Found	Not Found	Not Found	Not Found	Not Found	Not Found	High	Not Found	High	High	High	Not Found		17.3801	1
False	High	IsMasterProtein	TRINITY_DN2547_c0_g1_i10.p1	type:complete gc:universal TRINITY_DN2547_c0_g1_i10:62-1231(+)	False	0.00104058	5.67136	4.37018	2	5	2	1	389	43.832	8.44	Not Found	High	Not Found	Not Found	Not Found	High	Not Found	Not Found	High	High	High	Not Found	High	High		15.4753	2
False	High	IsMasterProtein	TRINITY_DN3973_c0_g1_i10.p1	type:complete gc:universal TRINITY_DN3973_c0_g1_i10:7088-5820(-)	False	0.00104058	5.66476	5.21327	2	5	2	1	422	46.852	5.96	Not Found	Not Found	Not Found	Not Found	Not Found	Not Found	Not Found	Not Found	Not Found	Not Found	High	High	Not Found	Not Found		7.92649	2
False	High	IsMasterProtein	TRINITY_DN63340_c0_g1_i1.p1	type:complete gc:universal TRINITY_DN63340_c0_g1_i1:112-1656(+)	False	0.00104058	5.65857	2.91829	1	5	1	1	514	58.858	8.62	Not Found	Not Found	Not Found	Not Found	Not Found	Not Found	High	Not Found	Not Found	Not Found	Not Found	Not Found	Not Found	Not Found		4.5246	1
False	High	IsMasterProtein	TRINITY_DN5150_c0_g1_i12.p1	type:complete gc:universal TRINITY_DN5150_c0_g1_i12:240-2240(+)	False	0.00104058	5.64493	2.7027	2	5	2	1	666	75.77	6.95	Not Found	Not Found	Not Found	Not Found	High	Not Found	Not Found	Not Found	Not Found	Not Found	High	High	Not Found	Not Found		3.84715	2
False	High	IsMasterProtein	TRINITY_DN3141_c0_g1_i1.p1	type:complete gc:universal TRINITY_DN3141_c0_g1_i1:556-104(-)	False	0.00104058	5.62431	13.3333	2	5	2	1	150	16.935	9.55	High	Not Found	Not Found	Not Found	Not Found	High	Not Found	Not Found	High	Not Found	Not Found	Not Found	Not Found	Not Found		1.91901	2
False	High	IsMasterProtein	TRINITY_DN828_c0_g1_i3.p1	type:complete gc:universal TRINITY_DN828_c0_g1_i3:483-1454(+)	False	0.00104058	5.56572	5.57276	2	5	2	1	323	36.804	6.89	Not Found	High	Not Found	Not Found	High	Not Found	Not Found	Not Found	High	High	Not Found	Not Found	Not Found	Not Found		6.42768	2
False	High	IsMasterProtein	TRINITY_DN4981_c0_g1_i2.p1	type:complete gc:universal TRINITY_DN4981_c0_g1_i2:2080-158(-)	False	0.00104058	5.56358	1.875	1	5	1	1	640	71.326	6.09	High	High	Not Found	Not Found	Not Found	Not Found	Not Found	Not Found	High	High	Not Found	Not Found	Not Found	Not Found		9.57349	1
False	High	IsMasterProtein	TRINITY_DN231_c0_g1_i10.p1	type:complete gc:universal TRINITY_DN231_c0_g1_i10:5399-3084(-)	False	0.00104058	5.56209	1.68612	1	5	1	1	771	83.878	5.57	Not Found	Not Found	Not Found	High	Not Found	Not Found	Not Found	Not Found	Not Found	Not Found	Not Found	Not Found	Not Found	Not Found		2.80597	1
False	High	IsMasterProtein	TRINITY_DN4320_c1_g1_i10.p1	type:complete gc:universal TRINITY_DN4320_c1_g1_i10:180-1664(+)	False	0.00104058	5.547	4.04858	2	5	2	1	494	57.194	9.03	High	High	Not Found	Not Found	Not Found	Not Found	Not Found	Not Found	High	High	Not Found	Not Found	Not Found	Not Found		9.81052	2
False	High	IsMasterProtein	TRINITY_DN2444_c4_g1_i1.p1	type:complete gc:universal TRINITY_DN2444_c4_g1_i1:3168-337(-)	False	0.00104058	5.53709	2.01485	2	5	2	1	943	108.022	8.98	Not Found	Not Found	Not Found	Not Found	High	High	Not Found	Not Found	Not Found	Not Found	Not Found	Not Found	Not Found	Not Found		3.86072	2
False	High	IsMasterProtein	TRINITY_DN5911_c0_g1_i1.p1	type:complete gc:universal TRINITY_DN5911_c0_g1_i1:150-1406(+)	False	0.00104058	5.53165	4.78469	2	5	2	1	418	46.884	6.13	Not Found	Not Found	Not Found	Not Found	Not Found	High	Not Found	Not Found	Not Found	Not Found	High	High	Not Found	Not Found		7.13636	2
False	High	IsMasterProtein	TRINITY_DN2757_c0_g1_i2.p1	type:complete gc:universal TRINITY_DN2757_c0_g1_i2:2801-870(-)	False	0.00104058	5.52506	1.71073	1	5	1	1	643	71.674	5.05	High	High	High	High	Not Found	High	High	High	High	High	High	Not Found	Not Found	Not Found		27.7813	1
False	High	IsMasterProtein	TRINITY_DN9475_c0_g1_i2.p2	type:complete gc:universal TRINITY_DN9475_c0_g1_i2:590-2215(+)	False	0.00104058	5.51584	2.21811	1	5	1	1	541	59.744	8.27	High	High	Not Found	Not Found	Not Found	Not Found	Not Found	Not Found	Not Found	High	Not Found	Not Found	High	High		10.5832	1
False	High	IsMasterProtein	TRINITY_DN983_c0_g1_i2.p2	type:complete gc:universal TRINITY_DN983_c0_g1_i2:155-706(+)	False	0.00104058	5.501	6.01093	1	5	1	1	183	20.832	9.73	High	High	High	High	Not Found	Not Found	Not Found	Not Found	High	High	High	High	High	High		26.6731	1
False	High	IsMasterProtein	TRINITY_DN5443_c0_g1_i1.p1	type:complete gc:universal TRINITY_DN5443_c0_g1_i1:226-2466(+)	False	0.00104058	5.49526	2.27882	2	5	2	1	746	83.388	4.93	Not Found	High	Not Found	Not Found	Not Found	Not Found	Not Found	Not Found	High	High	Not Found	Not Found	Not Found	Not Found		7.72697	2
False	High	IsMasterProtein	TRINITY_DN13788_c0_g1_i5.p1	type:complete gc:universal TRINITY_DN13788_c0_g1_i5:2080-620(-)	False	0.00104058	5.47006	2.88066	1	5	1	1	486	54.331	6.29	Not Found	Not Found	High	High	Not Found	Not Found	Not Found	Not Found	Not Found	Not Found	Not Found	Not Found	Not Found	Not Found		7.06073	1
False	High	IsMasterProtein	TRINITY_DN9338_c0_g1_i4.p1	type:complete gc:universal TRINITY_DN9338_c0_g1_i4:2211-154(-)	False	0.00104058	5.46307	2.62774	2	5	2	1	685	74.624	8.03	Not Found	Not Found	High	High	High	High	High	High	Not Found	Not Found	High	High	High	Not Found		19.2485	2
False	High	IsMasterProtein	TRINITY_DN4330_c0_g1_i3.p1	type:complete gc:universal TRINITY_DN4330_c0_g1_i3:747-361(-)	False	0.00104058	5.46111	19.5312	2	5	2	1	128	13.937	9.36	High	Not Found	Not Found	Not Found	Not Found	Not Found	Not Found	Not Found	High	Not Found	Not Found	Not Found	Not Found	Not Found		7.07613	2
False	High	IsMasterProtein	TRINITY_DN9281_c0_g1_i4.p1	type:complete gc:universal TRINITY_DN9281_c0_g1_i4:814-2100(+)	False	0.00104058	5.44117	3.50467	1	5	1	1	428	47.485	8.16	Not Found	Not Found	Not Found	Not Found	High	High	Not Found	Not Found	Not Found	Not Found	Not Found	Not Found	Not Found	Not Found		4.98111	1
False	High	IsMasterProtein	TRINITY_DN3103_c0_g1_i9.p1	type:complete gc:universal TRINITY_DN3103_c0_g1_i9:1580-54(-)	False	0.00104058	5.41648	4.13386	2	5	2	1	508	58.743	6.81	Not Found	Not Found	High	Not Found	Not Found	Not Found	High	High	Not Found	Not Found	Not Found	Not Found	Not Found	Not Found		6.94444	2
False	High	IsMasterProtein	TRINITY_DN12154_c1_g2_i3.p1	type:complete gc:universal TRINITY_DN12154_c1_g2_i3:646-98(-)	False	0.00104058	5.40627	8.24176	1	5	1	1	182	19.735	6.35	Not Found	High	Not Found	Not Found	Not Found	Not Found	Not Found	Not Found	High	Not Found	Not Found	Not Found	Not Found	Not Found		3.71172	1
False	High	IsMasterProtein	TRINITY_DN4311_c0_g1_i2.p1	type:5prime_partial gc:universal TRINITY_DN4311_c0_g1_i2:896-33(-)	False	0.00104058	5.40516	6.62021	2	5	2	1	287	33.35	10.59	Not Found	Not Found	Not Found	High	Not Found	Not Found	Not Found	Not Found	Not Found	Not Found	High	High	Not Found	Not Found		8.87056	2
False	High	IsMasterProtein	TRINITY_DN3753_c0_g1_i11.p1	type:complete gc:universal TRINITY_DN3753_c0_g1_i11:2848-1025(-)	False	0.00104058	5.38455	5.27183	2	5	2	1	607	68.192	7.47	High	High	Not Found	Not Found	High	Not Found	Not Found	Not Found	High	High	Not Found	Not Found	Not Found	Not Found		9.5199	2
False	High	IsMasterProtein	TRINITY_DN3183_c0_g1_i10.p1	type:3prime_partial gc:universal TRINITY_DN3183_c0_g1_i10:62-1621(+)	False	0.00104058	5.38294	2.88462	2	5	2	1	520	58.806	6.34	Not Found	Not Found	High	High	Not Found	Not Found	Not Found	High	Not Found	Not Found	Not Found	High	Not Found	Not Found		7.33383	2
False	High	IsMasterProtein	TRINITY_DN151_c0_g1_i14.p1	type:5prime_partial gc:universal TRINITY_DN151_c0_g1_i14:2241-658(-)	False	0.00104058	5.38107	4.74383	2	5	2	1	527	59.624	6.84	Not Found	Not Found	High	High	Not Found	Not Found	Not Found	Not Found	Not Found	Not Found	Not Found	Not Found	Not Found	Not Found		5.03719	2
False	High	IsMasterProtein	TRINITY_DN322_c0_g1_i1.p1	type:5prime_partial gc:universal TRINITY_DN322_c0_g1_i1:3936-955(-)	False	0.00104058	5.36817	2.1148	2	5	2	1	993	114.407	6.58	Not Found	Not Found	High	High	Not Found	Not Found	Not Found	High	Not Found	Not Found	Not Found	Not Found	Not Found	Not Found		6.9008	2
False	High	IsMasterProtein	TRINITY_DN15926_c0_g1_i1.p1	type:complete gc:universal TRINITY_DN15926_c0_g1_i1:1419-100(-)	False	0.00104058	5.36725	6.60592	2	5	2	1	439	50.85	5.49	Not Found	Not Found	Not Found	Not Found	High	High	Not Found	Not Found	Not Found	Not Found	High	High	Not Found	Not Found		10.9738	2
False	High	IsMasterProtein	TRINITY_DN1670_c0_g1_i5.p1	type:complete gc:universal TRINITY_DN1670_c0_g1_i5:4256-156(-)	False	0.00104058	5.36394	1.31772	2	5	1	1	1366	152.536	8.38	High	High	Not Found	Not Found	Not Found	Not Found	Not Found	Not Found	Not Found	Not Found	Not Found	Not Found	Not Found	Not Found		5.12482	2
False	High	IsMasterProtein	TRINITY_DN7376_c0_g1_i2.p1	type:complete gc:universal TRINITY_DN7376_c0_g1_i2:226-2130(+)	False	0.00104058	5.34285	2.2082	1	5	1	1	634	68.718	8.22	Not Found	Not Found	Not Found	Not Found	Not Found	Not Found	Not Found	Not Found	Not Found	Not Found	High	High	Not Found	Not Found		6.94078	1
False	High	IsMasterProtein	TRINITY_DN2782_c0_g1_i3.p1	type:5prime_partial gc:universal TRINITY_DN2782_c0_g1_i3:1927-95(-)	False	0.00104058	5.33035	5.2459	3	4	3	1	610	69.593	4.68	Not Found	Not Found	Not Found	Not Found	Not Found	Not Found	High	High	Not Found	Not Found	Not Found	Not Found	Not Found	Not Found		3.3019	3
False	High	IsMasterProtein	TRINITY_DN2549_c0_g1_i20.p1	type:complete gc:universal TRINITY_DN2549_c0_g1_i20:4042-2399(-)	False	0.00104058	5.32799	2.74223	2	4	2	1	547	62.18	6.46	Not Found	Not Found	High	Not Found	Not Found	Not Found	Not Found	Not Found	Not Found	Not Found	High	High	Not Found	Not Found		6.46359	2
False	High	IsMasterProtein	TRINITY_DN3801_c0_g1_i1.p1	type:5prime_partial gc:universal TRINITY_DN3801_c0_g1_i1:1-1755(+)	False	0.00104058	5.25921	5.99315	3	4	3	1	584	65.241	6.44	High	High	High	High	Not Found	Not Found	Not Found	Not Found	High	High	Not Found	Not Found	Not Found	High		7.8322	3
False	High	IsMasterProtein	TRINITY_DN2326_c1_g1_i1.p1	type:5prime_partial gc:universal TRINITY_DN2326_c1_g1_i1:1283-120(-)	False	0.00104058	5.2473	5.68475	2	4	2	1	387	45.043	4.56	Not Found	Not Found	Not Found	Not Found	Not Found	Not Found	Not Found	Not Found	High	Not Found	Not Found	Not Found	Not Found	Not Found		4.34726	2
False	High	IsMasterProtein	TRINITY_DN6191_c0_g1_i2.p1	type:complete gc:universal TRINITY_DN6191_c0_g1_i2:331-1971(+)	False	0.00104058	5.24476	3.11355	2	4	2	1	546	60.026	6.96	Not Found	Not Found	High	High	Not Found	Not Found	High	High	Not Found	Not Found	Not Found	Not Found	Not Found	Not Found		3.52776	2
False	High	IsMasterProtein	TRINITY_DN96_c0_g2_i1.p1	type:complete gc:universal TRINITY_DN96_c0_g2_i1:2535-1423(-)	False	0.00104058	5.23642	2.7027	1	4	1	1	370	40.752	9.23	High	High	High	High	High	High	High	High	High	High	High	High	High	High		31.3631	1
False	High	IsMasterProtein	TRINITY_DN229_c2_g2_i1.p1	type:complete gc:universal TRINITY_DN229_c2_g2_i1:261-1013(+)	False	0.00104058	5.22912	10	2	4	2	1	250	28.576	9.04	Not Found	Not Found	Not Found	Not Found	Not Found	Not Found	Not Found	Not Found	High	High	Not Found	Not Found	Not Found	High		4.04262	2
False	High	IsMasterProtein	TRINITY_DN3330_c0_g1_i3.p1	type:complete gc:universal TRINITY_DN3330_c0_g1_i3:244-1662(+)	False	0.00104058	5.19033	6.14407	2	4	2	1	472	51.37	5.01	Not Found	Not Found	High	High	Not Found	Not Found	Not Found	Not Found	Not Found	Not Found	Not Found	Not Found	Not Found	Not Found		5.39818	2
False	High	IsMasterProtein	TRINITY_DN1301_c0_g1_i10.p1	type:3prime_partial gc:universal TRINITY_DN1301_c0_g1_i10:164-13471(+)	False	0.00104058	5.09346	0.743913	3	4	3	1	4436	492.992	5.3	High	High	Not Found	Not Found	Not Found	Not Found	Not Found	Not Found	Not Found	High	Not Found	Not Found	Not Found	Not Found		3.8521	3
False	High	IsMasterProtein	TRINITY_DN20316_c0_g1_i11.p1	type:complete gc:universal TRINITY_DN20316_c0_g1_i11:4203-451(-)	False	0.00104058	5.09264	1.52	1	4	1	1	1250	140.556	5.54	Not Found	Not Found	High	Not Found	Not Found	Not Found	Not Found	Not Found	Not Found	Not Found	Not Found	High	Not Found	Not Found		4.84064	1
False	High	IsMasterProtein	TRINITY_DN2198_c0_g1_i12.p1	type:complete gc:universal TRINITY_DN2198_c0_g1_i12:434-1549(+)	False	0.00104058	5.05032	3.2345	1	4	1	1	371	42.697	7.49	High	High	Not Found	Not Found	Not Found	Not Found	Not Found	Not Found	High	High	Not Found	Not Found	High	Not Found		2.12414	1
False	High	IsMasterProtein	TRINITY_DN3722_c0_g1_i1.p1	type:complete gc:universal TRINITY_DN3722_c0_g1_i1:1656-79(-)	False	0.00104058	5.03984	3.04762	2	4	2	1	525	60.107	5.87	High	High	Not Found	Not Found	Not Found	High	High	Not Found	High	High	Not Found	Not Found	High	High		13.1673	2
False	High	IsMasterProtein	TRINITY_DN10362_c0_g1_i1.p1	type:complete gc:universal TRINITY_DN10362_c0_g1_i1:129-1784(+)	False	0.00104058	5.03484	3.81125	2	4	2	1	551	60.991	8.75	Not Found	Not Found	High	High	Not Found	Not Found	Not Found	Not Found	Not Found	Not Found	Not Found	Not Found	Not Found	Not Found		7.03114	2
False	High	IsMasterProtein	TRINITY_DN3401_c0_g1_i12.p1	type:complete gc:universal TRINITY_DN3401_c0_g1_i12:48-1613(+)	False	0.00104058	5.01759	2.11132	1	4	1	1	521	57.151	6.3	Not Found	Not Found	High	High	High	High	High	High	Not Found	Not Found	High	High	Not Found	Not Found		12.6813	1
False	High	IsMasterProtein	Cont_P20930	Filaggrin OS=Homo sapiens OX=9606 GN=FLG PE=1 SV=3	True	0.00104058	4.97306	0.246245	1	4	1	1	4061	434.922	9.25	High	High	High	High	Not Found	High	High	High	High	High	High	High	Not Found	Not Found		31.7265	1
False	High	IsMasterProtein	TRINITY_DN259_c0_g1_i2.p1	type:complete gc:universal TRINITY_DN259_c0_g1_i2:2696-1152(-)	False	0.00104058	4.97077	5.25292	3	4	3	1	514	57.422	9.17	Not Found	Not Found	Not Found	Not Found	Not Found	Not Found	Not Found	Not Found	Not Found	Not Found	High	High	Not Found	Not Found		10.5634	3
False	High	IsMasterProtein	TRINITY_DN13749_c0_g1_i1.p1	type:complete gc:universal TRINITY_DN13749_c0_g1_i1:104-403(+)	False	0.00104058	4.96341	15.1515	2	4	2	1	99	10.655	9.8	High	High	Not Found	Not Found	High	High	High	High	High	High	High	Not Found	High	Not Found		20.4933	2
False	High	IsMasterProtein	TRINITY_DN28364_c0_g1_i2.p1	type:complete gc:universal TRINITY_DN28364_c0_g1_i2:158-892(+)	False	0.00104058	4.96092	7.78689	2	4	2	1	244	26.397	8.76	Not Found	Not Found	High	Not Found	Not Found	Not Found	Not Found	Not Found	High	High	Not Found	Not Found	High	High		12.579	2
False	High	IsMasterProtein	TRINITY_DN452_c0_g1_i13.p1	type:complete gc:universal TRINITY_DN452_c0_g1_i13:757-2037(+)	False	0.00104058	4.9179	5.6338	2	4	2	1	426	46.609	8.24	Not Found	Not Found	Not Found	Not Found	Not Found	Not Found	Not Found	Not Found	Not Found	Not Found	High	High	Not Found	Not Found		9.84519	2
False	High	IsMasterProtein	TRINITY_DN1060_c0_g1_i2.p1	type:complete gc:universal TRINITY_DN1060_c0_g1_i2:126-1463(+)	False	0.00104058	4.90344	3.14607	1	4	1	1	445	49.183	7.21	Not Found	Not Found	Not Found	Not Found	Not Found	Not Found	Not Found	Not Found	Not Found	Not Found	High	High	Not Found	Not Found		4.69802	1
False	High	IsMasterProtein	TRINITY_DN1833_c0_g1_i1.p1	type:complete gc:universal TRINITY_DN1833_c0_g1_i1:2398-224(-)	False	0.00104058	4.89415	1.65746	1	4	1	1	724	83.702	7.59	Not Found	Not Found	High	High	Not Found	Not Found	High	High	Not Found	Not Found	Not Found	Not Found	Not Found	Not Found		10.4351	1
False	High	IsMasterProtein	TRINITY_DN1764_c0_g1_i11.p2	type:complete gc:universal TRINITY_DN1764_c0_g1_i11:1833-1393(-)	False	0.00167364	4.85437	14.3836	2	4	2	1	146	16.553	7.24	High	High	Not Found	Not Found	Not Found	Not Found	High	High	High	High	Not Found	Not Found	High	Not Found		18.7813	2
False	High	IsMasterProtein	TRINITY_DN5127_c0_g1_i2.p2	type:complete gc:universal TRINITY_DN5127_c0_g1_i2:3571-2150(-)	False	0.00167364	4.84345	2.32558	1	4	1	1	473	52.094	8.22	Not Found	High	High	High	Not Found	Not Found	High	High	High	High	Not Found	Not Found	High	High		26.768	1
False	High	IsMasterProtein	TRINITY_DN2666_c0_g1_i1.p1	type:complete gc:universal TRINITY_DN2666_c0_g1_i1:4332-3715(-)	False	0.00167364	4.76258	12.1951	2	4	2	1	205	22.162	6.7	Not Found	Not Found	Not Found	Not Found	High	Not Found	Not Found	Not Found	Not Found	Not Found	Not Found	High	Not Found	High		5.67025	2
False	High	IsMasterProtein	TRINITY_DN1920_c0_g1_i22.p1	type:complete gc:universal TRINITY_DN1920_c0_g1_i22:1886-1230(-)	False	0.00167364	4.69789	4.58716	1	4	1	1	218	24.817	8.07	High	High	Not Found	Not Found	Not Found	Not Found	Not Found	Not Found	High	High	Not Found	Not Found	High	Not Found		8.54329	1
False	High	IsMasterProtein	TRINITY_DN2082_c2_g1_i1.p1	type:5prime_partial gc:universal TRINITY_DN2082_c2_g1_i1:702-22(-)	False	0.00167364	4.69744	7.07965	2	4	1	1	226	25.72	9.47	Not Found	Not Found	Not Found	High	Not Found	Not Found	High	Not Found	Not Found	Not Found	Not Found	Not Found	Not Found	Not Found		28.9828	2
False	High	IsMasterProtein	TRINITY_DN5926_c0_g1_i5.p1	type:5prime_partial gc:universal TRINITY_DN5926_c0_g1_i5:3-2138(+)	False	0.00167364	4.64859	2.391	1	4	1	1	711	77.353	9.48	Not Found	Not Found	High	High	Not Found	Not Found	Not Found	Not Found	Not Found	Not Found	Not Found	Not Found	Not Found	Not Found		6.88439	1
False	High	IsMasterProtein	TRINITY_DN3243_c0_g1_i2.p1	type:5prime_partial gc:universal TRINITY_DN3243_c0_g1_i2:3-1820(+)	False	0.00167364	4.6153	2.64463	2	4	2	1	605	69.592	7.55	Not Found	High	Not Found	Not Found	Not Found	Not Found	Not Found	Not Found	Not Found	Not Found	Not Found	Not Found	High	Not Found		2.1941	2
False	High	IsMasterProtein	TRINITY_DN3693_c0_g1_i14.p1	type:complete gc:universal TRINITY_DN3693_c0_g1_i14:3126-1009(-)	False	0.00167364	4.57125	3.12057	2	4	2	1	705	79.455	4.93	Not Found	Not Found	Not Found	High	Not Found	Not Found	High	Not Found	Not Found	Not Found	Not Found	Not Found	Not Found	Not Found		2.83017	2
False	High	IsMasterProtein	TRINITY_DN5016_c0_g1_i1.p1	type:complete gc:universal TRINITY_DN5016_c0_g1_i1:1204-725(-)	False	0.00167364	4.55834	13.8365	2	4	2	1	159	17.26	11.14	Not Found	Not Found	Not Found	Not Found	Not Found	Not Found	Not Found	Not Found	Not Found	Not Found	High	High	Not Found	Not Found		8.35187	2
False	High	IsMasterProtein	TRINITY_DN17037_c0_g1_i1.p1	type:complete gc:universal TRINITY_DN17037_c0_g1_i1:134-1678(+)	False	0.00167364	4.55522	3.30739	2	4	2	1	514	57.672	5.02	Not Found	Not Found	Not Found	Not Found	High	Not Found	Not Found	Not Found	Not Found	Not Found	High	High	Not Found	Not Found		5.65632	2
False	High	IsMasterProtein	TRINITY_DN5235_c0_g1_i1.p1	type:complete gc:universal TRINITY_DN5235_c0_g1_i1:942-169(-)	False	0.00167364	4.52666	4.28016	1	4	1	1	257	27.776	5.5	High	Not Found	Not Found	Not Found	Not Found	Not Found	Not Found	Not Found	High	High	Not Found	Not Found	Not Found	Not Found		4.93776	1
False	High	IsMasterProtein	TRINITY_DN14770_c0_g1_i2.p1	type:internal gc:universal TRINITY_DN14770_c0_g1_i2:3-542(+)	False	0.00167364	4.50197	8.88889	1	4	1	1	180	19.488	6.58	Not Found	Not Found	Not Found	Not Found	High	High	Not Found	Not Found	Not Found	Not Found	High	Not Found	Not Found	Not Found		8.08242	1
False	High	IsMasterProtein	TRINITY_DN4377_c0_g1_i1.p1	type:complete gc:universal TRINITY_DN4377_c0_g1_i1:326-1564(+)	False	0.00167364	4.50086	2.6699	1	4	1	1	412	46.64	6.34	Not Found	Not Found	Not Found	Not Found	High	High	Not Found	Not Found	Not Found	Not Found	High	High	Not Found	Not Found		8.19585	1
False	High	IsMasterProtein	TRINITY_DN24912_c0_g1_i7.p3	type:3prime_partial gc:universal TRINITY_DN24912_c0_g1_i7:482-3(-)	False	0.00167364	4.4836	7.5	1	4	1	1	160	17.795	5.68	Not Found	Not Found	Not Found	Not Found	High	High	Not Found	Not Found	Not Found	Not Found	High	High	Not Found	Not Found		10.6014	1
False	High	IsMasterProtein	TRINITY_DN404_c0_g1_i3.p1	type:complete gc:universal TRINITY_DN404_c0_g1_i3:154-522(+)	False	0.00167364	4.47405	12.2951	1	4	1	1	122	13.239	9.77	Not Found	High	Not Found	Not Found	Not Found	Not Found	Not Found	Not Found	Not Found	Not Found	Not Found	Not Found	Not Found	Not Found		2.56204	1
False	High	IsMasterProtein	TRINITY_DN216_c0_g1_i32.p4	type:5prime_partial gc:universal TRINITY_DN216_c0_g1_i32:3-341(+)	False	0.00167364	4.45125	14.2857	2	4	1	1	112	12.679	9.01	High	Not Found	Not Found	Not Found	Not Found	Not Found	Not Found	Not Found	Not Found	High	Not Found	Not Found	Not Found	Not Found		3.93274	2
False	High	IsMasterProtein	TRINITY_DN1698_c0_g1_i3.p1	type:complete gc:universal TRINITY_DN1698_c0_g1_i3:201-2054(+)	False	0.00167364	4.43815	4.86224	3	4	3	1	617	65.042	4.96	Not Found	Not Found	High	High	Not Found	Not Found	Not Found	Not Found	Not Found	Not Found	Not Found	High	Not Found	Not Found		9.32766	3
False	High	IsMasterProtein	TRINITY_DN32634_c0_g2_i1.p1	type:complete gc:universal TRINITY_DN32634_c0_g2_i1:2380-104(-)	False	0.00167364	4.42902	2.77045	2	4	2	1	758	87.036	6.23	Not Found	Not Found	High	High	Not Found	Not Found	High	Not Found	Not Found	Not Found	Not Found	Not Found	Not Found	Not Found		6.16352	2
False	High	IsMasterProtein	TRINITY_DN6864_c0_g1_i1.p1	type:complete gc:universal TRINITY_DN6864_c0_g1_i1:2739-1408(-)	False	0.00167364	4.41263	2.7088	1	4	1	1	443	50.474	6.3	Not Found	Not Found	High	High	Not Found	Not Found	Not Found	Not Found	Not Found	Not Found	Not Found	Not Found	Not Found	Not Found		6.97258	1
False	High	IsMasterProtein	TRINITY_DN532_c0_g1_i1.p1	type:complete gc:universal TRINITY_DN532_c0_g1_i1:2200-938(-)	False	0.00167364	4.40572	2.38095	1	4	1	1	420	47.595	5.34	Not Found	Not Found	Not Found	Not Found	Not Found	Not Found	Not Found	Not Found	High	Not Found	Not Found	Not Found	Not Found	High		1.87302	1
False	High	IsMasterProtein	TRINITY_DN6023_c0_g1_i2.p1	type:complete gc:universal TRINITY_DN6023_c0_g1_i2:2077-149(-)	False	0.00167364	4.4022	1.7134	1	4	1	1	642	73.218	6.54	Not Found	Not Found	High	Not Found	Not Found	Not Found	Not Found	Not Found	Not Found	Not Found	Not Found	Not Found	Not Found	Not Found		2.25334	1
False	High	IsMasterProtein	TRINITY_DN3901_c0_g1_i1.p1	type:complete gc:universal TRINITY_DN3901_c0_g1_i1:246-917(+)	False	0.00167364	4.40154	9.41704	1	4	1	1	223	25.246	8.78	High	High	Not Found	Not Found	Not Found	Not Found	High	High	High	High	Not Found	Not Found	High	Not Found		4.87098	1
False	High	IsMasterProtein	TRINITY_DN7730_c0_g1_i29.p1	type:5prime_partial gc:universal TRINITY_DN7730_c0_g1_i29:3378-430(-)	False	0.00167364	4.39459	1.01833	1	4	1	1	982	98.121	6.25	High	High	Not Found	Not Found	Not Found	Not Found	Not Found	Not Found	High	High	Not Found	Not Found	Not Found	Not Found		6.88426	1
False	High	IsMasterProtein	TRINITY_DN23734_c0_g1_i1.p1	type:complete gc:universal TRINITY_DN23734_c0_g1_i1:1743-169(-)	False	0.00167364	4.3887	2.09924	1	4	1	1	524	58.488	6.71	Not Found	Not Found	Not Found	Not Found	Not Found	Not Found	Not Found	Not Found	Not Found	Not Found	High	High	Not Found	Not Found		5.77019	1
False	High	IsMasterProtein	TRINITY_DN701_c0_g1_i1.p1	type:complete gc:universal TRINITY_DN701_c0_g1_i1:128-1951(+)	False	0.00167364	4.38626	1.97694	1	4	1	1	607	65.777	7.05	Not Found	Not Found	High	High	Not Found	Not Found	Not Found	Not Found	Not Found	Not Found	Not Found	Not Found	Not Found	Not Found		5.56079	1
False	High	IsMasterProtein	TRINITY_DN4681_c0_g1_i1.p1	type:internal gc:universal TRINITY_DN4681_c0_g1_i1:3649-2(-)	False	0.00167364	4.37662	1.39803	2	4	2	1	1216	136.329	6.02	High	High	Not Found	Not Found	Not Found	Not Found	Not Found	Not Found	Not Found	Not Found	Not Found	Not Found	Not Found	Not Found		4.16299	2
False	High	IsMasterProtein	TRINITY_DN2597_c0_g1_i3.p1	type:complete gc:universal TRINITY_DN2597_c0_g1_i3:97-1338(+)	False	0.00167364	4.3582	4.60048	2	4	2	1	413	46.97	10.21	Not Found	Not Found	Not Found	Not Found	Not Found	Not Found	Not Found	Not Found	Not Found	Not Found	High	High	Not Found	Not Found		8.16536	2
False	High	IsMasterProtein	TRINITY_DN3632_c0_g1_i9.p1	type:internal gc:universal TRINITY_DN3632_c0_g1_i9:1-606(+)	False	0.00167364	4.35454	8.41584	2	4	1	1	202	22.867	9.14	Not Found	Not Found	Not Found	Not Found	Not Found	Not Found	Not Found	Not Found	Not Found	Not Found	High	Not Found	Not Found	Not Found		23.3415	2
False	High	IsMasterProtein	TRINITY_DN4486_c0_g1_i1.p2	type:3prime_partial gc:universal TRINITY_DN4486_c0_g1_i1:1260-1(-)	False	0.00167364	4.35222	6.42857	3	4	3	1	420	45.037	6.8	Not Found	Not Found	High	High	Not Found	Not Found	Not Found	Not Found	Not Found	Not Found	High	High	Not Found	Not Found		12.7668	3
False	High	IsMasterProtein	TRINITY_DN1056_c0_g1_i26.p1	type:complete gc:universal TRINITY_DN1056_c0_g1_i26:1963-251(-)	False	0.00167364	4.32256	3.15789	2	4	2	1	570	63.18	8.03	Not Found	Not Found	Not Found	Not Found	High	High	Not Found	Not Found	Not Found	Not Found	High	High	Not Found	Not Found		5.26089	2
False	High	IsMasterProtein	TRINITY_DN1826_c0_g1_i3.p1	type:complete gc:universal TRINITY_DN1826_c0_g1_i3:380-2011(+)	False	0.00167364	4.31398	3.8674	2	4	2	1	543	60.032	6.9	Not Found	Not Found	High	Not Found	Not Found	Not Found	Not Found	Not Found	Not Found	High	High	High	Not Found	Not Found		3.53702	2
False	High	IsMasterProtein	TRINITY_DN8579_c0_g1_i2.p1	type:complete gc:universal TRINITY_DN8579_c0_g1_i2:90-1277(+)	False	0.00167364	4.29611	3.03797	1	4	1	1	395	44.532	7.87	Not Found	Not Found	High	High	Not Found	Not Found	Not Found	High	Not Found	Not Found	Not Found	Not Found	High	High		11.3354	1
False	High	IsMasterProtein	TRINITY_DN3734_c0_g1_i3.p1	type:complete gc:universal TRINITY_DN3734_c0_g1_i3:233-850(+)	False	0.00167364	4.27951	5.36585	1	3	1	1	205	21.695	8.25	High	High	Not Found	Not Found	High	High	High	Not Found	High	High	High	High	High	High		29.8794	1
False	High	IsMasterProtein	TRINITY_DN3159_c0_g1_i1.p1	type:complete gc:universal TRINITY_DN3159_c0_g1_i1:208-984(+)	False	0.00167364	4.26217	4.65116	1	3	1	1	258	28.809	9.7	High	High	Not Found	High	Not Found	Not Found	High	High	High	High	Not Found	Not Found	High	High		28.473	1
False	High	IsMasterProtein	TRINITY_DN3247_c0_g1_i2.p1	type:5prime_partial gc:universal TRINITY_DN3247_c0_g1_i2:2-682(+)	False	0.00167364	4.2577	7.07965	2	3	2	1	226	24.774	7.4	High	Not Found	Not Found	Not Found	Not Found	High	High	High	High	High	Not Found	Not Found	High	High		15.2324	2
False	High	IsMasterProtein	TRINITY_DN15563_c0_g1_i2.p1	type:complete gc:universal TRINITY_DN15563_c0_g1_i2:1201-614(-)	False	0.00167364	4.21574	5.64103	1	3	1	1	195	22.912	9.57	Not Found	High	Not Found	High	Not Found	Not Found	Not Found	Not Found	Not Found	Not Found	Not Found	Not Found	High	High		11.6904	1
False	High	IsMasterProtein	TRINITY_DN281_c1_g2_i1.p1	type:3prime_partial gc:universal TRINITY_DN281_c1_g2_i1:933-1(-)	False	0.00167364	4.18475	4.50161	1	3	1	1	311	33.553	4.53	Not Found	Not Found	High	High	Not Found	Not Found	High	Not Found	Not Found	Not Found	Not Found	High	Not Found	Not Found		10.7792	1
False	High	IsMasterProtein	TRINITY_DN2077_c0_g1_i1.p1	type:complete gc:universal TRINITY_DN2077_c0_g1_i1:6890-2439(-)	False	0.00167364	4.1834	1.48348	2	3	2	1	1483	160.081	5.96	High	Not Found	High	Not Found	Not Found	Not Found	Not Found	Not Found	High	Not Found	Not Found	Not Found	Not Found	High		8.40604	2
False	High	IsMasterProtein	TRINITY_DN5223_c0_g2_i1.p1	type:3prime_partial gc:universal TRINITY_DN5223_c0_g2_i1:2420-3(-)	False	0.00167364	4.15658	1.98511	1	3	1	1	806	90.531	7.55	Not Found	Not Found	Not Found	High	Not Found	High	High	High	Not Found	Not Found	High	Not Found	Not Found	Not Found		12.8622	1
False	High	IsMasterProtein	TRINITY_DN1022_c0_g1_i16.p2	type:complete gc:universal TRINITY_DN1022_c0_g1_i16:3047-3679(+)	False	0.00167364	4.15558	4.28571	1	3	1	1	210	21.758	5.47	High	High	High	Not Found	High	High	Not Found	Not Found	Not Found	High	Not Found	Not Found	High	Not Found		18.729	1
False	High	IsMasterProtein	TRINITY_DN1026_c0_g1_i40.p1	type:complete gc:universal TRINITY_DN1026_c0_g1_i40:880-56(-)	False	0.00167364	4.14539	3.28467	1	3	1	1	274	28.349	8.73	Not Found	Not Found	Not Found	High	High	Not Found	Not Found	High	High	High	High	High	Not Found	High		16.1567	1
False	High	IsMasterProtein	TRINITY_DN5276_c0_g1_i10.p1	type:complete gc:universal TRINITY_DN5276_c0_g1_i10:180-2549(+)	False	0.00167364	4.13136	1.90114	1	3	1	1	789	89.151	5.67	Not Found	Not Found	Not Found	High	Not Found	Not Found	High	High	Not Found	Not Found	High	Not Found	Not Found	Not Found		5.80186	1
False	High	IsMasterProtein	TRINITY_DN4019_c0_g1_i16.p1	type:complete gc:universal TRINITY_DN4019_c0_g1_i16:2562-1330(-)	False	0.00167364	4.09762	3.17073	1	3	1	1	410	46.432	7.05	Not Found	Not Found	Not Found	Not Found	Not Found	Not Found	Not Found	Not Found	Not Found	Not Found	Not Found	High	Not Found	Not Found		2.28953	1
False	High	IsMasterProtein	TRINITY_DN7354_c0_g1_i2.p1	type:complete gc:universal TRINITY_DN7354_c0_g1_i2:97-786(+)	False	0.00167364	4.09458	6.55022	1	3	1	1	229	24.699	8.18	Not Found	Not Found	Not Found	Not Found	Not Found	Not Found	Not Found	Not Found	Not Found	High	Not Found	Not Found	Not Found	Not Found		2.24955	1
False	High	IsMasterProtein	TRINITY_DN3303_c0_g1_i6.p1	type:5prime_partial gc:universal TRINITY_DN3303_c0_g1_i6:2-751(+)	False	0.00167364	4.08959	4.81928	1	3	1	1	249	27.931	4.97	Not Found	Not Found	Not Found	Not Found	Not Found	Not Found	Not Found	Not Found	Not Found	Not Found	Not Found	High	Not Found	Not Found		2.56169	1
False	High	IsMasterProtein	TRINITY_DN8627_c0_g1_i1.p1	type:complete gc:universal TRINITY_DN8627_c0_g1_i1:1459-464(-)	False	0.00167364	4.06783	4.83384	1	3	1	1	331	38.775	8.25	Not Found	High	Not Found	Not Found	Not Found	Not Found	Not Found	High	High	High	Not Found	High	High	High		15.1189	1
False	High	IsMasterProtein	TRINITY_DN23_c0_g1_i1.p1	type:complete gc:universal TRINITY_DN23_c0_g1_i1:214-1857(+)	False	0.00167364	4.04163	2.3766	1	3	1	1	547	58.964	7.15	Not Found	Not Found	High	High	Not Found	Not Found	Not Found	Not Found	Not Found	Not Found	Not Found	Not Found	Not Found	Not Found		4.68342	1
False	High	IsMasterProtein	TRINITY_DN53_c0_g1_i4.p1	type:complete gc:universal TRINITY_DN53_c0_g1_i4:165-4862(+)	False	0.00167364	4.03951	0.702875	1	3	1	1	1565	178.006	6.95	Not Found	Not Found	High	Not Found	Not Found	Not Found	Not Found	Not Found	Not Found	Not Found	High	High	Not Found	Not Found		0	1
False	High	IsMasterProtein	TRINITY_DN5652_c0_g1_i1.p1	type:5prime_partial gc:universal TRINITY_DN5652_c0_g1_i1:1-1662(+)	False	0.00167364	4.02923	2.53165	1	3	1	1	553	61.561	4.61	Not Found	Not Found	Not Found	High	Not Found	Not Found	High	High	High	Not Found	Not Found	Not Found	Not Found	Not Found		11.0446	1
False	High	IsMasterProtein	TRINITY_DN9959_c0_g1_i1.p1	type:complete gc:universal TRINITY_DN9959_c0_g1_i1:153-884(+)	False	0.00167364	4.00979	4.93827	1	3	1	1	243	26.784	5.06	High	Not Found	Not Found	Not Found	Not Found	Not Found	Not Found	Not Found	Not Found	Not Found	Not Found	Not Found	Not Found	Not Found		2.73149	1
False	High	IsMasterProtein	TRINITY_DN3577_c0_g1_i3.p1	type:complete gc:universal TRINITY_DN3577_c0_g1_i3:2136-430(-)	False	0.00167364	4.00035	3.16901	1	3	1	1	568	63.049	7.23	Not Found	High	Not Found	Not Found	Not Found	Not Found	Not Found	Not Found	Not Found	High	Not Found	Not Found	Not Found	Not Found		5.76991	1
False	High	IsMasterProtein	TRINITY_DN14368_c0_g1_i1.p1	type:complete gc:universal TRINITY_DN14368_c0_g1_i1:2077-368(-)	False	0.00167364	3.98387	2.6362	2	3	2	1	569	64.207	5.82	High	Not Found	High	High	High	Not Found	High	Not Found	Not Found	High	High	High	High	High		15.5385	2
False	High	IsMasterProtein	TRINITY_DN5734_c0_g1_i11.p1	type:complete gc:universal TRINITY_DN5734_c0_g1_i11:594-2228(+)	False	0.00167364	3.96243	1.83824	1	3	1	1	544	59.033	7.62	High	Not Found	Not Found	Not Found	High	High	Not Found	Not Found	High	High	Not Found	Not Found	High	Not Found		11.2956	1
False	High	IsMasterProtein	TRINITY_DN1108_c1_g1_i2.p1	type:internal gc:universal TRINITY_DN1108_c1_g1_i2:902-3(-)	False	0.00167364	3.95742	3.33333	1	3	1	1	300	27.811	4.78	Not Found	Not Found	Not Found	Not Found	Not Found	Not Found	Not Found	Not Found	High	Not Found	Not Found	Not Found	Not Found	Not Found		1.95815	1
False	High	IsMasterProtein	TRINITY_DN4158_c0_g1_i2.p1	type:complete gc:universal TRINITY_DN4158_c0_g1_i2:9430-3818(-)	False	0.00167364	3.94846	0.641711	1	3	1	1	1870	185.024	8.84	High	High	Not Found	Not Found	Not Found	Not Found	Not Found	Not Found	Not Found	Not Found	Not Found	Not Found	High	Not Found		9.05835	1
False	High	IsMasterProtein	TRINITY_DN4036_c0_g1_i11.p1	type:complete gc:universal TRINITY_DN4036_c0_g1_i11:2016-1207(-)	False	0.00167364	3.94233	5.57621	1	3	1	1	269	27.283	6.52	Not Found	Not Found	Not Found	Not Found	High	Not Found	Not Found	Not Found	Not Found	High	Not Found	Not Found	Not Found	Not Found		6.64004	1
False	High	IsMasterProtein	TRINITY_DN1688_c0_g1_i12.p1	type:complete gc:universal TRINITY_DN1688_c0_g1_i12:3791-1818(-)	False	0.00167364	3.93779	1.36986	1	3	1	1	657	74.415	7.91	High	High	High	High	High	High	High	High	Not Found	High	Not Found	High	High	Not Found		23.992	1
False	High	IsMasterProtein	TRINITY_DN3027_c0_g1_i3.p1	type:complete gc:universal TRINITY_DN3027_c0_g1_i3:1619-222(-)	False	0.00167364	3.93367	2.36559	1	3	1	1	465	52.532	4.96	Not Found	Not Found	Not Found	High	Not Found	Not Found	Not Found	Not Found	Not Found	Not Found	High	Not Found	Not Found	Not Found		4.38668	1
False	High	IsMasterProtein	TRINITY_DN451_c0_g1_i10.p1	type:complete gc:universal TRINITY_DN451_c0_g1_i10:6653-3747(-)	False	0.00167364	3.9287	1.54959	2	3	2	1	968	110.413	6.77	Not Found	Not Found	High	High	High	Not Found	Not Found	High	Not Found	Not Found	High	High	Not Found	Not Found		8.68081	2
False	High	IsMasterProtein	TRINITY_DN2910_c0_g5_i1.p1	type:complete gc:universal TRINITY_DN2910_c0_g5_i1:3755-2475(-)	False	0.00167364	3.88788	3.52113	2	3	2	1	426	48.373	8.85	Not Found	Not Found	High	High	Not Found	Not Found	High	High	Not Found	Not Found	High	Not Found	Not Found	Not Found		13.7251	2
False	High	IsMasterProtein	TRINITY_DN9383_c0_g1_i2.p1	type:complete gc:universal TRINITY_DN9383_c0_g1_i2:668-1900(+)	False	0.00167364	3.87644	3.41463	2	3	2	1	410	48.439	8.05	Not Found	Not Found	Not Found	Not Found	High	High	Not Found	Not Found	Not Found	Not Found	High	High	Not Found	Not Found		7.0522	2
False	High	IsMasterProtein	TRINITY_DN4185_c0_g1_i1.p1	type:complete gc:universal TRINITY_DN4185_c0_g1_i1:1150-203(-)	False	0.00167364	3.86999	3.49206	1	3	1	1	315	33.952	6.57	Not Found	Not Found	Not Found	Not Found	High	Not Found	Not Found	Not Found	High	High	High	High	Not Found	Not Found		10.8126	1
False	High	IsMasterProtein	TRINITY_DN170_c0_g1_i12.p1	type:complete gc:universal TRINITY_DN170_c0_g1_i12:2998-2045(-)	False	0.00167364	3.85017	5.04732	2	3	2	1	317	34.525	9.66	High	High	High	Not Found	High	Not Found	Not Found	Not Found	Not Found	Not Found	High	Not Found	Not Found	Not Found		11.7899	2
False	High	IsMasterProtein	TRINITY_DN9581_c0_g1_i1.p1	type:internal gc:universal TRINITY_DN9581_c0_g1_i1:3-425(+)	False	0.00167364	3.85	21.2766	2	3	2	1	141	15.106	8.59	Not Found	Not Found	Not Found	High	Not Found	Not Found	Not Found	High	Not Found	Not Found	Not Found	Not Found	Not Found	Not Found		2.6418	2
False	High	IsMasterProtein	TRINITY_DN6464_c0_g1_i2.p1	type:complete gc:universal TRINITY_DN6464_c0_g1_i2:131-2533(+)	False	0.00167364	3.81695	2	2	3	2	1	800	92.736	7.03	Not Found	Not Found	Not Found	Not Found	Not Found	Not Found	Not Found	Not Found	High	High	Not Found	Not Found	Not Found	Not Found		1.64336	2
False	High	IsMasterProtein	TRINITY_DN2240_c0_g1_i12.p1	type:complete gc:universal TRINITY_DN2240_c0_g1_i12:1109-687(-)	False	0.00167364	3.81051	6.42857	1	3	1	1	140	15.26	10.15	Not Found	Not Found	Not Found	Not Found	Not Found	Not Found	Not Found	Not Found	High	High	Not Found	Not Found	Not Found	Not Found		1.6662	1
False	High	IsMasterProtein	TRINITY_DN16970_c1_g1_i1.p1	type:complete gc:universal TRINITY_DN16970_c1_g1_i1:818-363(-)	False	0.00167364	3.80939	5.96026	1	3	1	1	151	16.906	5.66	High	High	Not Found	Not Found	Not Found	Not Found	Not Found	Not Found	Not Found	Not Found	Not Found	Not Found	Not Found	Not Found		4.63728	1
False	High	IsMasterProtein	TRINITY_DN4257_c0_g1_i10.p1	type:complete gc:universal TRINITY_DN4257_c0_g1_i10:6110-3531(-)	False	0.00167364	3.79915	1.16414	1	3	1	1	859	96.408	5.99	Not Found	Not Found	High	High	Not Found	Not Found	High	High	Not Found	Not Found	High	High	Not Found	Not Found		17.8059	1
False	High	IsMasterProtein	TRINITY_DN8792_c0_g1_i1.p1	type:complete gc:universal TRINITY_DN8792_c0_g1_i1:4278-748(-)	False	0.00167364	3.79023	1.78571	2	3	2	1	1176	138.289	7.14	Not Found	Not Found	Not Found	Not Found	Not Found	Not Found	Not Found	Not Found	High	High	Not Found	Not Found	Not Found	Not Found		7.00681	2
False	High	IsMasterProtein	TRINITY_DN4430_c0_g1_i3.p2	type:internal gc:universal TRINITY_DN4430_c0_g1_i3:828-1(-)	False	0.00167364	3.78888	3.26087	1	3	1	1	276	30.025	11.37	Not Found	Not Found	Not Found	Not Found	Not Found	Not Found	Not Found	Not Found	Not Found	Not Found	High	Not Found	Not Found	Not Found		2.41364	1
False	High	IsMasterProtein	TRINITY_DN20661_c0_g3_i2.p1	type:complete gc:universal TRINITY_DN20661_c0_g3_i2:187-1536(+)	False	0.00167364	3.77521	3.34076	1	3	1	1	449	52.01	7.2	Not Found	Not Found	Not Found	Not Found	Not Found	Not Found	Not Found	Not Found	High	Not Found	Not Found	Not Found	Not Found	High		4.23223	1
False	High	IsMasterProtein	TRINITY_DN185_c0_g1_i5.p1	type:complete gc:universal TRINITY_DN185_c0_g1_i5:1420-707(-)	False	0.00167364	3.76574	4.64135	1	3	1	1	237	25.484	7.72	Not Found	High	Not Found	Not Found	Not Found	Not Found	Not Found	Not Found	Not Found	Not Found	Not Found	Not Found	Not Found	Not Found		2.62082	1
False	High	IsMasterProtein	TRINITY_DN6983_c0_g1_i1.p1	type:5prime_partial gc:universal TRINITY_DN6983_c0_g1_i1:3-608(+)	False	0.00167364	3.7607	5.97015	1	3	1	1	201	23.756	9.74	Not Found	Not Found	Not Found	Not Found	Not Found	Not Found	High	Not Found	Not Found	Not Found	Not Found	Not Found	High	Not Found		2.61463	1
False	High	IsMasterProtein	TRINITY_DN654_c0_g2_i2.p1	type:complete gc:universal TRINITY_DN654_c0_g2_i2:1144-377(-)	False	0.00167364	3.75498	9.80392	1	3	1	1	255	27.01	9.35	Not Found	High	Not Found	Not Found	Not Found	Not Found	Not Found	Not Found	Not Found	Not Found	Not Found	Not Found	Not Found	Not Found		3.05317	1
False	High	IsMasterProtein	TRINITY_DN4806_c0_g1_i2.p1	type:complete gc:universal TRINITY_DN4806_c0_g1_i2:1278-10(-)	False	0.00167364	3.7428	2.8436	1	3	1	1	422	48.378	9.16	Not Found	Not Found	Not Found	Not Found	Not Found	High	Not Found	Not Found	Not Found	Not Found	Not Found	Not Found	Not Found	Not Found		2.20432	1
False	High	IsMasterProtein	TRINITY_DN504_c0_g2_i8.p1	type:internal gc:universal TRINITY_DN504_c0_g2_i8:578-3(-)	False	0.00167364	3.72354	5.20833	1	3	1	1	192	20.983	10.32	High	High	Not Found	Not Found	Not Found	Not Found	Not Found	Not Found	High	Not Found	Not Found	Not Found	High	Not Found		8.38371	1
False	High	IsMasterProtein	Cont_P15252	Rubber elongation factor protein OS=Hevea brasiliensis OX=3981 PE=1 SV=2	True	0.00167364	3.71284	14.4928	2	3	2	1	138	14.713	5.19	High	High	Not Found	Not Found	Not Found	Not Found	Not Found	Not Found	High	High	Not Found	Not Found	High	High		16.7743	2
False	High	IsMasterProtein	TRINITY_DN473_c0_g1_i7.p1	type:complete gc:universal TRINITY_DN473_c0_g1_i7:2909-1677(-)	False	0.00167364	3.67572	2.68293	1	3	1	1	410	46.204	8.38	High	High	High	Not Found	Not Found	Not Found	Not Found	High	High	Not Found	Not Found	Not Found	Not Found	Not Found		9.00499	1
False	High	IsMasterProtein	TRINITY_DN7678_c0_g1_i11.p2	type:complete gc:universal TRINITY_DN7678_c0_g1_i11:979-2364(+)	False	0.00167364	3.65797	2.1692	1	3	1	1	461	53.886	7.52	Not Found	Not Found	Not Found	Not Found	High	Not Found	Not Found	Not Found	Not Found	Not Found	Not Found	Not Found	Not Found	Not Found		2.12696	1
False	High	IsMasterProtein	TRINITY_DN5213_c0_g1_i1.p1	type:complete gc:universal TRINITY_DN5213_c0_g1_i1:1336-542(-)	False	0.00167364	3.64378	3.40909	1	3	1	1	264	28.654	4.3	Not Found	Not Found	Not Found	Not Found	Not Found	Not Found	High	Not Found	High	High	Not Found	Not Found	High	Not Found		11.869	1
False	High	IsMasterProtein	TRINITY_DN5_c0_g1_i2.p1	type:complete gc:universal TRINITY_DN5_c0_g1_i2:535-1599(+)	False	0.00167364	3.63866	6.21469	2	3	2	1	354	40.451	5.44	Not Found	Not Found	High	Not Found	Not Found	High	Not Found	Not Found	Not Found	Not Found	High	Not Found	Not Found	Not Found		5.45493	2
False	High	IsMasterProtein	TRINITY_DN31203_c0_g1_i1.p1	type:complete gc:universal TRINITY_DN31203_c0_g1_i1:1067-522(-)	False	0.00167364	3.62324	8.28729	1	3	1	1	181	19.921	4.65	Not Found	Not Found	High	Not Found	Not Found	Not Found	Not Found	Not Found	Not Found	Not Found	Not Found	Not Found	Not Found	Not Found		3.61066	1
False	High	IsMasterProtein	TRINITY_DN2805_c0_g1_i1.p1	type:complete gc:universal TRINITY_DN2805_c0_g1_i1:2663-1170(-)	False	0.00167364	3.62215	1.60966	1	3	1	1	497	54.124	8	High	High	High	High	High	Not Found	High	High	High	High	High	High	High	High		26.2606	1
False	High	IsMasterProtein	TRINITY_DN7497_c0_g1_i3.p1	type:3prime_partial gc:universal TRINITY_DN7497_c0_g1_i3:1982-3(-)	False	0.00167364	3.61726	1.51515	1	3	1	1	660	73.002	6.64	Not Found	Not Found	Not Found	Not Found	Not Found	Not Found	Not Found	Not Found	Not Found	Not Found	Not Found	Not Found	High	High		4.24188	1
False	High	IsMasterProtein	TRINITY_DN8007_c0_g1_i1.p1	type:complete gc:universal TRINITY_DN8007_c0_g1_i1:6161-468(-)	False	0.00167364	3.60137	0.896152	1	3	1	1	1897	211.54	6.47	Not Found	Not Found	Not Found	Not Found	Not Found	Not Found	Not Found	Not Found	High	High	Not Found	Not Found	Not Found	Not Found		5.30247	1
False	High	IsMasterProtein	TRINITY_DN4990_c0_g1_i1.p1	type:complete gc:universal TRINITY_DN4990_c0_g1_i1:1567-671(-)	False	0.00167364	3.59207	6.37584	2	3	2	1	298	32.105	9.09	Not Found	Not Found	Not Found	Not Found	Not Found	High	Not Found	High	Not Found	Not Found	Not Found	Not Found	Not Found	Not Found		1.88762	2
False	High	IsMasterProtein	TRINITY_DN3655_c0_g1_i4.p1	type:complete gc:universal TRINITY_DN3655_c0_g1_i4:1542-49(-)	False	0.00167364	3.59057	3.82294	1	3	1	1	497	54.077	7.71	Not Found	Not Found	Not Found	Not Found	Not Found	Not Found	Not Found	Not Found	Not Found	Not Found	Not Found	High	Not Found	Not Found		3.00429	1
False	High	IsMasterProtein	TRINITY_DN808_c0_g1_i1.p1	type:complete gc:universal TRINITY_DN808_c0_g1_i1:914-153(-)	False	0.00167364	3.58637	5.13834	1	3	1	1	253	27.352	4.79	Not Found	Not Found	High	Not Found	Not Found	Not Found	Not Found	Not Found	Not Found	Not Found	High	Not Found	Not Found	Not Found		4.95069	1
False	High	IsMasterProtein	TRINITY_DN7491_c0_g1_i1.p1	type:complete gc:universal TRINITY_DN7491_c0_g1_i1:187-723(+)	False	0.00167364	3.58436	8.42697	1	3	1	1	178	20.234	9.13	Not Found	High	Not Found	Not Found	Not Found	Not Found	High	Not Found	Not Found	Not Found	Not Found	High	Not Found	Not Found		4.05912	1
False	High	IsMasterProtein	TRINITY_DN2622_c0_g1_i11.p1	type:complete gc:universal TRINITY_DN2622_c0_g1_i11:2314-491(-)	False	0.00167364	3.54267	3.13015	2	3	2	1	607	66.164	4.5	Not Found	Not Found	High	High	High	Not Found	High	High	Not Found	Not Found	Not Found	Not Found	Not Found	Not Found		7.12577	2
False	High	IsMasterProtein	TRINITY_DN8970_c0_g1_i2.p1	type:complete gc:universal TRINITY_DN8970_c0_g1_i2:1881-190(-)	False	0.00167364	3.5391	1.95382	1	3	1	1	563	61.087	7.85	High	Not Found	Not Found	Not Found	Not Found	Not Found	Not Found	Not Found	High	High	Not Found	Not Found	High	Not Found		8.5519	1
False	High	IsMasterProtein	TRINITY_DN622_c0_g1_i2.p1	type:complete gc:universal TRINITY_DN622_c0_g1_i2:702-235(-)	False	0.00167364	3.50059	7.09677	1	3	1	1	155	17.876	8.87	High	High	Not Found	Not Found	High	High	High	Not Found	Not Found	High	Not Found	Not Found	Not Found	Not Found		8.57042	1
False	High	IsMasterProtein	TRINITY_DN4846_c0_g1_i2.p1	type:3prime_partial gc:universal TRINITY_DN4846_c0_g1_i2:751-2(-)	False	0.00167364	3.47978	5.6	1	3	1	1	250	28.016	6.35	Not Found	Not Found	Not Found	Not Found	Not Found	Not Found	Not Found	Not Found	Not Found	Not Found	High	High	Not Found	Not Found		4.73261	1
False	High	IsMasterProtein	TRINITY_DN2837_c0_g1_i10.p1	type:complete gc:universal TRINITY_DN2837_c0_g1_i10:117-1307(+)	False	0.00167364	3.47756	4.29293	1	3	1	1	396	41.354	8.65	Not Found	Not Found	Not Found	High	Not Found	Not Found	Not Found	Not Found	Not Found	Not Found	Not Found	Not Found	Not Found	Not Found		2.78615	1
False	High	IsMasterProtein	TRINITY_DN940_c0_g1_i1.p1	type:complete gc:universal TRINITY_DN940_c0_g1_i1:1851-28(-)	False	0.00167364	3.46143	1.97694	1	3	1	1	607	71.246	8.48	Not Found	Not Found	Not Found	Not Found	Not Found	Not Found	Not Found	Not Found	Not Found	Not Found	Not Found	High	Not Found	Not Found		2.41924	1
False	High	IsMasterProtein	TRINITY_DN1090_c0_g1_i13.p1	type:complete gc:universal TRINITY_DN1090_c0_g1_i13:179-1141(+)	False	0.00167364	3.44153	3.125	1	3	1	1	320	34.701	6.51	High	High	High	High	High	High	High	High	High	Not Found	High	High	Not Found	Not Found		29.9091	1
False	High	IsMasterProtein	TRINITY_DN1836_c0_g1_i15.p1	type:complete gc:universal TRINITY_DN1836_c0_g1_i15:2380-488(-)	False	0.00167364	3.43545	1.5873	1	3	1	1	630	69.153	5.21	Not Found	Not Found	Not Found	High	Not Found	High	Not Found	Not Found	High	High	High	Not Found	Not Found	Not Found		10.1	1
False	High	IsMasterProtein	TRINITY_DN3990_c0_g1_i10.p1	type:complete gc:universal TRINITY_DN3990_c0_g1_i10:71-1600(+)	False	0.00167364	3.42778	3.14342	2	3	1	1	509	57.979	8.02	Not Found	Not Found	High	High	Not Found	Not Found	Not Found	Not Found	Not Found	Not Found	Not Found	Not Found	Not Found	Not Found		3.59067	2
False	High	IsMasterProtein	TRINITY_DN3768_c1_g1_i4.p1	type:complete gc:universal TRINITY_DN3768_c1_g1_i4:2622-631(-)	False	0.00167364	3.42079	1.35747	1	3	1	1	663	73.136	7.31	Not Found	Not Found	Not Found	Not Found	Not Found	Not Found	Not Found	Not Found	High	Not Found	Not Found	Not Found	Not Found	Not Found		2.23581	1
False	High	IsMasterProtein	TRINITY_DN53069_c0_g1_i1.p1	type:5prime_partial gc:universal TRINITY_DN53069_c0_g1_i1:3-623(+)	False	0.00167364	3.41987	7.76699	1	3	1	1	206	20.086	7.68	Not Found	Not Found	Not Found	Not Found	Not Found	Not Found	Not Found	Not Found	High	High	Not Found	Not Found	Not Found	Not Found		4.4963	1
False	High	IsMasterProtein	TRINITY_DN817_c0_g1_i6.p1	type:complete gc:universal TRINITY_DN817_c0_g1_i6:998-60(-)	False	0.00167364	3.41976	3.52564	1	3	1	1	312	34.885	7.14	High	Not Found	High	High	High	Not Found	Not Found	Not Found	Not Found	Not Found	High	High	Not Found	High		11.8813	1
False	High	IsMasterProtein	TRINITY_DN2363_c0_g1_i11.p2	type:complete gc:universal TRINITY_DN2363_c0_g1_i11:3399-2557(-)	False	0.00167364	3.37955	3.57143	1	3	1	1	280	33.129	8.12	High	High	High	Not Found	Not Found	Not Found	Not Found	Not Found	Not Found	Not Found	Not Found	Not Found	Not Found	Not Found		5.73892	1
False	High	IsMasterProtein	TRINITY_DN2897_c0_g1_i12.p1	type:complete gc:universal TRINITY_DN2897_c0_g1_i12:1800-319(-)	False	0.00167364	3.36978	4.66531	2	3	2	1	493	55.116	8.28	Not Found	Not Found	Not Found	High	Not Found	Not Found	Not Found	High	Not Found	Not Found	Not Found	Not Found	Not Found	Not Found		4.33089	2
False	High	IsMasterProtein	TRINITY_DN20901_c0_g1_i7.p1	type:3prime_partial gc:universal TRINITY_DN20901_c0_g1_i7:689-3(-)	False	0.00167364	3.36633	4.36681	1	3	1	1	229	27.832	8.78	High	High	Not Found	Not Found	Not Found	Not Found	Not Found	Not Found	Not Found	Not Found	Not Found	Not Found	Not Found	Not Found		4.65908	1
False	High	IsMasterProtein	TRINITY_DN5324_c0_g1_i1.p1	type:complete gc:universal TRINITY_DN5324_c0_g1_i1:3760-1094(-)	False	0.00167364	3.34486	1.46396	1	3	1	1	888	100.61	7.03	Not Found	Not Found	High	High	Not Found	Not Found	Not Found	Not Found	Not Found	Not Found	Not Found	Not Found	Not Found	Not Found		5.65549	1
False	High	IsMasterProtein	TRINITY_DN109_c0_g2_i1.p1	type:5prime_partial gc:universal TRINITY_DN109_c0_g2_i1:3-506(+)	False	0.00167364	3.31069	5.38922	1	2	1	1	167	18.443	6	High	Not Found	High	High	Not Found	Not Found	Not Found	Not Found	High	High	Not Found	Not Found	High	High		18.2224	1
False	High	IsMasterProtein	TRINITY_DN9424_c0_g1_i4.p1	type:complete gc:universal TRINITY_DN9424_c0_g1_i4:1817-771(-)	False	0.00167364	3.30601	3.44828	1	2	1	1	348	39.786	8.21	Not Found	Not Found	Not Found	Not Found	Not Found	Not Found	Not Found	Not Found	Not Found	Not Found	High	High	Not Found	Not Found		5.53691	1
False	High	IsMasterProtein	TRINITY_DN1717_c0_g1_i1.p1	type:5prime_partial gc:universal TRINITY_DN1717_c0_g1_i1:1-1326(+)	False	0.00167364	3.25817	4.53515	2	2	2	1	441	49.338	6.29	Not Found	Not Found	Not Found	Not Found	Not Found	Not Found	Not Found	Not Found	Not Found	Not Found	High	Not Found	Not Found	Not Found		4.64982	2
False	High	IsMasterProtein	TRINITY_DN633_c0_g2_i1.p1	type:complete gc:universal TRINITY_DN633_c0_g2_i1:207-3122(+)	False	0.00167364	3.25449	1.95675	2	2	2	1	971	109.39	5.91	Not Found	Not Found	High	High	Not Found	Not Found	Not Found	Not Found	Not Found	Not Found	Not Found	High	Not Found	Not Found		8.18391	2
False	High	IsMasterProtein	TRINITY_DN3413_c0_g1_i1.p1	type:complete gc:universal TRINITY_DN3413_c0_g1_i1:225-2102(+)	False	0.00167364	3.24496	1.6	1	2	1	1	625	69.264	6.62	Not Found	Not Found	High	High	Not Found	Not Found	Not Found	Not Found	Not Found	Not Found	Not Found	Not Found	Not Found	Not Found		6.34127	1
False	High	IsMasterProtein	TRINITY_DN486_c0_g1_i1.p1	type:complete gc:universal TRINITY_DN486_c0_g1_i1:176-1591(+)	False	0.00167364	3.23846	6.36943	2	2	2	1	471	51.244	5.5	Not Found	Not Found	Not Found	Not Found	High	High	Not Found	Not Found	Not Found	Not Found	Not Found	Not Found	Not Found	Not Found		1.7993	2
False	High	IsMasterProtein	TRINITY_DN45181_c0_g1_i1.p1	type:complete gc:universal TRINITY_DN45181_c0_g1_i1:1163-264(-)	False	0.00167364	3.22592	5.35117	1	2	1	1	299	33.171	9.7	Not Found	Not Found	Not Found	Not Found	Not Found	Not Found	Not Found	Not Found	Not Found	Not Found	High	High	Not Found	Not Found		5.08921	1
False	High	IsMasterProtein	TRINITY_DN6960_c0_g1_i16.p1	type:complete gc:universal TRINITY_DN6960_c0_g1_i16:1504-710(-)	False	0.00167364	3.21595	3.40909	1	2	1	1	264	29.902	9.66	Not Found	Not Found	Not Found	Not Found	Not Found	High	High	High	Not Found	Not Found	Not Found	Not Found	Not Found	Not Found		4.71765	1
False	High	IsMasterProtein	TRINITY_DN620_c1_g1_i9.p1	type:complete gc:universal TRINITY_DN620_c1_g1_i9:3447-220(-)	False	0.00167364	3.20052	1.39535	1	2	1	1	1075	123.735	6.35	Not Found	Not Found	Not Found	Not Found	High	High	Not Found	Not Found	Not Found	Not Found	High	High	Not Found	Not Found		9.46978	1
False	High	IsMasterProtein	TRINITY_DN8934_c0_g1_i1.p1	type:complete gc:universal TRINITY_DN8934_c0_g1_i1:1246-4584(+)	False	0.00167364	3.19572	1.97842	2	2	2	1	1112	124.866	8.29	Not Found	Not Found	High	High	Not Found	Not Found	Not Found	Not Found	Not Found	Not Found	Not Found	Not Found	Not Found	Not Found		1.91176	2
False	High	IsMasterProtein	TRINITY_DN23914_c0_g1_i1.p1	type:5prime_partial gc:universal TRINITY_DN23914_c0_g1_i1:1-1479(+)	False	0.00167364	3.19545	1.62602	1	2	1	1	492	54.044	8.75	High	High	Not Found	Not Found	Not Found	Not Found	Not Found	Not Found	High	High	Not Found	Not Found	Not Found	Not Found		3.60868	1
False	High	IsMasterProtein	TRINITY_DN4294_c0_g1_i1.p1	type:complete gc:universal TRINITY_DN4294_c0_g1_i1:200-904(+)	False	0.00167364	3.19031	3.4188	1	2	1	1	234	26.317	8.91	Not Found	Not Found	Not Found	Not Found	Not Found	Not Found	High	High	High	High	Not Found	Not Found	High	High		12.6677	1
False	High	IsMasterProtein	TRINITY_DN13437_c0_g1_i2.p1	type:complete gc:universal TRINITY_DN13437_c0_g1_i2:3763-2483(-)	False	0.00167364	3.17679	2.11268	1	2	1	1	426	49.16	8.65	Not Found	Not Found	Not Found	Not Found	Not Found	High	Not Found	Not Found	Not Found	Not Found	Not Found	Not Found	Not Found	Not Found		2.39374	1
False	High	IsMasterProtein	TRINITY_DN34561_c0_g1_i1.p1	type:internal gc:universal TRINITY_DN34561_c0_g1_i1:3-317(+)	False	0.00167364	3.17289	9.52381	1	2	1	1	105	11.978	10.46	Not Found	Not Found	Not Found	Not Found	Not Found	Not Found	Not Found	High	Not Found	Not Found	Not Found	Not Found	Not Found	Not Found		2.50995	1
False	High	IsMasterProtein	TRINITY_DN2963_c0_g1_i2.p1	type:3prime_partial gc:universal TRINITY_DN2963_c0_g1_i2:176-1210(+)	False	0.00167364	3.16762	2.6087	1	2	1	1	345	39.72	8.98	High	Not Found	Not Found	Not Found	Not Found	Not Found	Not Found	Not Found	High	Not Found	Not Found	Not Found	Not Found	Not Found		4.29625	1
False	High	IsMasterProtein	TRINITY_DN9594_c0_g1_i11.p1	type:5prime_partial gc:universal TRINITY_DN9594_c0_g1_i11:1695-46(-)	False	0.00167364	3.16615	1.82149	1	2	1	1	549	62.378	7.75	Not Found	Not Found	Not Found	Not Found	High	High	Not Found	Not Found	Not Found	Not Found	High	High	Not Found	Not Found		8.51067	1
False	High	IsMasterProtein	TRINITY_DN18829_c0_g1_i1.p1	type:complete gc:universal TRINITY_DN18829_c0_g1_i1:24-1019(+)	False	0.00167364	3.15647	4.53172	2	2	1	1	331	35.51	7.11	High	High	Not Found	Not Found	Not Found	Not Found	Not Found	Not Found	Not Found	Not Found	Not Found	Not Found	High	High		8.31418	2
False	High	IsMasterProtein	TRINITY_DN16234_c0_g1_i1.p1	type:5prime_partial gc:universal TRINITY_DN16234_c0_g1_i1:1-1860(+)	False	0.00167364	3.14877	3.55412	2	2	2	1	619	71.321	7.94	Not Found	Not Found	Not Found	High	Not Found	Not Found	High	Not Found	Not Found	Not Found	Not Found	Not Found	Not Found	Not Found		1.62072	2
False	High	IsMasterProtein	TRINITY_DN7194_c0_g1_i3.p1	type:complete gc:universal TRINITY_DN7194_c0_g1_i3:3138-1480(-)	False	0.00167364	3.10818	1.81159	1	2	1	1	552	63.25	7.68	Not Found	Not Found	Not Found	Not Found	Not Found	Not Found	High	High	Not Found	Not Found	Not Found	Not Found	Not Found	Not Found		1.77351	1
False	High	IsMasterProtein	TRINITY_DN6184_c0_g1_i5.p1	type:5prime_partial gc:universal TRINITY_DN6184_c0_g1_i5:2532-418(-)	False	0.00167364	3.10166	1.5625	1	2	1	1	704	81.202	6.3	Not Found	Not Found	High	High	Not Found	Not Found	Not Found	Not Found	Not Found	Not Found	Not Found	Not Found	Not Found	Not Found		5.57921	1
False	High	IsMasterProtein	TRINITY_DN1158_c0_g1_i19.p1	type:complete gc:universal TRINITY_DN1158_c0_g1_i19:2178-889(-)	False	0.00167364	3.10084	2.0979	1	2	1	1	429	48.252	7.3	High	Not Found	Not Found	Not Found	Not Found	Not Found	Not Found	Not Found	High	Not Found	Not Found	Not Found	Not Found	Not Found		4.77586	1
False	High	IsMasterProtein	TRINITY_DN4722_c0_g2_i1.p1	type:complete gc:universal TRINITY_DN4722_c0_g2_i1:21-887(+)	False	0.00167364	3.0927	3.81944	1	2	1	1	288	30.152	7.62	Not Found	Not Found	Not Found	Not Found	High	High	Not Found	Not Found	Not Found	Not Found	Not Found	Not Found	Not Found	Not Found		4.90244	1
False	High	IsMasterProtein	TRINITY_DN12578_c0_g1_i2.p1	type:complete gc:universal TRINITY_DN12578_c0_g1_i2:223-1152(+)	False	0.00167364	3.09146	6.79612	1	2	1	1	309	35.471	5.64	High	Not Found	Not Found	Not Found	Not Found	Not Found	Not Found	Not Found	Not Found	Not Found	Not Found	Not Found	Not Found	Not Found		3.24768	1
False	High	IsMasterProtein	TRINITY_DN6499_c0_g1_i1.p1	type:3prime_partial gc:universal TRINITY_DN6499_c0_g1_i1:965-3(-)	False	0.00167364	3.07826	2.80374	1	2	1	1	321	35.573	6.54	Not Found	Not Found	Not Found	Not Found	Not Found	High	Not Found	High	Not Found	Not Found	High	Not Found	Not Found	Not Found		6.70995	1
False	High	IsMasterProtein	TRINITY_DN7909_c0_g1_i6.p1	type:5prime_partial gc:universal TRINITY_DN7909_c0_g1_i6:3-1406(+)	False	0.00167364	3.07368	3.21199	2	2	2	1	467	51.344	8.35	High	High	Not Found	Not Found	Not Found	Not Found	Not Found	Not Found	Not Found	Not Found	Not Found	Not Found	Not Found	Not Found		5.86347	2
False	High	IsMasterProtein	TRINITY_DN7571_c0_g1_i1.p1	type:complete gc:universal TRINITY_DN7571_c0_g1_i1:155-1264(+)	False	0.00167364	3.06814	3.52304	1	2	1	1	369	41.146	6.05	Not Found	Not Found	Not Found	Not Found	Not Found	Not Found	Not Found	Not Found	Not Found	Not Found	High	High	Not Found	Not Found		0	1
False	High	IsMasterProtein	TRINITY_DN108_c0_g1_i10.p1	type:complete gc:universal TRINITY_DN108_c0_g1_i10:2202-718(-)	False	0.00167364	3.05859	2.42915	1	2	1	1	494	56.859	8.02	Not Found	Not Found	Not Found	High	Not Found	Not Found	High	Not Found	Not Found	Not Found	Not Found	Not Found	Not Found	Not Found		4.40475	1
False	High	IsMasterProtein	Cont_Q3SYV4	Adenylyl cyclase-associated protein 1 OS=Bos taurus OX=9913 GN=CAP1 PE=2 SV=3	True	0.00167364	3.05789	3.81356	1	2	1	1	472	51.24	7.52	Not Found	High	Not Found	Not Found	Not Found	Not Found	Not Found	Not Found	Not Found	Not Found	Not Found	Not Found	Not Found	Not Found		2.90942	1
False	High	IsMasterProtein	TRINITY_DN3407_c0_g1_i11.p1	type:complete gc:universal TRINITY_DN3407_c0_g1_i11:2570-1323(-)	False	0.00167364	3.05606	1.92771	1	2	1	1	415	44.659	6.06	High	High	Not Found	Not Found	Not Found	Not Found	Not Found	Not Found	Not Found	Not Found	Not Found	Not Found	High	High		4.35162	1
False	High	IsMasterProtein	TRINITY_DN8027_c0_g1_i24.p1	type:5prime_partial gc:universal TRINITY_DN8027_c0_g1_i24:1-1158(+)	False	0.00167364	3.05232	2.85714	1	2	1	1	385	45.288	6.61	Not Found	Not Found	Not Found	Not Found	High	High	Not Found	Not Found	Not Found	Not Found	High	Not Found	Not Found	Not Found		8.11549	1
False	High	IsMasterProtein	TRINITY_DN5294_c0_g1_i1.p1	type:complete gc:universal TRINITY_DN5294_c0_g1_i1:91-1965(+)	False	0.00167364	3.04422	2.08333	1	2	1	1	624	72.066	8.05	High	High	Not Found	Not Found	Not Found	Not Found	Not Found	Not Found	Not Found	Not Found	Not Found	Not Found	Not Found	Not Found		4.97854	1
False	High	IsMasterProtein	TRINITY_DN1179_c0_g1_i3.p1	type:3prime_partial gc:universal TRINITY_DN1179_c0_g1_i3:2784-1(-)	False	0.00167364	3.0411	1.2931	1	2	1	1	928	102.124	5.69	High	Not Found	Not Found	Not Found	Not Found	Not Found	Not Found	Not Found	Not Found	Not Found	Not Found	Not Found	Not Found	Not Found		2.18017	1
False	High	IsMasterProtein	TRINITY_DN1359_c0_g1_i10.p1	type:5prime_partial gc:universal TRINITY_DN1359_c0_g1_i10:2-1675(+)	False	0.00167364	3.03806	1.6158	1	2	1	1	557	61.486	4.97	Not Found	Not Found	High	Not Found	Not Found	Not Found	Not Found	High	Not Found	Not Found	Not Found	Not Found	Not Found	Not Found		5.36264	1
False	High	IsMasterProtein	TRINITY_DN9767_c0_g1_i1.p1	type:complete gc:universal TRINITY_DN9767_c0_g1_i1:211-699(+)	False	0.00167364	3.02632	9.87654	1	2	1	1	162	17.692	7.72	High	High	Not Found	Not Found	Not Found	Not Found	Not Found	Not Found	High	High	Not Found	Not Found	Not Found	Not Found		9.00264	1
False	High	IsMasterProtein	TRINITY_DN4609_c0_g1_i1.p1	type:complete gc:universal TRINITY_DN4609_c0_g1_i1:2245-104(-)	False	0.00167364	3.00846	1.68303	1	2	1	1	713	78.517	6.8	Not Found	Not Found	Not Found	Not Found	Not Found	Not Found	High	Not Found	Not Found	Not Found	Not Found	Not Found	Not Found	Not Found		2.76733	1
False	High	IsMasterProtein	TRINITY_DN17819_c0_g1_i1.p1	type:3prime_partial gc:universal TRINITY_DN17819_c0_g1_i1:1198-2(-)	False	0.00167364	3.00695	4.7619	2	2	2	1	399	44.951	5.49	Not Found	Not Found	High	High	Not Found	Not Found	Not Found	Not Found	Not Found	Not Found	Not Found	Not Found	Not Found	Not Found		3.85822	2
False	High	IsMasterProtein	TRINITY_DN1276_c0_g1_i15.p2	type:complete gc:universal TRINITY_DN1276_c0_g1_i15:5417-4629(-)	False	0.00167364	3.00318	3.43511	1	2	1	1	262	29.879	5.12	Not Found	Not Found	Not Found	Not Found	Not Found	Not Found	Not Found	Not Found	Not Found	Not Found	Not Found	Not Found	High	Not Found		2.01661	1
False	High	IsMasterProtein	Cont_P00698	Lysozyme C OS=Gallus gallus OX=9031 GN=LYZ PE=1 SV=1	True	0.00167364	2.96497	10.8844	1	2	1	1	147	16.228	9.07	Not Found	High	Not Found	Not Found	Not Found	Not Found	Not Found	Not Found	Not Found	Not Found	Not Found	Not Found	Not Found	Not Found		2.30289	1
False	High	IsMasterProtein	TRINITY_DN7248_c0_g1_i10.p1	type:complete gc:universal TRINITY_DN7248_c0_g1_i10:165-1463(+)	False	0.00167364	2.96457	2.08333	1	2	1	1	432	47.227	6.35	Not Found	Not Found	Not Found	Not Found	High	Not Found	High	High	Not Found	Not Found	High	High	Not Found	Not Found		10.713	1
False	High	IsMasterProtein	TRINITY_DN20635_c0_g1_i12.p1	type:complete gc:universal TRINITY_DN20635_c0_g1_i12:666-52(-)	False	0.00167364	2.95975	6.86275	2	2	2	1	204	23.348	10.89	Not Found	Not Found	High	Not Found	Not Found	Not Found	Not Found	Not Found	High	Not Found	High	High	Not Found	Not Found		5.54146	2
False	High	IsMasterProtein	TRINITY_DN5840_c0_g1_i6.p1	type:complete gc:universal TRINITY_DN5840_c0_g1_i6:752-177(-)	False	0.00167364	2.95664	4.18848	1	2	1	1	191	20.674	7.55	Not Found	Not Found	Not Found	Not Found	Not Found	Not Found	Not Found	Not Found	High	High	Not Found	Not Found	Not Found	High		1.6763	1
False	High	IsMasterProtein	TRINITY_DN10370_c0_g1_i1.p1	type:complete gc:universal TRINITY_DN10370_c0_g1_i1:953-204(-)	False	0.00167364	2.95156	3.61446	1	2	1	1	249	27.386	4.96	Not Found	Not Found	Not Found	Not Found	High	High	Not Found	Not Found	Not Found	Not Found	Not Found	Not Found	Not Found	Not Found		3.67245	1
False	High	IsMasterProtein	TRINITY_DN2413_c0_g1_i3.p1	type:complete gc:universal TRINITY_DN2413_c0_g1_i3:658-119(-)	False	0.00167364	2.94082	4.46927	1	2	1	1	179	19.618	9.63	Not Found	High	Not Found	Not Found	Not Found	Not Found	Not Found	Not Found	Not Found	Not Found	Not Found	Not Found	Not Found	Not Found		2.09439	1
False	High	IsMasterProtein	TRINITY_DN1540_c0_g1_i1.p1	type:complete gc:universal TRINITY_DN1540_c0_g1_i1:3291-2302(-)	False	0.00167364	2.92775	2.43161	1	2	1	1	329	36.603	9.09	Not Found	Not Found	Not Found	Not Found	Not Found	High	Not Found	Not Found	High	Not Found	High	Not Found	Not Found	High		7.3475	1
False	High	IsMasterProtein	TRINITY_DN319_c1_g1_i10.p1	type:complete gc:universal TRINITY_DN319_c1_g1_i10:2924-255(-)	False	0.00167364	2.92263	1.23735	1	2	1	1	889	98.411	6.51	Not Found	Not Found	High	High	High	High	High	Not Found	Not Found	Not Found	High	High	Not Found	Not Found		10.1003	1
False	High	IsMasterProtein	TRINITY_DN894_c0_g3_i1.p1	type:complete gc:universal TRINITY_DN894_c0_g3_i1:112-1239(+)	False	0.00167364	2.90518	2.66667	1	2	1	1	375	43.121	7.47	Not Found	Not Found	Not Found	Not Found	Not Found	Not Found	Not Found	Not Found	High	High	Not Found	Not Found	Not Found	Not Found		3.67663	1
False	High	IsMasterProtein	TRINITY_DN16556_c0_g1_i1.p1	type:complete gc:universal TRINITY_DN16556_c0_g1_i1:6133-3302(-)	False	0.00167364	2.88041	1.16649	1	2	1	1	943	106.55	6.3	Not Found	High	Not Found	Not Found	Not Found	Not Found	Not Found	Not Found	Not Found	Not Found	Not Found	Not Found	Not Found	Not Found		1.83228	1
False	High	IsMasterProtein	TRINITY_DN1026_c0_g1_i14.p1	type:5prime_partial gc:universal TRINITY_DN1026_c0_g1_i14:801-190(-)	False	0.00167364	2.85855	7.38916	1	2	1	1	203	21.125	9.67	Not Found	Not Found	High	High	Not Found	Not Found	Not Found	Not Found	Not Found	Not Found	High	Not Found	Not Found	Not Found		8.41238	1
False	High	IsMasterProtein	TRINITY_DN32232_c0_g1_i1.p1	type:complete gc:universal TRINITY_DN32232_c0_g1_i1:203-1639(+)	False	0.00167364	2.85356	2.92887	1	2	1	1	478	56.173	8.66	Not Found	Not Found	Not Found	Not Found	Not Found	Not Found	Not Found	Not Found	High	High	Not Found	Not Found	Not Found	Not Found		4.9263	1
False	High	IsMasterProtein	TRINITY_DN3573_c0_g1_i6.p1	type:5prime_partial gc:universal TRINITY_DN3573_c0_g1_i6:552-181(-)	False	0.00167364	2.8514	6.50407	1	2	1	1	123	14.031	9.91	Not Found	Not Found	Not Found	Not Found	High	High	Not Found	Not Found	Not Found	Not Found	High	Not Found	Not Found	Not Found		3.69944	1
False	High	IsMasterProtein	TRINITY_DN69429_c0_g1_i1.p1	type:5prime_partial gc:universal TRINITY_DN69429_c0_g1_i1:1-399(+)	False	0.00167364	2.84129	9.84848	1	2	1	1	132	14.592	6.8	Not Found	Not Found	Not Found	High	Not Found	Not Found	Not Found	Not Found	Not Found	Not Found	Not Found	Not Found	Not Found	Not Found		1.6684	1
False	High	IsMasterProtein	Cont_P01012	Ovalbumin OS=Gallus gallus OX=9031 GN=SERPINB14 PE=1 SV=2	True	0.00167364	2.83505	4.14508	1	2	1	1	386	42.854	5.29	Not Found	Not Found	Not Found	Not Found	Not Found	High	Not Found	Not Found	Not Found	Not Found	Not Found	Not Found	Not Found	Not Found		2.49839	1
False	High	IsMasterProtein	TRINITY_DN556_c0_g1_i1.p1	type:complete gc:universal TRINITY_DN556_c0_g1_i1:130-1272(+)	False	0.00167364	2.83416	3.68421	1	2	1	1	380	42.806	5.35	Not Found	Not Found	Not Found	Not Found	Not Found	Not Found	Not Found	Not Found	Not Found	Not Found	High	High	Not Found	Not Found		0	1
False	High	IsMasterProtein	TRINITY_DN4392_c0_g1_i3.p1	type:complete gc:universal TRINITY_DN4392_c0_g1_i3:890-138(-)	False	0.00167364	2.82652	3.6	1	2	1	1	250	29.445	9.69	Not Found	High	Not Found	Not Found	Not Found	Not Found	Not Found	Not Found	High	Not Found	Not Found	Not Found	High	Not Found		7.14607	1
False	High	IsMasterProtein	TRINITY_DN1151_c0_g1_i10.p1	type:3prime_partial gc:universal TRINITY_DN1151_c0_g1_i10:1126-2(-)	False	0.00167364	2.82045	4.26667	1	2	1	1	375	40.69	4.49	Not Found	Not Found	Not Found	Not Found	Not Found	Not Found	Not Found	Not Found	Not Found	Not Found	High	Not Found	Not Found	Not Found		2.69468	1
False	High	IsMasterProtein	TRINITY_DN7567_c0_g1_i1.p1	type:5prime_partial gc:universal TRINITY_DN7567_c0_g1_i1:2117-669(-)	False	0.00167364	2.79942	2.28216	1	2	1	1	482	53.77	8.32	Not Found	Not Found	High	High	High	High	Not Found	Not Found	Not Found	Not Found	High	Not Found	Not Found	Not Found		6.40523	1
False	High	IsMasterProtein	TRINITY_DN9826_c0_g1_i2.p1	type:3prime_partial gc:universal TRINITY_DN9826_c0_g1_i2:980-3(-)	False	0.00167364	2.77314	4.60123	1	2	1	1	326	35.533	6.52	Not Found	Not Found	Not Found	Not Found	Not Found	Not Found	Not Found	Not Found	Not Found	Not Found	Not Found	High	Not Found	Not Found		2.50658	1
False	High	IsMasterProtein	TRINITY_DN4954_c0_g1_i2.p1	type:complete gc:universal TRINITY_DN4954_c0_g1_i2:1212-85(-)	False	0.00167364	2.76777	2.66667	1	2	1	1	375	42.269	6.29	Not Found	Not Found	Not Found	Not Found	Not Found	Not Found	Not Found	Not Found	Not Found	Not Found	High	High	Not Found	Not Found		4.77553	1
False	High	IsMasterProtein	TRINITY_DN20217_c0_g1_i1.p1	type:5prime_partial gc:universal TRINITY_DN20217_c0_g1_i1:2-391(+)	False	0.00167364	2.75671	6.97674	1	2	1	1	129	14.298	10.51	Not Found	Not Found	High	High	Not Found	High	High	High	High	High	High	High	Not Found	High		16.5309	1
False	High	IsMasterProtein	TRINITY_DN1136_c0_g1_i10.p1	type:complete gc:universal TRINITY_DN1136_c0_g1_i10:201-3245(+)	False	0.00167364	2.734	1.67653	1	2	1	1	1014	116.202	6.9	Not Found	Not Found	High	High	Not Found	Not Found	Not Found	Not Found	Not Found	Not Found	Not Found	Not Found	Not Found	Not Found		4.94117	1
False	High	IsMasterProtein	TRINITY_DN1799_c0_g1_i10.p1	type:5prime_partial gc:universal TRINITY_DN1799_c0_g1_i10:1139-771(-)	False	0.00167364	2.72677	7.37705	1	2	1	1	122	13.188	8.02	Not Found	High	Not Found	Not Found	High	Not Found	High	Not Found	Not Found	Not Found	Not Found	Not Found	Not Found	Not Found		1.84185	1
False	High	IsMasterProtein	TRINITY_DN1550_c1_g1_i1.p1	type:3prime_partial gc:universal TRINITY_DN1550_c1_g1_i1:60-464(+)	False	0.00167364	2.72561	6.66667	1	2	1	1	135	14.464	5.07	Not Found	Not Found	Not Found	Not Found	Not Found	Not Found	Not Found	Not Found	Not Found	Not Found	Not Found	Not Found	Not Found	High		0	1
False	High	IsMasterProtein	TRINITY_DN3029_c1_g1_i1.p1	type:complete gc:universal TRINITY_DN3029_c1_g1_i1:1790-114(-)	False	0.00167364	2.6874	1.79211	1	2	1	1	558	62.21	6.24	Not Found	Not Found	Not Found	Not Found	Not Found	Not Found	Not Found	High	Not Found	Not Found	Not Found	Not Found	Not Found	Not Found		1.8063	1
False	High	IsMasterProtein	TRINITY_DN1371_c0_g1_i3.p1	type:complete gc:universal TRINITY_DN1371_c0_g1_i3:1725-43(-)	False	0.00167364	2.66514	2.5	1	2	1	1	560	63.307	7.23	Not Found	Not Found	Not Found	Not Found	Not Found	Not Found	Not Found	High	Not Found	Not Found	Not Found	Not Found	Not Found	Not Found		2.4166	1
False	High	IsMasterProtein	TRINITY_DN17328_c0_g1_i1.p1	type:complete gc:universal TRINITY_DN17328_c0_g1_i1:1510-98(-)	False	0.00167364	2.64417	1.70213	1	2	1	1	470	53.104	6.52	Not Found	Not Found	Not Found	Not Found	Not Found	Not Found	Not Found	Not Found	Not Found	High	Not Found	Not Found	Not Found	Not Found		1.97403	1
False	High	IsMasterProtein	TRINITY_DN2769_c0_g1_i1.p1	type:complete gc:universal TRINITY_DN2769_c0_g1_i1:87-1484(+)	False	0.00242718	2.63414	2.7957	1	2	1	1	465	54.115	8.82	Not Found	Not Found	Not Found	Not Found	High	Not Found	Not Found	Not Found	Not Found	Not Found	High	Not Found	Not Found	Not Found		1.69059	1
False	High	IsMasterProtein	TRINITY_DN2154_c0_g1_i1.p1	type:complete gc:universal TRINITY_DN2154_c0_g1_i1:1888-1235(-)	False	0.00242718	2.62782	5.06912	1	2	1	1	217	25.098	6.8	Not Found	Not Found	Not Found	Not Found	Not Found	Not Found	Not Found	Not Found	Not Found	Not Found	Not Found	High	Not Found	Not Found		1.79335	1
False	High	IsMasterProtein	TRINITY_DN3263_c0_g1_i3.p1	type:5prime_partial gc:universal TRINITY_DN3263_c0_g1_i3:1-1629(+)	False	0.00242718	2.60276	2.21402	1	2	1	1	542	59.694	6.42	High	High	Not Found	Not Found	Not Found	Not Found	Not Found	Not Found	Not Found	Not Found	Not Found	Not Found	Not Found	High		3.84201	1
False	High	IsMasterProtein	TRINITY_DN282_c1_g2_i1.p1	type:5prime_partial gc:universal TRINITY_DN282_c1_g2_i1:3-1544(+)	False	0.00242718	2.59929	1.55945	1	2	1	1	513	59.191	7.3	Not Found	Not Found	High	Not Found	Not Found	Not Found	High	High	Not Found	Not Found	Not Found	Not Found	Not Found	Not Found		6.64726	1
False	High	IsMasterProtein	TRINITY_DN3223_c0_g1_i12.p1	type:complete gc:universal TRINITY_DN3223_c0_g1_i12:1314-115(-)	False	0.00242718	2.59448	2.75689	1	2	1	1	399	47.294	8.51	Not Found	Not Found	High	High	Not Found	Not Found	Not Found	Not Found	Not Found	Not Found	Not Found	Not Found	Not Found	Not Found		6.26603	1
False	High	IsMasterProtein	TRINITY_DN5273_c1_g1_i1.p1	type:complete gc:universal TRINITY_DN5273_c1_g1_i1:92-1219(+)	False	0.00242718	2.56703	2.13333	1	2	1	1	375	42.232	7.25	Not Found	Not Found	Not Found	Not Found	Not Found	Not Found	Not Found	Not Found	High	High	Not Found	Not Found	Not Found	Not Found		3.88288	1
False	High	IsMasterProtein	TRINITY_DN342_c0_g1_i7.p1	type:complete gc:universal TRINITY_DN342_c0_g1_i7:274-768(+)	False	0.00242718	2.55783	5.4878	1	2	1	1	164	17.611	9.67	Not Found	Not Found	Not Found	Not Found	Not Found	Not Found	Not Found	Not Found	High	High	High	High	Not Found	High		11.2195	1
False	High	IsMasterProtein	TRINITY_DN4066_c0_g1_i1.p1	type:complete gc:universal TRINITY_DN4066_c0_g1_i1:1696-50(-)	False	0.00242718	2.55502	4.74453	1	2	1	1	548	60.918	6.65	Not Found	Not Found	High	High	Not Found	Not Found	High	Not Found	Not Found	Not Found	Not Found	Not Found	Not Found	Not Found		8.22821	1
False	High	IsMasterProtein	TRINITY_DN723_c0_g1_i1.p1	type:complete gc:universal TRINITY_DN723_c0_g1_i1:108-1055(+)	False	0.00242718	2.54424	2.85714	1	2	1	1	315	34.282	7.44	Not Found	Not Found	Not Found	Not Found	Not Found	Not Found	Not Found	Not Found	Not Found	Not Found	High	High	Not Found	Not Found		4.33963	1
False	High	IsMasterProtein	TRINITY_DN17550_c0_g1_i2.p1	type:complete gc:universal TRINITY_DN17550_c0_g1_i2:182-1066(+)	False	0.00242718	2.52129	3.40136	1	2	1	1	294	31.214	6.76	Not Found	High	Not Found	Not Found	High	High	High	High	High	High	High	High	Not Found	Not Found		7.87281	1
False	High	IsMasterProtein	TRINITY_DN4764_c0_g1_i1.p1	type:complete gc:universal TRINITY_DN4764_c0_g1_i1:212-2914(+)	False	0.00242718	2.50501	1	1	2	1	1	900	102.551	7.65	Not Found	Not Found	High	Not Found	Not Found	Not Found	Not Found	Not Found	Not Found	Not Found	Not Found	Not Found	Not Found	Not Found		2.44303	1
False	High	IsMasterProtein	TRINITY_DN2172_c0_g1_i2.p1	type:complete gc:universal TRINITY_DN2172_c0_g1_i2:216-1211(+)	False	0.00242718	2.50321	3.32326	1	2	1	1	331	35.22	10.17	High	High	Not Found	Not Found	Not Found	Not Found	Not Found	Not Found	Not Found	High	Not Found	Not Found	Not Found	Not Found		6.00083	1
False	High	IsMasterProtein	TRINITY_DN32049_c0_g1_i1.p4	type:5prime_partial gc:universal TRINITY_DN32049_c0_g1_i1:573-238(-)	False	0.00242718	2.49214	13.5135	1	2	1	1	111	11.906	8.62	Not Found	High	Not Found	Not Found	Not Found	Not Found	Not Found	High	Not Found	Not Found	Not Found	Not Found	Not Found	Not Found		1.97704	1
False	High	IsMasterProtein	TRINITY_DN632_c0_g1_i10.p1	type:5prime_partial gc:universal TRINITY_DN632_c0_g1_i10:1-1182(+)	False	0.00242718	2.49093	3.05344	1	2	1	1	393	40.501	5.27	Not Found	Not Found	High	Not Found	Not Found	Not Found	Not Found	High	Not Found	Not Found	Not Found	Not Found	Not Found	Not Found		1.90255	1
False	High	IsMasterProtein	TRINITY_DN1655_c0_g1_i4.p1	type:complete gc:universal TRINITY_DN1655_c0_g1_i4:1738-44(-)	False	0.00242718	2.48201	2.30496	1	2	1	1	564	64.442	8.54	High	Not Found	Not Found	Not Found	Not Found	Not Found	Not Found	Not Found	Not Found	Not Found	Not Found	Not Found	Not Found	Not Found		0	1
False	High	IsMasterProtein	TRINITY_DN1913_c0_g1_i3.p1	type:complete gc:universal TRINITY_DN1913_c0_g1_i3:159-2018(+)	False	0.00242718	2.4598	2.42326	1	2	1	1	619	68.887	7.01	Not Found	Not Found	Not Found	Not Found	Not Found	Not Found	Not Found	Not Found	Not Found	Not Found	High	Not Found	Not Found	Not Found		0	1
False	High	IsMasterProtein	TRINITY_DN56727_c0_g1_i1.p1	type:complete gc:universal TRINITY_DN56727_c0_g1_i1:101-841(+)	False	0.00242718	2.45817	4.06504	1	2	1	1	246	27.621	9.57	Not Found	Not Found	Not Found	Not Found	Not Found	Not Found	Not Found	High	Not Found	Not Found	Not Found	Not Found	Not Found	Not Found		1.64838	1
False	High	IsMasterProtein	TRINITY_DN7402_c0_g2_i3.p1	type:complete gc:universal TRINITY_DN7402_c0_g2_i3:260-1177(+)	False	0.00242718	2.44141	3.93443	1	2	1	1	305	33.401	9.25	High	High	Not Found	Not Found	Not Found	Not Found	Not Found	Not Found	Not Found	High	Not Found	Not Found	Not Found	Not Found		5.54828	1
False	High	IsMasterProtein	TRINITY_DN5913_c0_g1_i1.p1	type:complete gc:universal TRINITY_DN5913_c0_g1_i1:466-71(-)	False	0.00242718	2.40938	9.92366	1	2	1	1	131	14.385	10.01	Not Found	High	Not Found	High	Not Found	Not Found	Not Found	Not Found	Not Found	High	Not Found	Not Found	Not Found	High		9.70993	1
False	High	IsMasterProtein	TRINITY_DN4402_c0_g1_i3.p1	type:complete gc:universal TRINITY_DN4402_c0_g1_i3:2386-1220(-)	False	0.00318218	2.36241	2.83505	1	2	1	1	388	44.004	8.37	Not Found	Not Found	Not Found	Not Found	Not Found	High	Not Found	Not Found	Not Found	Not Found	Not Found	Not Found	Not Found	Not Found		1.78822	1
False	High	IsMasterProtein	TRINITY_DN5942_c0_g1_i5.p1	type:complete gc:universal TRINITY_DN5942_c0_g1_i5:177-1895(+)	False	0.00318218	2.34285	2.27273	1	2	1	1	572	64.087	9.25	Not Found	Not Found	Not Found	Not Found	Not Found	Not Found	Not Found	Not Found	Not Found	Not Found	Not Found	High	Not Found	Not Found		2.20885	1
False	High	IsMasterProtein	TRINITY_DN26923_c1_g1_i6.p1	type:complete gc:universal TRINITY_DN26923_c1_g1_i6:619-38(-)	False	0.00318218	2.31785	7.25389	1	2	1	1	193	22.096	10.17	Not Found	Not Found	High	Not Found	Not Found	Not Found	Not Found	Not Found	Not Found	Not Found	Not Found	Not Found	Not Found	Not Found		2.66606	1
False	High	IsMasterProtein	TRINITY_DN679_c0_g1_i4.p1	type:complete gc:universal TRINITY_DN679_c0_g1_i4:311-826(+)	False	0.00318218	2.30839	4.09357	1	2	1	1	171	18.593	6.77	High	High	High	Not Found	High	High	Not Found	Not Found	High	High	Not Found	Not Found	High	Not Found		7.62026	1
False	High	IsMasterProtein	TRINITY_DN3576_c0_g1_i1.p1	type:complete gc:universal TRINITY_DN3576_c0_g1_i1:1249-119(-)	False	0.00318218	2.30566	2.12766	1	2	1	1	376	39.951	6.99	Not Found	Not Found	High	High	Not Found	Not Found	Not Found	Not Found	Not Found	Not Found	Not Found	Not Found	Not Found	Not Found		3.75837	1
False	High	IsMasterProtein	TRINITY_DN2289_c0_g2_i1.p1	type:5prime_partial gc:universal TRINITY_DN2289_c0_g2_i1:3-1529(+)	False	0.00318218	2.30522	1.9685	1	2	1	1	508	57.952	8.94	Not Found	Not Found	Not Found	High	Not Found	Not Found	Not Found	Not Found	Not Found	Not Found	Not Found	Not Found	Not Found	Not Found		2.64195	1
False	High	IsMasterProtein	TRINITY_DN3504_c0_g1_i3.p1	type:complete gc:universal TRINITY_DN3504_c0_g1_i3:261-2519(+)	False	0.00318218	2.29973	2.12766	1	2	1	1	752	85.744	6.32	Not Found	Not Found	Not Found	High	Not Found	Not Found	Not Found	Not Found	Not Found	Not Found	Not Found	Not Found	Not Found	Not Found		2.05009	1
False	High	IsMasterProtein	TRINITY_DN8923_c0_g1_i12.p1	type:complete gc:universal TRINITY_DN8923_c0_g1_i12:4511-1155(-)	False	0.00318218	2.29628	0.626118	1	2	1	1	1118	126.674	7.83	Not Found	High	High	High	Not Found	Not Found	Not Found	High	Not Found	High	Not Found	Not Found	Not Found	Not Found		9.85951	1
False	High	IsMasterProtein	TRINITY_DN25847_c0_g1_i5.p1	type:5prime_partial gc:universal TRINITY_DN25847_c0_g1_i5:450-46(-)	False	0.00318218	2.29508	5.97015	1	2	1	1	134	15.638	11.36	Not Found	Not Found	Not Found	Not Found	Not Found	Not Found	Not Found	Not Found	Not Found	Not Found	Not Found	Not Found	Not Found	High		1.99393	1
False	High	IsMasterProtein	TRINITY_DN4005_c0_g1_i3.p1	type:complete gc:universal TRINITY_DN4005_c0_g1_i3:1638-247(-)	False	0.00318218	2.2871	1.72786	1	2	1	1	463	52.357	7.96	Not Found	Not Found	Not Found	Not Found	Not Found	Not Found	Not Found	Not Found	Not Found	Not Found	Not Found	High	Not Found	Not Found		2.17782	1
False	High	IsMasterProtein	TRINITY_DN22_c0_g1_i7.p2	type:complete gc:universal TRINITY_DN22_c0_g1_i7:315-956(+)	False	0.00395883	2.27262	3.75587	1	2	1	1	213	24.287	7.93	Not Found	Not Found	Not Found	Not Found	Not Found	Not Found	Not Found	Not Found	Not Found	Not Found	High	Not Found	Not Found	Not Found		1.63943	1
False	High	IsMasterProtein	TRINITY_DN930_c0_g1_i9.p1	type:complete gc:universal TRINITY_DN930_c0_g1_i9:2171-828(-)	False	0.00395883	2.26209	3.13199	1	2	1	1	447	48.893	5.74	Not Found	High	Not Found	Not Found	Not Found	Not Found	Not Found	Not Found	Not Found	Not Found	Not Found	Not Found	High	Not Found		0	1
False	High	IsMasterProtein	TRINITY_DN4970_c0_g2_i4.p1	type:complete gc:universal TRINITY_DN4970_c0_g2_i4:166-822(+)	False	0.00395883	2.26027	4.58716	1	2	1	1	218	24.919	6.06	High	High	Not Found	Not Found	High	High	Not Found	Not Found	High	Not Found	Not Found	Not Found	Not Found	Not Found		9.1349	1
False	High	IsMasterProtein	TRINITY_DN2113_c0_g1_i1.p2	type:complete gc:universal TRINITY_DN2113_c0_g1_i1:296-604(+)	False	0.00395883	2.25251	11.7647	1	2	1	1	102	11.063	9.57	Not Found	Not Found	Not Found	Not Found	Not Found	Not Found	Not Found	Not Found	High	Not Found	Not Found	Not Found	Not Found	Not Found		2.3427	1
False	High	IsMasterProtein	TRINITY_DN1669_c0_g1_i1.p1	type:complete gc:universal TRINITY_DN1669_c0_g1_i1:1307-675(-)	False	0.00474308	2.22952	4.7619	1	2	1	1	210	24.103	8.5	Not Found	Not Found	Not Found	Not Found	Not Found	Not Found	Not Found	Not Found	Not Found	High	Not Found	Not Found	Not Found	Not Found		1.72088	1
False	High	IsMasterProtein	TRINITY_DN13857_c0_g1_i12.p1	type:complete gc:universal TRINITY_DN13857_c0_g1_i12:2710-617(-)	False	0.00538876	2.22069	1.43472	1	1	1	1	697	76.135	9.01	Not Found	Not Found	Not Found	Not Found	Not Found	Not Found	Not Found	Not Found	Not Found	Not Found	Not Found	High	Not Found	Not Found		0	1
False	High	IsMasterProtein	TRINITY_DN1264_c0_g1_i36.p1	type:complete gc:universal TRINITY_DN1264_c0_g1_i36:4456-2834(-)	False	0.00538876	2.22019	1.66667	1	1	1	1	540	58.775	6.29	Not Found	Not Found	Not Found	Not Found	High	Not Found	Not Found	Not Found	Not Found	Not Found	High	High	Not Found	Not Found		1.70135	1
False	High	IsMasterProtein	TRINITY_DN6319_c4_g1_i1.p1	type:complete gc:universal TRINITY_DN6319_c4_g1_i1:68-1507(+)	False	0.00538876	2.21832	2.08768	1	1	1	1	479	54.866	7.2	Not Found	Not Found	Not Found	Not Found	Not Found	Not Found	Not Found	Not Found	Not Found	Not Found	High	High	Not Found	Not Found		3.87432	1
False	High	IsMasterProtein	TRINITY_DN6093_c0_g1_i1.p1	type:complete gc:universal TRINITY_DN6093_c0_g1_i1:841-68(-)	False	0.00538876	2.20705	3.50195	1	1	1	1	257	28.697	6.11	Not Found	Not Found	Not Found	Not Found	High	Not Found	Not Found	Not Found	Not Found	Not Found	Not Found	Not Found	Not Found	Not Found		0	1
False	High	IsMasterProtein	TRINITY_DN2912_c1_g1_i3.p1	type:complete gc:universal TRINITY_DN2912_c1_g1_i3:484-38(-)	False	0.00538876	2.20391	5.40541	1	1	1	1	148	16.419	10.64	Not Found	Not Found	Not Found	Not Found	Not Found	Not Found	Not Found	Not Found	High	High	Not Found	Not Found	Not Found	Not Found		3.81371	1
False	High	IsMasterProtein	Cont_P00330	Alcohol dehydrogenase 1 OS=Saccharomyces cerevisiae (strain ATCC 204508 / S288c) OX=559292 GN=ADH1 PE=1 SV=5	True	0.00538876	2.19491	2.29885	1	1	1	1	348	36.826	6.68	High	Not Found	Not Found	Not Found	Not Found	Not Found	Not Found	Not Found	Not Found	Not Found	Not Found	Not Found	Not Found	Not Found		0	1
False	High	IsMasterProtein	TRINITY_DN7475_c0_g1_i1.p1	type:complete gc:universal TRINITY_DN7475_c0_g1_i1:2260-1310(-)	False	0.00538876	2.1928	3.79747	1	1	1	1	316	37.276	8.7	Not Found	High	Not Found	Not Found	Not Found	Not Found	Not Found	Not Found	Not Found	Not Found	Not Found	Not Found	Not Found	Not Found		0	1
False	High	IsMasterProtein	TRINITY_DN1906_c0_g1_i10.p1	type:complete gc:universal TRINITY_DN1906_c0_g1_i10:1342-53(-)	False	0.00538876	2.19057	2.0979	1	1	1	1	429	47.762	9.98	Not Found	High	Not Found	Not Found	Not Found	Not Found	Not Found	Not Found	Not Found	High	Not Found	Not Found	High	Not Found		5.88034	1
False	High	IsMasterProtein	TRINITY_DN265_c0_g1_i2.p1	type:complete gc:universal TRINITY_DN265_c0_g1_i2:277-1542(+)	False	0.00538876	2.17503	1.90024	1	1	1	1	421	48.4	7.03	Not Found	Not Found	Not Found	Not Found	High	Not Found	Not Found	Not Found	Not Found	Not Found	Not Found	Not Found	Not Found	Not Found		0	1
False	High	IsMasterProtein	TRINITY_DN26414_c0_g1_i1.p1	type:3prime_partial gc:universal TRINITY_DN26414_c0_g1_i1:391-2(-)	False	0.00538876	2.17321	6.92308	1	1	1	1	130	14.465	6.15	Not Found	Not Found	Not Found	Not Found	Not Found	Not Found	Not Found	Not Found	Not Found	Not Found	High	Not Found	Not Found	Not Found		0	1
False	High	IsMasterProtein	TRINITY_DN4945_c0_g1_i15.p1	type:5prime_partial gc:universal TRINITY_DN4945_c0_g1_i15:2-2605(+)	False	0.00538876	2.15964	0.807382	1	1	1	1	867	96.057	6.87	Not Found	Not Found	Not Found	Not Found	Not Found	High	Not Found	Not Found	Not Found	Not Found	High	Not Found	Not Found	Not Found		1.64184	1
False	High	IsMasterProtein	TRINITY_DN1894_c0_g1_i1.p1	type:complete gc:universal TRINITY_DN1894_c0_g1_i1:89-748(+)	False	0.00538876	2.15329	4.10959	1	1	1	1	219	24.507	9.31	Not Found	Not Found	Not Found	Not Found	Not Found	Not Found	Not Found	Not Found	High	High	Not Found	Not Found	Not Found	Not Found		5.0232	1
False	High	IsMasterProtein	TRINITY_DN615_c7_g1_i1.p1	type:complete gc:universal TRINITY_DN615_c7_g1_i1:1348-386(-)	False	0.00538876	2.14014	4.0625	1	1	1	1	320	35.365	8.38	Not Found	Not Found	High	High	High	Not Found	Not Found	Not Found	Not Found	Not Found	Not Found	Not Found	Not Found	Not Found		3.74321	1
False	High	IsMasterProtein	TRINITY_DN3102_c0_g1_i1.p1	type:complete gc:universal TRINITY_DN3102_c0_g1_i1:152-961(+)	False	0.00538876	2.13413	4.46097	1	1	1	1	269	30.817	8.19	Not Found	High	Not Found	Not Found	Not Found	Not Found	High	Not Found	High	Not Found	Not Found	Not Found	Not Found	Not Found		6.72073	1
False	High	IsMasterProtein	TRINITY_DN1681_c0_g1_i3.p2	type:complete gc:universal TRINITY_DN1681_c0_g1_i3:3136-1889(-)	False	0.00538876	2.13112	3.37349	1	1	1	1	415	46.664	6.96	Not Found	Not Found	Not Found	Not Found	Not Found	Not Found	Not Found	Not Found	Not Found	Not Found	Not Found	High	Not Found	Not Found		3.55859	1
False	High	IsMasterProtein	TRINITY_DN2449_c0_g1_i3.p1	type:5prime_partial gc:universal TRINITY_DN2449_c0_g1_i3:2664-625(-)	False	0.00538876	2.12563	2.20913	1	1	1	1	679	75.411	8.46	High	Not Found	High	High	Not Found	Not Found	Not Found	Not Found	Not Found	Not Found	Not Found	Not Found	Not Found	Not Found		4.60109	1
False	High	IsMasterProtein	TRINITY_DN218_c0_g1_i1.p1	type:complete gc:universal TRINITY_DN218_c0_g1_i1:106-1455(+)	False	0.00538876	2.12453	2.22717	1	1	1	1	449	49.145	7.62	Not Found	Not Found	Not Found	Not Found	Not Found	Not Found	Not Found	Not Found	Not Found	Not Found	Not Found	High	Not Found	Not Found		2.01841	1
False	High	IsMasterProtein	TRINITY_DN5306_c0_g1_i8.p1	type:complete gc:universal TRINITY_DN5306_c0_g1_i8:283-3054(+)	False	0.00538876	2.11645	0.975081	1	1	1	1	923	107.678	8.91	Not Found	Not Found	Not Found	Not Found	Not Found	Not Found	Not Found	Not Found	Not Found	Not Found	High	Not Found	Not Found	Not Found		1.68348	1
False	High	IsMasterProtein	TRINITY_DN2558_c0_g1_i2.p1	type:5prime_partial gc:universal TRINITY_DN2558_c0_g1_i2:1721-507(-)	False	0.00538876	2.09044	1.73267	1	1	1	1	404	47.057	7.11	Not Found	Not Found	Not Found	Not Found	Not Found	Not Found	High	Not Found	Not Found	Not Found	Not Found	Not Found	High	High		0	1
False	High	IsMasterProtein	Cont_Q9TTJ5	Regucalcin OS=Bos taurus OX=9913 GN=RGN PE=2 SV=1	True	0.00538876	2.08376	5.68562	1	1	1	1	299	33.286	5.77	Not Found	Not Found	Not Found	Not Found	Not Found	Not Found	Not Found	Not Found	High	High	Not Found	Not Found	Not Found	Not Found		3.62039	1
False	High	IsMasterProtein	TRINITY_DN8069_c0_g1_i1.p1	type:complete gc:universal TRINITY_DN8069_c0_g1_i1:95-799(+)	False	0.00538876	2.07686	3.84615	1	1	1	1	234	27.134	9.33	High	High	Not Found	Not Found	Not Found	Not Found	High	High	High	High	Not Found	Not Found	Not Found	Not Found		10.5995	1
False	High	IsMasterProtein	TRINITY_DN727_c0_g1_i1.p1	type:5prime_partial gc:universal TRINITY_DN727_c0_g1_i1:2-2341(+)	False	0.00538876	2.07598	0.898588	1	1	1	1	779	87.221	5.82	Not Found	Not Found	Not Found	Not Found	Not Found	Not Found	Not Found	Not Found	High	High	Not Found	Not Found	Not Found	Not Found		4.10575	1
False	High	IsMasterProtein	TRINITY_DN5257_c0_g1_i3.p1	type:complete gc:universal TRINITY_DN5257_c0_g1_i3:92-3022(+)	False	0.00610687	2.07381	1.33197	1	1	1	1	976	109.612	5.19	Not Found	Not Found	Not Found	High	Not Found	Not Found	Not Found	Not Found	Not Found	Not Found	Not Found	Not Found	Not Found	Not Found		2.21324	1
False	High	IsMasterProtein	TRINITY_DN7225_c0_g1_i13.p1	type:complete gc:universal TRINITY_DN7225_c0_g1_i13:1900-476(-)	False	0.00610687	2.06987	1.89873	1	1	1	1	474	52.295	7.4	Not Found	Not Found	Not Found	Not Found	Not Found	Not Found	Not Found	Not Found	Not Found	Not Found	High	High	Not Found	Not Found		3.58459	1
False	High	IsMasterProtein	TRINITY_DN5055_c0_g1_i1.p1	type:complete gc:universal TRINITY_DN5055_c0_g1_i1:516-61(-)	False	0.00610687	2.05809	7.28477	1	1	1	1	151	16.151	10.46	Not Found	Not Found	High	High	Not Found	Not Found	High	High	High	High	Not Found	Not Found	Not Found	Not Found		12.1394	1
False	High	IsMasterProtein	TRINITY_DN1079_c0_g1_i10.p1	type:5prime_partial gc:universal TRINITY_DN1079_c0_g1_i10:1975-521(-)	False	0.00610687	2.05789	3.30579	1	1	1	1	484	53.318	7.85	High	Not Found	Not Found	Not Found	Not Found	Not Found	Not Found	Not Found	High	Not Found	Not Found	Not Found	Not Found	Not Found		4.37549	1
False	High	IsMasterProtein	TRINITY_DN4698_c0_g1_i9.p1	type:complete gc:universal TRINITY_DN4698_c0_g1_i9:629-1483(+)	False	0.00610687	2.03175	2.8169	1	1	1	1	284	30.467	8.4	Not Found	Not Found	Not Found	Not Found	Not Found	High	Not Found	High	Not Found	Not Found	Not Found	Not Found	Not Found	Not Found		1.6411	1
False	High	IsMasterProtein	TRINITY_DN1542_c0_g1_i25.p1	type:complete gc:universal TRINITY_DN1542_c0_g1_i25:331-819(+)	False	0.00610687	2.0185	4.93827	1	1	1	1	162	17.684	8.91	High	Not Found	Not Found	Not Found	Not Found	High	Not Found	Not Found	High	High	Not Found	Not Found	Not Found	Not Found		1.68555	1
False	High	IsMasterProtein	TRINITY_DN1865_c0_g1_i12.p1	type:complete gc:universal TRINITY_DN1865_c0_g1_i12:3872-1485(-)	False	0.00685453	2.0118	0.880503	1	1	1	1	795	86.767	5.48	High	Not Found	Not Found	Not Found	Not Found	Not Found	Not Found	Not Found	High	Not Found	Not Found	Not Found	Not Found	High		1.74395	1
False	High	IsMasterProtein	Cont_Q29443	Serotransferrin OS=Bos taurus OX=9913 GN=TF PE=2 SV=1	True	0.00685453	1.9897	1.27841	1	1	1	1	704	77.703	7.08	High	High	Not Found	Not Found	Not Found	Not Found	Not Found	Not Found	Not Found	High	Not Found	Not Found	Not Found	Not Found		3.47716	1
False	High	IsMasterProtein	Cont_P02662	Alpha-S1-casein OS=Bos taurus OX=9913 GN=CSN1S1 PE=1 SV=2	True	0.00685453	1.98928	4.6729	1	1	1	1	214	24.513	5.02	Not Found	Not Found	Not Found	High	Not Found	Not Found	Not Found	Not Found	High	High	Not Found	Not Found	Not Found	Not Found		1.73115	1
False	High	IsMasterProtein	TRINITY_DN26250_c0_g1_i2.p3	type:complete gc:universal TRINITY_DN26250_c0_g1_i2:41-370(+)	False	0.00754148	1.97265	6.42202	1	1	1	1	109	12.381	9.99	Not Found	Not Found	Not Found	Not Found	Not Found	Not Found	Not Found	Not Found	High	Not Found	Not Found	Not Found	Not Found	Not Found		1.75414	1
False	High	IsMasterProtein	TRINITY_DN1563_c0_g1_i1.p2	type:complete gc:universal TRINITY_DN1563_c0_g1_i1:3818-2190(-)	False	0.00754148	1.95429	1.10701	1	1	1	1	542	63.339	6.54	Not Found	Not Found	High	High	High	Not Found	Not Found	Not Found	Not Found	Not Found	High	High	Not Found	High		11.0298	1
False	High	IsMasterProtein	TRINITY_DN3327_c0_g1_i1.p1	type:complete gc:universal TRINITY_DN3327_c0_g1_i1:11989-1268(-)	False	0.00754148	1.95273	0.335852	1	1	1	1	3573	388.747	5.15	Not Found	High	Not Found	Not Found	Not Found	Not Found	Not Found	Not Found	Not Found	High	Not Found	Not Found	Not Found	Not Found		4.632	1
False	High	IsMasterProtein	TRINITY_DN3046_c2_g1_i5.p1	type:3prime_partial gc:universal TRINITY_DN3046_c2_g1_i5:1062-1(-)	False	0.00754148	1.93107	3.10734	1	1	1	1	354	40.397	8.29	Not Found	Not Found	High	Not Found	Not Found	Not Found	Not Found	Not Found	Not Found	Not Found	Not Found	Not Found	Not Found	Not Found		2.37584	1
False	High	IsMasterProtein	TRINITY_DN2053_c0_g1_i11.p1	type:complete gc:universal TRINITY_DN2053_c0_g1_i11:114-2369(+)	False	0.00754148	1.923	1.59787	1	1	1	1	751	85.05	8.48	Not Found	Not Found	High	Not Found	Not Found	Not Found	Not Found	Not Found	Not Found	Not Found	Not Found	Not Found	Not Found	Not Found		0	1
False	High	IsMasterProtein	TRINITY_DN8386_c0_g1_i2.p1	type:complete gc:universal TRINITY_DN8386_c0_g1_i2:164-2974(+)	False	0.00754148	1.92227	1.49573	1	1	1	1	936	107.463	7.5	Not Found	Not Found	Not Found	Not Found	Not Found	Not Found	Not Found	Not Found	Not Found	High	Not Found	Not Found	Not Found	Not Found		1.86762	1
False	High	IsMasterProtein	TRINITY_DN4860_c0_g1_i1.p1	type:complete gc:universal TRINITY_DN4860_c0_g1_i1:105-638(+)	False	0.00754148	1.91937	5.64972	1	1	1	1	177	20.906	10.4	Not Found	Not Found	Not Found	Not Found	Not Found	Not Found	Not Found	Not Found	Not Found	Not Found	Not Found	High	Not Found	Not Found		2.44844	1
False	High	IsMasterProtein	TRINITY_DN9957_c0_g1_i7.p1	type:5prime_partial gc:universal TRINITY_DN9957_c0_g1_i7:3-1424(+)	False	0.00754148	1.91757	2.95983	1	1	1	1	473	53.43	6.86	Not Found	Not Found	Not Found	Not Found	Not Found	Not Found	Not Found	Not Found	Not Found	Not Found	High	High	Not Found	Not Found		1.97879	1
False	High	IsMasterProtein	TRINITY_DN5612_c0_g1_i2.p1	type:3prime_partial gc:universal TRINITY_DN5612_c0_g1_i2:97-2859(+)	False	0.00754148	1.91757	0.760043	1	1	1	1	921	102.807	9.35	Not Found	Not Found	Not Found	Not Found	Not Found	Not Found	High	Not Found	Not Found	Not Found	Not Found	Not Found	Not Found	Not Found		1.87672	1
False	High	IsMasterProtein	TRINITY_DN284_c0_g1_i6.p1	type:complete gc:universal TRINITY_DN284_c0_g1_i6:4005-2347(-)	False	0.00816024	1.89654	2.35507	1	1	1	1	552	62.511	5.94	Not Found	Not Found	High	Not Found	Not Found	Not Found	Not Found	Not Found	Not Found	Not Found	Not Found	Not Found	Not Found	Not Found		0	1
False	High	IsMasterProtein	TRINITY_DN3012_c0_g1_i5.p1	type:complete gc:universal TRINITY_DN3012_c0_g1_i5:2086-35(-)	False	0.00816024	1.89177	2.19619	1	1	1	1	683	77.642	9.06	Not Found	Not Found	Not Found	Not Found	Not Found	Not Found	Not Found	Not Found	Not Found	Not Found	High	Not Found	Not Found	Not Found		1.76019	1
False	High	IsMasterProtein	TRINITY_DN21473_c0_g1_i6.p1	type:complete gc:universal TRINITY_DN21473_c0_g1_i6:1814-408(-)	False	0.00816024	1.88074	2.35043	1	1	1	1	468	52.332	6.05	Not Found	Not Found	Not Found	Not Found	Not Found	High	Not Found	Not Found	Not Found	Not Found	Not Found	Not Found	Not Found	Not Found		1.69467	1
False	High	IsMasterProtein	TRINITY_DN274_c0_g1_i6.p1	type:3prime_partial gc:universal TRINITY_DN274_c0_g1_i6:2105-3(-)	False	0.00816024	1.86044	1.71184	1	1	1	1	701	73.578	4.68	Not Found	Not Found	Not Found	Not Found	Not Found	Not Found	Not Found	Not Found	Not Found	Not Found	High	High	Not Found	Not Found		3.99414	1
False	High	IsMasterProtein	TRINITY_DN3222_c0_g1_i2.p1	type:3prime_partial gc:universal TRINITY_DN3222_c0_g1_i2:182-4003(+)	False	0.00816024	1.83298	0.863422	1	1	1	1	1274	141.855	6.8	Not Found	Not Found	Not Found	Not Found	Not Found	Not Found	Not Found	Not Found	Not Found	Not Found	Not Found	High	Not Found	Not Found		1.74854	1
False	High	IsMasterProtein	TRINITY_DN1782_c0_g1_i1.p1	type:complete gc:universal TRINITY_DN1782_c0_g1_i1:1177-761(-)	False	0.00816024	1.803	8.69565	1	1	1	1	138	15.164	9.64	High	Not Found	Not Found	Not Found	Not Found	Not Found	Not Found	Not Found	Not Found	High	Not Found	Not Found	Not Found	High		7.12212	1
False	High	IsMasterProtein	TRINITY_DN1333_c0_g1_i13.p1	type:5prime_partial gc:universal TRINITY_DN1333_c0_g1_i13:3-3707(+)	False	0.00816024	1.78968	0.810373	1	1	1	1	1234	138.213	7.64	Not Found	Not Found	Not Found	Not Found	Not Found	Not Found	Not Found	Not Found	Not Found	Not Found	High	Not Found	Not Found	Not Found		0	1
False	High	IsMasterProtein	TRINITY_DN2195_c0_g1_i2.p1	type:complete gc:universal TRINITY_DN2195_c0_g1_i2:839-54(-)	False	0.00816024	1.78941	2.68199	1	1	1	1	261	28.024	10.45	Not Found	Not Found	Not Found	High	Not Found	Not Found	Not Found	Not Found	Not Found	Not Found	High	Not Found	Not Found	Not Found		1.63688	1
False	High	IsMasterProtein	TRINITY_DN10332_c0_g1_i2.p1	type:3prime_partial gc:universal TRINITY_DN10332_c0_g1_i2:283-7176(+)	False	0.00816024	1.77134	0.826806	1	1	1	1	2298	259.92	5.96	Not Found	Not Found	Not Found	Not Found	Not Found	Not Found	Not Found	High	Not Found	Not Found	Not Found	High	Not Found	Not Found		5.1625	1
False	High	IsMasterProtein	TRINITY_DN5769_c0_g1_i8.p2	type:internal gc:universal TRINITY_DN5769_c0_g1_i8:3-629(+)	False	0.00816024	1.76981	6.2201	1	1	1	1	209	23.046	9.95	Not Found	Not Found	Not Found	Not Found	Not Found	High	Not Found	Not Found	Not Found	Not Found	Not Found	Not Found	Not Found	Not Found		2.42671	1
False	High	IsMasterProtein	TRINITY_DN13838_c0_g1_i8.p1	type:5prime_partial gc:universal TRINITY_DN13838_c0_g1_i8:1-1521(+)	False	0.00816024	1.76853	2.17391	1	1	1	1	506	58.695	9.2	Not Found	High	Not Found	Not Found	Not Found	Not Found	Not Found	Not Found	Not Found	Not Found	Not Found	Not Found	Not Found	Not Found		1.83766	1
False	High	IsMasterProtein	TRINITY_DN7386_c0_g1_i11.p1	type:3prime_partial gc:universal TRINITY_DN7386_c0_g1_i11:1496-3(-)	False	0.00816024	1.76828	3.01205	1	1	1	1	498	54.504	7.44	Not Found	Not Found	Not Found	Not Found	Not Found	Not Found	Not Found	Not Found	Not Found	Not Found	High	High	Not Found	Not Found		5.28563	1
False	High	IsMasterProtein	TRINITY_DN27033_c0_g2_i2.p1	type:5prime_partial gc:universal TRINITY_DN27033_c0_g2_i2:1-333(+)	False	0.00816024	1.75995	12.7273	1	1	1	1	110	12.748	9.22	Not Found	Not Found	Not Found	Not Found	Not Found	Not Found	Not Found	Not Found	Not Found	Not Found	High	Not Found	Not Found	Not Found	Acetyl [N-Term]	1.75895	1
False	High	IsMasterProtein	TRINITY_DN12196_c0_g1_i18.p1	type:complete gc:universal TRINITY_DN12196_c0_g1_i18:1705-551(-)	False	0.00884956	1.74545	4.94792	1	1	1	1	384	41.339	6.92	Not Found	Not Found	Not Found	Not Found	Not Found	Not Found	Not Found	Not Found	Not Found	Not Found	Not Found	High	Not Found	Not Found		2.39917	1
False	High	IsMasterProtein	TRINITY_DN5558_c0_g1_i1.p1	type:complete gc:universal TRINITY_DN5558_c0_g1_i1:1689-352(-)	False	0.00884956	1.7366	2.92135	1	1	1	1	445	52.006	5.94	Not Found	Not Found	Not Found	Not Found	Not Found	Not Found	Not Found	Not Found	Not Found	Not Found	Not Found	High	Not Found	Not Found		1.82234	1
False	High	IsMasterProtein	TRINITY_DN7626_c0_g1_i4.p1	type:complete gc:universal TRINITY_DN7626_c0_g1_i4:1323-85(-)	False	0.00884956	1.73565	1.69903	1	1	1	1	412	45.798	6.74	Not Found	Not Found	Not Found	Not Found	Not Found	Not Found	Not Found	Not Found	High	High	Not Found	Not Found	Not Found	Not Found		3.94353	1
False	High	IsMasterProtein	TRINITY_DN16382_c0_g1_i10.p1	type:internal gc:universal TRINITY_DN16382_c0_g1_i10:3959-3(-)	False	0.00884956	1.72723	0.60652	1	1	1	1	1319	150.804	6.07	High	High	High	High	Not Found	Not Found	Not Found	Not Found	Not Found	High	High	Not Found	Not Found	Not Found		3.28448	1
False	High	IsMasterProtein	TRINITY_DN1319_c0_g1_i10.p1	type:complete gc:universal TRINITY_DN1319_c0_g1_i10:5277-4675(-)	False	0.00884956	1.72033	12.5	1	1	1	1	200	22.858	7.24	High	Not Found	Not Found	Not Found	Not Found	Not Found	Not Found	Not Found	Not Found	Not Found	Not Found	Not Found	Not Found	Not Found		2.48852	1
False	High	IsMasterProtein	TRINITY_DN7649_c0_g1_i2.p1	type:complete gc:universal TRINITY_DN7649_c0_g1_i2:1523-117(-)	False	0.00955882	1.6874	1.49573	1	1	1	1	468	54.366	8.9	Not Found	Not Found	Not Found	Not Found	Not Found	Not Found	Not Found	Not Found	High	Not Found	Not Found	Not Found	Not Found	Not Found		1.7641	1
False	Medium	IsMasterProtein	TRINITY_DN13060_c0_g1_i12.p2	type:complete gc:universal TRINITY_DN13060_c0_g1_i12:2090-966(-)	False	0.0117561	1.67923	2.40642	1	1	1	1	374	42.291	6.65	Not Found	Not Found	Not Found	Not Found	Not Found	Not Found	Not Found	Not Found	Not Found	Not Found	Not Found	High	Not Found	Not Found		1.96144	1
False	Medium	IsMasterProtein	TRINITY_DN2746_c0_g1_i1.p1	type:complete gc:universal TRINITY_DN2746_c0_g1_i1:414-2537(+)	False	0.0132062	1.66575	2.12164	1	1	1	1	707	77.924	6.99	Not Found	Not Found	High	Not Found	Not Found	Not Found	Not Found	Not Found	Not Found	Not Found	Not Found	Not Found	Not Found	Not Found		1.87036	1
False	Medium	IsMasterProtein	TRINITY_DN10895_c0_g1_i13.p1	type:5prime_partial gc:universal TRINITY_DN10895_c0_g1_i13:1617-514(-)	False	0.0132062	1.65404	1.90736	1	1	1	1	367	39.246	6.74	Not Found	Not Found	High	Not Found	Not Found	Not Found	Not Found	Not Found	Not Found	Not Found	Not Found	Not Found	Not Found	Not Found		1.61168	1
False	Medium	IsMasterProtein	TRINITY_DN1029_c0_g1_i2.p1	type:complete gc:universal TRINITY_DN1029_c0_g1_i2:3254-1134(-)	False	0.0146413	1.64397	1.41643	1	1	1	1	706	78.805	6.32	Not Found	Not Found	Not Found	Not Found	Not Found	Not Found	Not Found	High	Not Found	Not Found	Not Found	Not Found	Not Found	Not Found		2.40624	1
False	Medium	IsMasterProtein	TRINITY_DN1327_c0_g1_i11.p2	type:complete gc:universal TRINITY_DN1327_c0_g1_i11:1893-1486(-)	False	0.0146413	1.64321	5.18519	1	1	1	1	135	15.04	10.1	Not Found	High	Not Found	Not Found	Not Found	Not Found	High	Not Found	Not Found	Not Found	Not Found	Not Found	Not Found	Not Found		1.69184	1
False	Medium	IsMasterProtein	TRINITY_DN1175_c0_g1_i1.p1	type:complete gc:universal TRINITY_DN1175_c0_g1_i1:267-1586(+)	False	0.0160936	1.63564	2.2779	1	1	1	1	439	49.876	7.34	Not Found	Not Found	High	Not Found	Not Found	Not Found	Not Found	Not Found	Not Found	Not Found	Not Found	Not Found	Not Found	Not Found		1.74428	1
False	Medium	IsMasterProtein	TRINITY_DN3265_c0_g1_i11.p1	type:complete gc:universal TRINITY_DN3265_c0_g1_i11:137-688(+)	False	0.0168129	1.62819	3.82514	1	1	1	1	183	20.356	8.72	High	Not Found	Not Found	Not Found	Not Found	High	High	High	High	High	Not Found	Not Found	Not Found	Not Found		1.60229	1
False	Medium	IsMasterProtein	TRINITY_DN3801_c0_g2_i2.p1	type:5prime_partial gc:universal TRINITY_DN3801_c0_g2_i2:1-1767(+)	False	0.0182482	1.61979	1.36054	1	1	1	1	588	65.633	6.06	Not Found	Not Found	High	Not Found	Not Found	Not Found	Not Found	High	Not Found	High	Not Found	Not Found	Not Found	Not Found		0	1
False	Medium	IsMasterProtein	TRINITY_DN80_c2_g2_i5.p1	type:5prime_partial gc:universal TRINITY_DN80_c2_g2_i5:2123-324(-)	False	0.0196507	1.59963	1.00167	1	1	1	1	599	66.5	7.49	Not Found	Not Found	Not Found	Not Found	Not Found	Not Found	High	High	Not Found	Not Found	Not Found	Not Found	Not Found	Not Found		3.44183	1
False	Medium	IsMasterProtein	TRINITY_DN8486_c0_g1_i10.p1	type:complete gc:universal TRINITY_DN8486_c0_g1_i10:75-791(+)	False	0.0196507	1.59791	4.20168	1	1	1	1	238	27.688	9.52	Not Found	Not Found	Not Found	Not Found	Not Found	Not Found	Not Found	Not Found	Not Found	High	Not Found	Not Found	Not Found	Not Found		2.86024	1
False	Medium	IsMasterProtein	TRINITY_DN10780_c0_g1_i1.p1	type:complete gc:universal TRINITY_DN10780_c0_g1_i1:333-1547(+)	False	0.0196507	1.59108	1.9802	1	1	1	1	404	46.072	8.05	Not Found	Not Found	Not Found	High	High	Not Found	Not Found	Not Found	Not Found	Not Found	Not Found	High	Not Found	Not Found		3.59846	1
False	Medium	IsMasterProtein	TRINITY_DN12795_c0_g2_i1.p1	type:3prime_partial gc:universal TRINITY_DN12795_c0_g2_i1:203-667(+)	False	0.0203193	1.58771	4.51613	1	1	1	1	155	17.884	9	Not Found	Not Found	Not Found	Not Found	Not Found	Not Found	Not Found	Not Found	Not Found	Not Found	Not Found	High	Not Found	Not Found		2.1266	1
False	Medium	IsMasterProtein	TRINITY_DN3282_c0_g1_i1.p1	type:complete gc:universal TRINITY_DN3282_c0_g1_i1:2052-1345(-)	False	0.0203193	1.57922	3.40426	1	1	1	1	235	26.098	9.48	Not Found	Not Found	Not Found	Not Found	Not Found	Not Found	Not Found	Not Found	Not Found	Not Found	Not Found	Not Found	Not Found	High		0	1
False	Medium	IsMasterProtein	TRINITY_DN1167_c0_g1_i3.p1	type:3prime_partial gc:universal TRINITY_DN1167_c0_g1_i3:258-2714(+)	False	0.0203193	1.57675	1.0989	1	1	1	1	819	88.666	6.61	Not Found	Not Found	Not Found	Not Found	Not Found	High	Not Found	Not Found	Not Found	Not Found	Not Found	Not Found	Not Found	Not Found		0	1
False	Medium	IsMasterProtein	TRINITY_DN16595_c0_g1_i1.p1	type:complete gc:universal TRINITY_DN16595_c0_g1_i1:703-38(-)	False	0.021645	1.56992	4.52489	1	1	1	1	221	25.109	11.36	Not Found	Not Found	Not Found	Not Found	Not Found	Not Found	Not Found	Not Found	Not Found	High	High	High	Not Found	Not Found		8.23582	1
False	Medium	IsMasterProtein	TRINITY_DN2967_c0_g1_i1.p1	type:complete gc:universal TRINITY_DN2967_c0_g1_i1:646-92(-)	False	0.021645	1.56767	4.34783	1	1	1	1	184	20.622	8.48	High	Not Found	Not Found	Not Found	Not Found	Not Found	Not Found	Not Found	Not Found	Not Found	Not Found	Not Found	Not Found	Not Found		1.70621	1
False	Medium	IsMasterProtein	TRINITY_DN52136_c0_g1_i1.p1	type:internal gc:universal TRINITY_DN52136_c0_g1_i1:2-508(+)	False	0.021645	1.553	7.10059	1	1	1	1	169	18.584	8.84	Not Found	Not Found	Not Found	Not Found	Not Found	High	Not Found	Not Found	Not Found	Not Found	Not Found	Not Found	Not Found	Not Found		0	1
False	Medium	IsMasterProtein	TRINITY_DN4982_c0_g1_i4.p1	type:5prime_partial gc:universal TRINITY_DN4982_c0_g1_i4:3549-1489(-)	False	0.021645	1.54699	1.31195	1	1	1	1	686	78.626	8.09	Not Found	Not Found	Not Found	Not Found	Not Found	Not Found	High	Not Found	Not Found	Not Found	Not Found	Not Found	Not Found	Not Found		1.93044	1
False	Medium	IsMasterProtein	TRINITY_DN235_c0_g1_i3.p1	type:5prime_partial gc:universal TRINITY_DN235_c0_g1_i3:1-924(+)	False	0.0229885	1.5388	3.58306	1	1	1	1	307	35.7	5	Not Found	Not Found	Not Found	Not Found	Not Found	Not Found	Not Found	Not Found	Not Found	Not Found	Not Found	High	Not Found	Not Found		0	1
False	Medium	IsMasterProtein	TRINITY_DN29635_c0_g1_i2.p2	type:5prime_partial gc:universal TRINITY_DN29635_c0_g1_i2:2-388(+)	False	0.0229885	1.53343	5.46875	1	1	1	1	128	14.632	9.83	Not Found	Not Found	Not Found	High	Not Found	Not Found	Not Found	Not Found	Not Found	Not Found	Not Found	Not Found	Not Found	Not Found		2.33389	1
False	Medium	IsMasterProtein	TRINITY_DN3130_c0_g1_i1.p1	type:complete gc:universal TRINITY_DN3130_c0_g1_i1:2556-940(-)	False	0.0229885	1.52462	2.7881	1	1	1	1	538	59.702	5.31	Not Found	Not Found	Not Found	Not Found	Not Found	Not Found	Not Found	Not Found	Not Found	Not Found	High	Not Found	Not Found	Not Found		2.55657	1
False	Medium	IsMasterProtein	TRINITY_DN781_c0_g1_i7.p1	type:complete gc:universal TRINITY_DN781_c0_g1_i7:2421-97(-)	False	0.0229885	1.52346	1.29199	1	1	1	1	774	87.385	6.15	Not Found	Not Found	Not Found	Not Found	Not Found	Not Found	High	Not Found	Not Found	Not Found	Not Found	Not Found	Not Found	Not Found		1.7809	1
False	Medium	IsMasterProtein	TRINITY_DN1115_c0_g1_i14.p1	type:complete gc:universal TRINITY_DN1115_c0_g1_i14:2774-624(-)	False	0.0229885	1.52273	1.25698	1	1	1	1	716	81.295	7.53	Not Found	High	Not Found	Not Found	Not Found	Not Found	Not Found	Not Found	High	Not Found	High	Not Found	Not Found	Not Found		3.22657	1
False	Medium	IsMasterProtein	TRINITY_DN1408_c0_g1_i13.p1	type:complete gc:universal TRINITY_DN1408_c0_g1_i13:8902-3386(-)	False	0.0244078	1.51956	0.54407	1	1	1	1	1838	209.7	6.8	Not Found	Not Found	Not Found	Not Found	Not Found	Not Found	Not Found	Not Found	High	Not Found	Not Found	Not Found	Not Found	Not Found		0	1
False	Medium	IsMasterProtein	TRINITY_DN15115_c0_g1_i3.p2	type:5prime_partial gc:universal TRINITY_DN15115_c0_g1_i3:763-179(-)	False	0.0250896	1.51046	3.60825	1	1	1	1	194	21.893	5.3	Not Found	High	Not Found	Not Found	High	High	High	High	Not Found	Not Found	Not Found	Not Found	Not Found	Not Found		7.57814	1
False	Medium	IsMasterProtein	TRINITY_DN340_c0_g1_i2.p1	type:5prime_partial gc:universal TRINITY_DN340_c0_g1_i2:1644-352(-)	False	0.0250896	1.5099	1.86047	1	1	1	1	430	48.845	6.8	Not Found	Not Found	Not Found	Not Found	Not Found	Not Found	Not Found	Not Found	Not Found	Not Found	High	Not Found	Not Found	Not Found		0	1
False	Medium	IsMasterProtein	TRINITY_DN68460_c0_g1_i1.p2	type:complete gc:universal TRINITY_DN68460_c0_g1_i1:153-464(+)	False	0.025788	1.50114	9.70874	1	1	1	1	103	11.215	8.4	Not Found	Not Found	Not Found	Not Found	Not Found	Not Found	Not Found	Not Found	High	Not Found	Not Found	Not Found	Not Found	Not Found		0	1
False	Medium	IsMasterProtein	Cont_Q32KY0	Apolipoprotein D OS=Bos taurus OX=9913 GN=APOD PE=2 SV=1	True	0.0293276	1.46005	3.1746	1	1	1	1	189	21.388	4.84	Not Found	Not Found	Not Found	Not Found	Not Found	Not Found	Not Found	Not Found	High	High	Not Found	Not Found	Not Found	High		5.17711	1
False	Medium	IsMasterProtein	TRINITY_DN960_c0_g1_i1.p1	type:complete gc:universal TRINITY_DN960_c0_g1_i1:62-859(+)	False	0.0293276	1.4593	4.5283	1	1	1	1	265	28.018	8.5	High	High	Not Found	Not Found	Not Found	Not Found	Not Found	Not Found	Not Found	Not Found	Not Found	Not Found	Not Found	Not Found		0	1
False	Medium	IsMasterProtein	TRINITY_DN3715_c0_g1_i9.p1	type:complete gc:universal TRINITY_DN3715_c0_g1_i9:104-1339(+)	False	0.0306705	1.45506	2.6764	1	1	1	1	411	45.678	9.47	Not Found	Not Found	Not Found	Not Found	Not Found	Not Found	Not Found	Not Found	Not Found	Not Found	Not Found	High	Not Found	Not Found		0	1
False	Medium	IsMasterProtein	TRINITY_DN2556_c0_g1_i19.p1	type:complete gc:universal TRINITY_DN2556_c0_g1_i19:4268-2478(-)	False	0.0306705	1.45087	1.34228	1	1	1	1	596	66.944	9.38	Not Found	Not Found	Not Found	Not Found	Not Found	Not Found	High	High	Not Found	Not Found	Not Found	Not Found	Not Found	Not Found		0	1
False	Medium	IsMasterProtein	TRINITY_DN20710_c0_g1_i2.p2	type:5prime_partial gc:universal TRINITY_DN20710_c0_g1_i2:1652-1101(-)	False	0.0306705	1.44539	9.28962	1	1	1	1	183	20.761	11.43	Not Found	Not Found	High	Not Found	Not Found	Not Found	Not Found	Not Found	Not Found	Not Found	Not Found	Not Found	Not Found	Not Found		2.72393	1
False	Medium	IsMasterProtein	TRINITY_DN185_c7_g1_i1.p1	type:complete gc:universal TRINITY_DN185_c7_g1_i1:1769-222(-)	False	0.0312945	1.43723	2.3301	1	1	1	1	515	58.168	7.65	Not Found	Not Found	Not Found	High	Not Found	Not Found	Not Found	Not Found	Not Found	Not Found	Not Found	Not Found	Not Found	Not Found		2.87203	1
False	Medium	IsMasterProtein	TRINITY_DN2270_c0_g1_i1.p1	type:complete gc:universal TRINITY_DN2270_c0_g1_i1:537-2213(+)	False	0.0312945	1.4351	1.07527	1	1	1	1	558	63.068	8.66	Not Found	Not Found	Not Found	Not Found	Not Found	Not Found	Not Found	Not Found	Not Found	Not Found	Not Found	Not Found	Not Found	High		0	1
False	Medium	IsMasterProtein	TRINITY_DN6011_c0_g1_i2.p1	type:complete gc:universal TRINITY_DN6011_c0_g1_i2:1851-190(-)	False	0.0312945	1.42887	1.80832	1	1	1	1	553	60.818	7.02	High	High	Not Found	Not Found	Not Found	Not Found	Not Found	Not Found	Not Found	Not Found	Not Found	Not Found	Not Found	Not Found		0	1
False	Medium	IsMasterProtein	TRINITY_DN3083_c0_g1_i3.p1	type:complete gc:universal TRINITY_DN3083_c0_g1_i3:226-1116(+)	False	0.0318923	1.42481	3.37838	1	1	1	1	296	32.31	8.95	Not Found	Not Found	Not Found	Not Found	Not Found	High	High	High	Not Found	Not Found	Not Found	Not Found	High	Not Found		8.47095	1
False	Medium	IsMasterProtein	TRINITY_DN262_c0_g1_i14.p1	type:complete gc:universal TRINITY_DN262_c0_g1_i14:1884-1012(-)	False	0.0318923	1.40682	2.75862	1	1	1	1	290	31.835	5.86	Not Found	High	Not Found	Not Found	Not Found	Not Found	Not Found	Not Found	Not Found	Not Found	Not Found	Not Found	Not Found	Not Found		0	1
False	Medium	IsMasterProtein	TRINITY_DN6823_c0_g1_i7.p1	type:complete gc:universal TRINITY_DN6823_c0_g1_i7:147-2882(+)	False	0.0318923	1.40572	0.878156	1	1	1	1	911	101.495	9.11	Not Found	Not Found	Not Found	Not Found	Not Found	Not Found	Not Found	Not Found	Not Found	High	Not Found	Not Found	Not Found	Not Found		0	1
False	Medium	IsMasterProtein	TRINITY_DN8356_c0_g1_i1.p1	type:complete gc:universal TRINITY_DN8356_c0_g1_i1:5044-1109(-)	False	0.0318923	1.40483	0.686499	1	1	1	1	1311	149.788	7.01	Not Found	High	Not Found	Not Found	Not Found	Not Found	Not Found	Not Found	Not Found	Not Found	Not Found	Not Found	Not Found	Not Found		0	1
False	Medium	IsMasterProtein	TRINITY_DN18597_c0_g1_i1.p1	type:complete gc:universal TRINITY_DN18597_c0_g1_i1:3526-2948(-)	False	0.0318923	1.40351	4.16667	1	1	1	1	192	21.333	8.15	Not Found	Not Found	Not Found	Not Found	Not Found	Not Found	Not Found	Not Found	Not Found	Not Found	Not Found	Not Found	Not Found	High		0	1
False	Medium	IsMasterProtein	TRINITY_DN16786_c0_g1_i2.p1	type:complete gc:universal TRINITY_DN16786_c0_g1_i2:1729-701(-)	False	0.0324629	1.3999	1.75439	1	1	1	1	342	37.969	5.27	Not Found	Not Found	Not Found	Not Found	Not Found	Not Found	Not Found	Not Found	Not Found	Not Found	Not Found	Not Found	High	Not Found		0	1
False	Medium	IsMasterProtein	TRINITY_DN53922_c0_g1_i1.p1	type:internal gc:universal TRINITY_DN53922_c0_g1_i1:2-460(+)	False	0.0324629	1.39761	3.92157	1	1	1	1	153	17.441	9.85	Not Found	Not Found	Not Found	Not Found	Not Found	Not Found	Not Found	High	Not Found	Not Found	Not Found	Not Found	Not Found	Not Found		1.86793	1
False	Medium	IsMasterProtein	TRINITY_DN13507_c0_g1_i17.p1	type:complete gc:universal TRINITY_DN13507_c0_g1_i17:325-669(+)	False	0.0324629	1.39513	15.7895	1	1	1	1	114	13.62	8.95	Not Found	Not Found	Not Found	Not Found	Not Found	Not Found	Not Found	Not Found	Not Found	Not Found	Not Found	Not Found	Not Found	High		0	1
False	Medium	IsMasterProtein	TRINITY_DN30308_c0_g1_i2.p1	type:complete gc:universal TRINITY_DN30308_c0_g1_i2:192-869(+)	False	0.0324629	1.3903	4	1	1	1	1	225	24.73	4.84	Not Found	High	Not Found	Not Found	Not Found	Not Found	Not Found	Not Found	Not Found	Not Found	Not Found	Not Found	Not Found	Not Found		0	1
False	Medium	IsMasterProtein	TRINITY_DN11375_c0_g1_i7.p1	type:5prime_partial gc:universal TRINITY_DN11375_c0_g1_i7:3-1625(+)	False	0.0324629	1.38945	1.85185	1	1	1	1	540	61.9	8.07	Not Found	Not Found	Not Found	Not Found	Not Found	Not Found	Not Found	High	Not Found	Not Found	Not Found	High	Not Found	Not Found		3.72999	1
False	Medium	IsMasterProtein	TRINITY_DN479_c3_g1_i3.p1	type:complete gc:universal TRINITY_DN479_c3_g1_i3:274-2949(+)	False	0.0331453	1.38018	0.897868	1	1	1	1	891	97.116	6.33	Not Found	Not Found	Not Found	Not Found	Not Found	Not Found	Not Found	Not Found	Not Found	Not Found	High	High	Not Found	Not Found		1.78926	1
False	Medium	IsMasterProtein	TRINITY_DN24751_c0_g2_i1.p1	type:complete gc:universal TRINITY_DN24751_c0_g2_i1:2059-509(-)	False	0.0336134	1.36704	1.55039	1	1	1	1	516	56.957	5.19	Not Found	Not Found	Not Found	Not Found	Not Found	Not Found	Not Found	Not Found	Not Found	Not Found	Not Found	High	Not Found	Not Found		1.81887	1
False	Medium	IsMasterProtein	TRINITY_DN3279_c0_g2_i23.p1	type:5prime_partial gc:universal TRINITY_DN3279_c0_g2_i23:9427-2354(-)	False	0.0336134	1.35823	0.424268	1	1	1	1	2357	250.288	4.61	Not Found	Not Found	Not Found	Not Found	Not Found	Not Found	Not Found	Not Found	Not Found	Not Found	Not Found	High	Not Found	Not Found		0	1
False	Medium	IsMasterProtein	TRINITY_DN1350_c3_g1_i1.p1	type:5prime_partial gc:universal TRINITY_DN1350_c3_g1_i1:2128-944(-)	False	0.0336134	1.35546	1.77665	1	1	1	1	394	43.866	9.35	Not Found	Not Found	High	High	Not Found	Not Found	High	High	Not Found	Not Found	Not Found	Not Found	Not Found	Not Found		11.1974	1
False	Medium	IsMasterProtein	TRINITY_DN359_c0_g1_i13.p1	type:complete gc:universal TRINITY_DN359_c0_g1_i13:4271-1524(-)	False	0.0336134	1.35507	2.18579	1	1	1	1	915	107.177	9.52	Not Found	Not Found	Not Found	Not Found	Not Found	Not Found	Not Found	Not Found	Not Found	Not Found	Not Found	Not Found	Not Found	High		0	1
False	Medium	IsMasterProtein	TRINITY_DN7615_c0_g1_i1.p3	type:complete gc:universal TRINITY_DN7615_c0_g1_i1:697-371(-)	False	0.0336134	1.35487	12.963	1	1	1	1	108	11.576	7.64	High	Not Found	Not Found	Not Found	Not Found	Not Found	Not Found	Not Found	Not Found	Not Found	Not Found	Not Found	Not Found	Not Found		0	1
False	Medium	IsMasterProtein	TRINITY_DN1776_c3_g1_i1.p1	type:complete gc:universal TRINITY_DN1776_c3_g1_i1:69-1682(+)	False	0.0336134	1.35458	1.67598	1	1	1	1	537	59.573	8.51	Not Found	Not Found	Not Found	Not Found	Not Found	Not Found	Not Found	Not Found	High	Not Found	Not Found	Not Found	Not Found	Not Found		0	1
False	Medium	IsMasterProtein	TRINITY_DN6202_c0_g1_i9.p1	type:complete gc:universal TRINITY_DN6202_c0_g1_i9:5857-3050(-)	False	0.034965	1.34611	3.20856	1	1	1	1	935	107.149	4.84	Not Found	Not Found	Not Found	Not Found	Not Found	Not Found	Not Found	High	Not Found	Not Found	Not Found	Not Found	Not Found	Not Found		0	1
False	Medium	IsMasterProtein	TRINITY_DN202_c0_g1_i10.p1	type:5prime_partial gc:universal TRINITY_DN202_c0_g1_i10:2-4234(+)	False	0.0384078	1.32929	0.851064	1	1	1	1	1410	158.618	6.77	Not Found	Not Found	Not Found	High	Not Found	Not Found	Not Found	Not Found	Not Found	Not Found	Not Found	Not Found	Not Found	Not Found		2.07472	1
False	Medium	IsMasterProtein	TRINITY_DN33453_c0_g1_i1.p1	type:internal gc:universal TRINITY_DN33453_c0_g1_i1:1132-2(-)	False	0.0384078	1.32901	3.97878	1	1	1	1	377	42.485	4.69	Not Found	Not Found	Not Found	Not Found	Not Found	Not Found	Not Found	Not Found	Not Found	Not Found	High	Not Found	Not Found	Not Found		0	1
False	Medium	IsMasterProtein	TRINITY_DN3530_c0_g1_i13.p1	type:complete gc:universal TRINITY_DN3530_c0_g1_i13:3747-2464(-)	False	0.0390516	1.32615	3.27869	1	1	1	1	427	49.146	7.21	Not Found	Not Found	Not Found	Not Found	Not Found	Not Found	Not Found	Not Found	Not Found	High	Not Found	Not Found	Not Found	Not Found		1.88818	1
False	Medium	IsMasterProtein	TRINITY_DN45851_c0_g1_i1.p1	type:internal gc:universal TRINITY_DN45851_c0_g1_i1:1-480(+)	False	0.0390516	1.3213	6.875	1	1	1	1	160	18.628	9.83	Not Found	Not Found	High	Not Found	Not Found	Not Found	Not Found	Not Found	Not Found	Not Found	Not Found	Not Found	Not Found	Not Found		0	1
False	Medium	IsMasterProtein	TRINITY_DN8332_c0_g1_i12.p1	type:complete gc:universal TRINITY_DN8332_c0_g1_i12:4475-387(-)	False	0.0396936	1.31668	0.660793	1	1	1	1	1362	151.251	8.24	Not Found	Not Found	Not Found	Not Found	Not Found	Not Found	High	High	Not Found	Not Found	Not Found	Not Found	Not Found	Not Found		3.25644	1
False	Medium	IsMasterProtein	TRINITY_DN4009_c0_g1_i3.p1	type:3prime_partial gc:universal TRINITY_DN4009_c0_g1_i3:818-3(-)	False	0.0410292	1.31158	3.67647	1	1	1	1	272	31.211	6.1	Not Found	Not Found	Not Found	High	Not Found	Not Found	Not Found	Not Found	Not Found	Not Found	Not Found	Not Found	Not Found	Not Found		1.76071	1
False	Medium	IsMasterProtein	TRINITY_DN835_c0_g1_i1.p1	type:5prime_partial gc:universal TRINITY_DN835_c0_g1_i1:3366-925(-)	False	0.0410292	1.31114	0.98401	1	1	1	1	813	91.128	6.3	Not Found	Not Found	Not Found	Not Found	Not Found	Not Found	Not Found	Not Found	Not Found	Not Found	High	Not Found	Not Found	Not Found		0	1
False	Medium	IsMasterProtein	TRINITY_DN3674_c0_g1_i10.p1	type:complete gc:universal TRINITY_DN3674_c0_g1_i10:2313-76(-)	False	0.0416378	1.31096	0.805369	1	1	1	1	745	83.752	6.64	Not Found	Not Found	High	High	Not Found	Not Found	Not Found	Not Found	Not Found	Not Found	Not Found	Not Found	Not Found	Not Found		0	1
False	Medium	IsMasterProtein	TRINITY_DN5662_c0_g1_i1.p4	type:5prime_partial gc:universal TRINITY_DN5662_c0_g1_i1:1-342(+)	False	0.0416378	1.30627	8.84956	1	1	1	1	113	13.097	5.53	Not Found	Not Found	Not Found	Not Found	Not Found	Not Found	Not Found	Not Found	Not Found	Not Found	Not Found	High	Not Found	Not Found		1.91936	1
False	Medium	IsMasterProtein	TRINITY_DN153_c0_g1_i13.p1	type:complete gc:universal TRINITY_DN153_c0_g1_i13:259-1866(+)	False	0.0416378	1.30513	2.05607	1	1	1	1	535	59.567	5.05	Not Found	Not Found	Not Found	Not Found	Not Found	Not Found	Not Found	Not Found	Not Found	Not Found	Not Found	Not Found	High	Not Found		0	1
False	Medium	IsMasterProtein	TRINITY_DN7902_c0_g1_i1.p1	type:complete gc:universal TRINITY_DN7902_c0_g1_i1:411-2861(+)	False	0.0428177	1.29499	3.18627	1	1	1	1	816	92.499	7.71	Not Found	Not Found	High	Not Found	Not Found	Not Found	Not Found	Not Found	Not Found	Not Found	Not Found	Not Found	Not Found	Not Found		3.11315	1
False	Medium	IsMasterProtein	TRINITY_DN4558_c0_g3_i1.p1	type:3prime_partial gc:universal TRINITY_DN4558_c0_g3_i1:169-1449(+)	False	0.0433884	1.28325	3.0445	1	1	1	1	427	46.348	5.95	Not Found	Not Found	High	Not Found	Not Found	Not Found	Not Found	Not Found	Not Found	Not Found	Not Found	Not Found	Not Found	Not Found		2.02881	1
False	Medium	IsMasterProtein	TRINITY_DN1969_c0_g1_i13.p1	type:complete gc:universal TRINITY_DN1969_c0_g1_i13:2391-49(-)	False	0.0433884	1.2825	1.02564	1	1	1	1	780	87.415	7.64	Not Found	Not Found	Not Found	Not Found	Not Found	Not Found	Not Found	Not Found	Not Found	Not Found	High	High	Not Found	Not Found		1.7235	1
False	Medium	IsMasterProtein	TRINITY_DN1401_c10_g1_i1.p2	type:complete gc:universal TRINITY_DN1401_c10_g1_i1:5098-5730(+)	False	0.0433884	1.27827	3.33333	1	1	1	1	210	22.21	8.66	Not Found	Not Found	Not Found	Not Found	Not Found	Not Found	Not Found	Not Found	Not Found	High	Not Found	Not Found	High	High		5.93587	1
False	Medium	IsMasterProtein	TRINITY_DN18778_c0_g1_i1.p2	type:5prime_partial gc:universal TRINITY_DN18778_c0_g1_i1:688-260(-)	False	0.0433884	1.26114	5.6338	1	1	1	1	142	15.429	9.52	Not Found	Not Found	Not Found	High	Not Found	Not Found	Not Found	Not Found	Not Found	Not Found	Not Found	Not Found	Not Found	Not Found		1.87679	1
False	Medium	IsMasterProtein	TRINITY_DN1439_c0_g1_i11.p1	type:complete gc:universal TRINITY_DN1439_c0_g1_i11:270-1088(+)	False	0.0447043	1.24857	3.30882	1	1	1	1	272	31.212	6.43	Not Found	Not Found	High	Not Found	Not Found	Not Found	Not Found	Not Found	Not Found	Not Found	High	Not Found	Not Found	Not Found		0	1
False	Medium	IsMasterProtein	TRINITY_DN691_c0_g1_i12.p1	type:complete gc:universal TRINITY_DN691_c0_g1_i12:2383-311(-)	False	0.0447043	1.24841	2.89855	1	1	1	1	690	78.342	3.99	Not Found	Not Found	Not Found	Not Found	Not Found	Not Found	Not Found	Not Found	Not Found	Not Found	Not Found	Not Found	Not Found	High		0	1
False	Medium	IsMasterProtein	TRINITY_DN1364_c0_g1_i1.p1	type:complete gc:universal TRINITY_DN1364_c0_g1_i1:230-1801(+)	False	0.0460165	1.2439	2.10325	1	1	1	1	523	59.435	6.92	Not Found	Not Found	Not Found	Not Found	Not Found	Not Found	Not Found	High	Not Found	Not Found	Not Found	Not Found	Not Found	Not Found		1.80617	1
False	Medium	IsMasterProtein	TRINITY_DN2954_c0_g1_i10.p2	type:complete gc:universal TRINITY_DN2954_c0_g1_i10:1079-1432(+)	False	0.0460165	1.23203	11.1111	1	1	1	1	117	13.102	7.8	Not Found	Not Found	Not Found	Not Found	Not Found	Not Found	Not Found	Not Found	Not Found	Not Found	Not Found	High	Not Found	Not Found		2.65715	1
False	Medium	IsMasterProtein	TRINITY_DN3269_c0_g1_i8.p1	type:complete gc:universal TRINITY_DN3269_c0_g1_i8:604-2127(+)	False	0.0464164	1.22746	2.36686	1	1	1	1	507	57.524	8.02	High	High	Not Found	Not Found	Not Found	Not Found	Not Found	Not Found	Not Found	Not Found	Not Found	Not Found	Not Found	Not Found		0	1
False	Medium	IsMasterProtein	TRINITY_DN35494_c0_g1_i1.p2	type:complete gc:universal TRINITY_DN35494_c0_g1_i1:98-865(+)	False	0.0464164	1.2217	2.7451	1	1	1	1	255	29.08	9.17	Not Found	Not Found	Not Found	Not Found	Not Found	High	Not Found	Not Found	Not Found	Not Found	Not Found	Not Found	Not Found	Not Found		0	1
False	Medium	IsMasterProtein	TRINITY_DN4521_c0_g1_i2.p1	type:complete gc:universal TRINITY_DN4521_c0_g1_i2:4569-2869(-)	False	0.0464164	1.2199	2.4735	1	1	1	1	566	62.582	7.34	Not Found	High	Not Found	Not Found	Not Found	Not Found	Not Found	Not Found	Not Found	Not Found	Not Found	Not Found	Not Found	Not Found		1.63036	1
False	Medium	IsMasterProtein	TRINITY_DN4704_c1_g1_i2.p1	type:5prime_partial gc:universal TRINITY_DN4704_c1_g1_i2:1876-179(-)	False	0.0464164	1.21839	3.00885	1	1	1	1	565	62.817	4.91	Not Found	Not Found	Not Found	Not Found	Not Found	Not Found	Not Found	Not Found	Not Found	Not Found	High	Not Found	Not Found	Not Found		0	1
False	Medium	IsMasterProtein	TRINITY_DN5557_c0_g1_i4.p1	type:3prime_partial gc:universal TRINITY_DN5557_c0_g1_i4:2652-1(-)	False	0.0464164	1.21746	1.80995	1	1	1	1	884	97.642	7.93	Not Found	Not Found	Not Found	High	Not Found	Not Found	Not Found	Not Found	Not Found	Not Found	Not Found	Not Found	Not Found	Not Found		0	1
False	Medium	IsMasterProtein	TRINITY_DN6368_c0_g1_i1.p1	type:complete gc:universal TRINITY_DN6368_c0_g1_i1:178-1245(+)	False	0.0464164	1.21035	2.8169	1	1	1	1	355	41.008	7.2	Not Found	Not Found	Not Found	Not Found	Not Found	Not Found	Not Found	Not Found	Not Found	Not Found	High	Not Found	Not Found	Not Found		0	1
False	Medium	IsMasterProtein	TRINITY_DN5897_c0_g1_i11.p2	type:5prime_partial gc:universal TRINITY_DN5897_c0_g1_i11:3744-3226(-)	False	0.0464164	1.20957	10.4651	1	1	1	1	172	18.833	11.52	Not Found	Not Found	Not Found	Not Found	Not Found	Not Found	Not Found	Not Found	Not Found	High	Not Found	Not Found	Not Found	Not Found		2.30771	1
False	Medium	IsMasterProtein	TRINITY_DN2590_c0_g1_i3.p1	type:complete gc:universal TRINITY_DN2590_c0_g1_i3:4456-893(-)	False	0.0464164	1.20038	1.0952	1	1	1	1	1187	134.512	7.15	Not Found	Not Found	Not Found	Not Found	Not Found	Not Found	High	Not Found	Not Found	Not Found	Not Found	Not Found	Not Found	Not Found		1.87793	1
False	Medium	IsMasterProtein	TRINITY_DN13632_c0_g1_i1.p1	type:complete gc:universal TRINITY_DN13632_c0_g1_i1:1277-102(-)	False	0.0464164	1.19997	2.30179	1	1	1	1	391	44.329	5.08	Not Found	Not Found	Not Found	Not Found	High	Not Found	Not Found	Not Found	Not Found	Not Found	Not Found	Not Found	Not Found	Not Found		0	1
False	Medium	IsMasterProtein	TRINITY_DN4199_c0_g1_i3.p1	type:complete gc:universal TRINITY_DN4199_c0_g1_i3:172-1371(+)	False	0.0470348	1.19362	3.00752	1	1	1	1	399	46.214	5.8	Not Found	Not Found	Not Found	Not Found	Not Found	Not Found	Not Found	Not Found	Not Found	Not Found	High	Not Found	Not Found	Not Found		0	1
False	Medium	IsMasterProtein	TRINITY_DN1707_c1_g1_i10.p1	type:complete gc:universal TRINITY_DN1707_c1_g1_i10:3298-1367(-)	False	0.0470348	1.19159	1.24417	1	1	1	1	643	73.01	5.62	Not Found	Not Found	Not Found	High	Not Found	Not Found	Not Found	Not Found	Not Found	Not Found	Not Found	High	Not Found	Not Found		3.64206	1
False	Medium	IsMasterProtein	TRINITY_DN8327_c0_g1_i1.p1	type:complete gc:universal TRINITY_DN8327_c0_g1_i1:1587-310(-)	False	0.0483651	1.18755	1.88235	1	1	1	1	425	48.573	5.73	Not Found	Not Found	Not Found	Not Found	Not Found	Not Found	Not Found	Not Found	Not Found	High	Not Found	Not Found	Not Found	Not Found		0	1
False	Medium	IsMasterProtein	TRINITY_DN9475_c3_g1_i1.p1	type:internal gc:universal TRINITY_DN9475_c3_g1_i1:401-3(-)	False	0.0489463	1.18629	6.01504	1	1	1	1	133	15.476	10.2	Not Found	Not Found	Not Found	Not Found	Not Found	Not Found	Not Found	Not Found	Not Found	Not Found	Not Found	High	Not Found	Not Found		0	1
False	Medium	IsMasterProtein	TRINITY_DN494_c0_g1_i10.p1	type:complete gc:universal TRINITY_DN494_c0_g1_i10:1343-78(-)	False	0.0489463	1.18615	4.27553	1	1	1	1	421	46.788	6.11	Not Found	Not Found	Not Found	Not Found	Not Found	Not Found	Not Found	Not Found	Not Found	Not Found	High	Not Found	Not Found	Not Found		2.69533	1
False	Medium	IsMasterProtein	TRINITY_DN5231_c0_g1_i3.p1	type:complete gc:universal TRINITY_DN5231_c0_g1_i3:6276-1876(-)	False	0.0489463	1.18609	0.545703	1	1	1	1	1466	159.679	5.69	Not Found	High	Not Found	Not Found	Not Found	Not Found	Not Found	Not Found	Not Found	Not Found	Not Found	Not Found	High	Not Found		0	1
False	Low	IsMasterProtein	TRINITY_DN700_c0_g1_i1.p1	type:complete gc:universal TRINITY_DN700_c0_g1_i1:435-1946(+)	False	0.0522743	1.17496	1.39165	1	1	1	1	503	55.035	8.69	Not Found	Not Found	Not Found	Not Found	Not Found	Not Found	Not Found	Not Found	Not Found	Not Found	Not Found	Not Found	High	Not Found		1.60966	1
False	Low	IsMasterProtein	TRINITY_DN2030_c0_g1_i9.p1	type:complete gc:universal TRINITY_DN2030_c0_g1_i9:1973-153(-)	False	0.0569878	1.15945	1.65017	1	1	1	1	606	67.96	5.59	Not Found	Not Found	Not Found	Not Found	Not Found	Not Found	Not Found	Not Found	Not Found	Not Found	High	High	Not Found	Not Found		4.14162	1
